# Supplementary material for: Small Molecule Ligands of the BET-like Bromodomain, SmBRD3, Affect Schistosoma mansoni Survival, Oviposition, and Development
Source: PubMed Central journal article supplement (PMC10726355; doi:10.1021/acs.jmedchem.3c01321), 2023-12-04
Supplement: jm3c01321_si_001.pdf [file jm3c01321_si_001.pdf]

## Supporting Information

### **Small molecule ligands of the BET-like bromodomain, *SmBRD3*, affect *Schistosoma mansoni* survival, oviposition, and development**

*Matthias Schiedel,<sup>1,†</sup> Darius J. B. McArdle,<sup>1,†</sup> Gilda Padalino,<sup>2,†,‡</sup> Anthony K. N. Chan,<sup>1</sup> Josephine Forde-Thomas,<sup>2</sup> Michael McDonough,<sup>1</sup> Helen Whiteland,<sup>2</sup> Manfred Beckmann,<sup>2</sup> Rosa Cookson,<sup>3</sup> Karl F. Hoffmann,<sup>2,\*</sup> Stuart J. Conway<sup>1,4,\*</sup>*

<sup>1</sup>Department of Chemistry, Chemistry Research Laboratory, University of Oxford, Mansfield Road, Oxford OX1 3TA, UK

<sup>2</sup>The Institute of Biological, Environmental and Rural Sciences (IBERS), Aberystwyth University, SY23 3DA, Wales, UK

<sup>3</sup>GlaxoSmithKline R&D, Stevenage, Hertfordshire, SG1 2NY, UK

<sup>4</sup>Department of Chemistry & Biochemistry, University of California Los Angeles, 607 Charles E. Young Drive East, P. O. Box 951569, Los Angeles, California, 90095-1569, USA

\*To whom correspondence should be addressed:

[krh@aber.ac.uk](mailto:krh@aber.ac.uk) and [stuartconway@chem.ucla.edu](mailto:stuartconway@chem.ucla.edu)

## Table of contents

| <b>Content</b>                                   | <b>Pages</b> |
|--------------------------------------------------|--------------|
| Supplementary figures, tables, and schemes       | S3–S52       |
| General biology experimental and biology methods | S53–S64      |
| NMR spectra of novel compounds                   | S65–S94      |
| HPLC traces of biologically tested compounds     | S95–S112     |
| References                                       | S113–S114    |



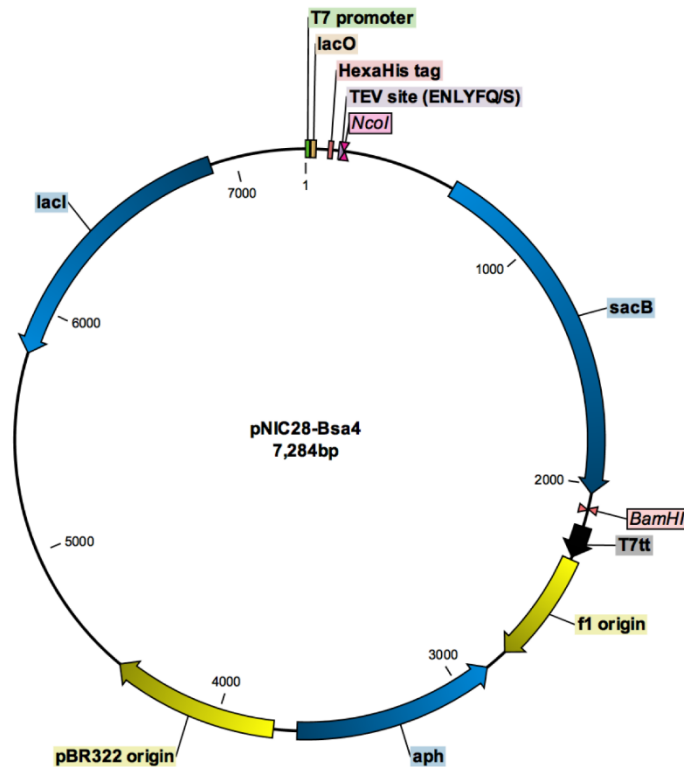

**Figure S-1.** A visual representation of the plasmid cloning and expression vector, pNIC28-Bsa4,<sup>1</sup> which is drawn to scale. All other expression plasmids used in this study share the same vector backbone. The vector contains in-frame hexa-histidine (His<sub>6</sub>) codons, located directly after the initiation start (ATG), for protein purification by immobilized metal affinity chromatography. The T7 promoter is used for transcribing target gene, and T7tt is the T7 transcriptional terminator for terminating gene transcription. The *NcoI* and *BamHI* restriction sites for linearizing the vector for Gibson assembly 2 are shown. The *sacB* gene allows negative selection of plasmid without gene insert on 5% sucrose. Protein expression can be initiated by addition of IPTG (isopropyl β-D-1-thiogalactopyranoside), which removes transcriptional repression exerted by the LacI repressor (encoded by the constitutively expressed *lacI* gene). The locations of the *lacO* (lac operator, the site bound by the LacI repressor) and TEV site (protease cleavage site for removal of the His<sub>6</sub> tag) are indicated. DNA replication origins, pBR322 origin (for double-stranded DNA replication of plasmid in *E. coli*) and f1 (for single stranded replication in presence of a helper phage), are shown. The kanamycin selectable marker gene, *aph*, is labelled, which encodes aminoglycoside 3'-phosphotransferase. The plasmid map was generated and annotated using CLC Main Workbench 7.6.4.

**Table S-1. Primers for the production of H6-SmBRD3(9..378aa) and H6-SmBRD3(241..368aa):**

| Primer       | Direction | Sequence: (5' to 3')                               | T <sub>m</sub> (°C) |
|--------------|-----------|----------------------------------------------------|---------------------|
| GA_f         | Forward   | <u>AGAACCTGTACTTCCAATCC</u>                        | 61                  |
| GA_r         | Reverse   | <u>CGGAGCTCGAATTCG</u>                             | 60                  |
| SmBRD3(2)_f1 | Forward   | AGAACCTGTACTTCCAATCC <u>CCGAAACGTGAATATGAAGAAC</u> | 61                  |
| SmBRD3(2)_r1 | Reverse   | CGGAGCTCGAATTCGGATCCTTATCAGCTTTCATCATCCGGC         | 61                  |

**Cloning of pSmBRD3(9..378aa):**

**Vector:** pNIC28-Bsa4 (7,283 bp) → *NcoI*-HF + *Bam*HI-HF (CutSmart) → linearized vector (5,337 bp)

**Synthetic fragment:** SmBRD3\_9\_to\_378aa (1,156 bp)

**PCR:** SmBRD3\_9\_to\_378aa (1,156 bp)+ GA\_f + GA\_r → p2 (1,156 bp)

**Gibson assembly:** Linearized vector + p2 → **pSmBRD3(9..378aa)** (6,455 bp)

**Sequencing primer(s):** T7F or T7R

**Remark:** The synthetic gene (i.e SmBRD3\_9\_to\_378aa with codons optimized for protein expression in *E. coli*) encodes the SmBRD3(9..378aa) fragment (GenBank ID: CCD76183.1).

>H6-SmBRD3(9..378aa)

MHHHHHSSGVDLGTENLYFQSSEANLDSSNSIKSEPHAAKSHSSKITTNQLEYIKKEVVGRLFKE  
KIVWPFKTPVDHQRLNLPDYPKIHKPMDLGTIKQRLNLFYHSSSECLDDLFTMFRNCYIFNKPGD  
DVVAMAMKLEQIARERLKFMPTEICPQKTPKSIRPIGAPLQVHPPIEPIHTAASTNHTEGLNGS  
AVSVDQTTLPFRPSVTSTSTKKASKKSDSTIDELPSTPQSYDDLSDRRQIKKPKREYEERNVVK  
RLRLSEALKACSNILKDISSQRYRDLNHFFLKPVDVVALGLHDYYDVVKKAMDLSITIKTKLESGQYH  
TKYDFADDVRLMFNNCYKYNGEDSEVARVKGQLQAIFDENFAKVPDDES DPAASPDGRP

**Cloning of pSmBRD3(241..368aa):**

**Vector:** pNIC28-Bsa4 (7,283 bp) *NcoI*-HF + *Bam*HI-HF (CutSmart) → linearized vector (5,337 bp)

**PCR:** pSmBRD3(9..378aa) (6,455 bp) + SmBRD3(2)\_f1 + SmBRD3(2)\_r1 → p24 (430 bp)

**Gibson assembly:** Linearized vector + p24 → **pSmBRD3(241..368aa)** (5,729 bp)

**Sequencing primer(s):** T7F or T7R

**Remark:** Native SmBRD3 (GenBank ID: CCD76183.1).

>H6-SmBRD3(241..368aa)

MHHHHHSSGVDLGTENLYFQSPKREYEERNVVKRLRLSEALKACSNILKDISSQRYRDLNHFFL  
KPVDVVALGLHDYYDVVKKAMDLSITIKTKLESGQYHTKYDFADDVRLMFNNCYKYNGEDSEVARV  
GKQLQAIFDENFAKVPDDES

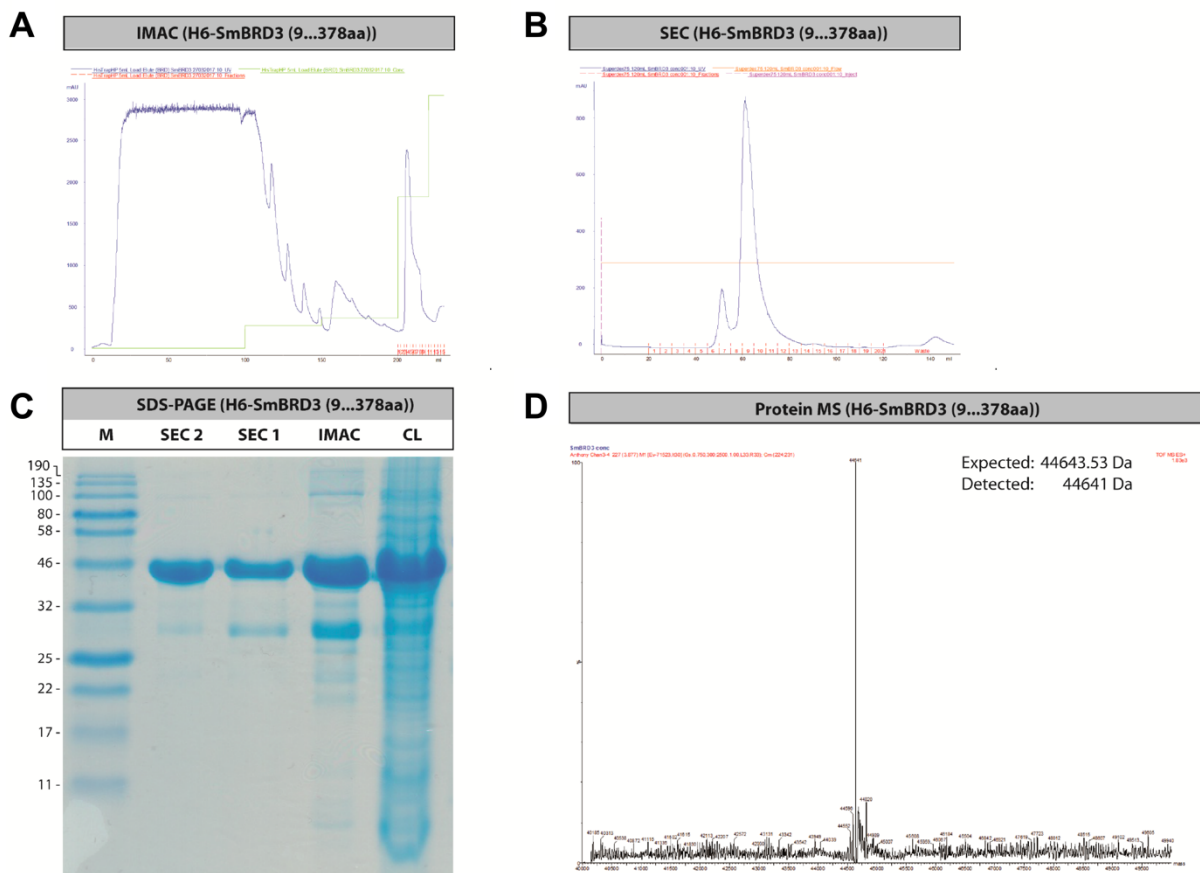

**Figure S-2.** Purification of H6-SmBRD3(1,2) (9..378aa). **A.** IMAC profile; **B.** SEC profile. **C.** SDS-PAGE gel (M = marker, SEC1/2 = different fractions from size exclusion chromatography, IMAC = eluate of immobilized metal ion affinity chromatography, CL = cell lysate); **D.** Protein mass spectrum.

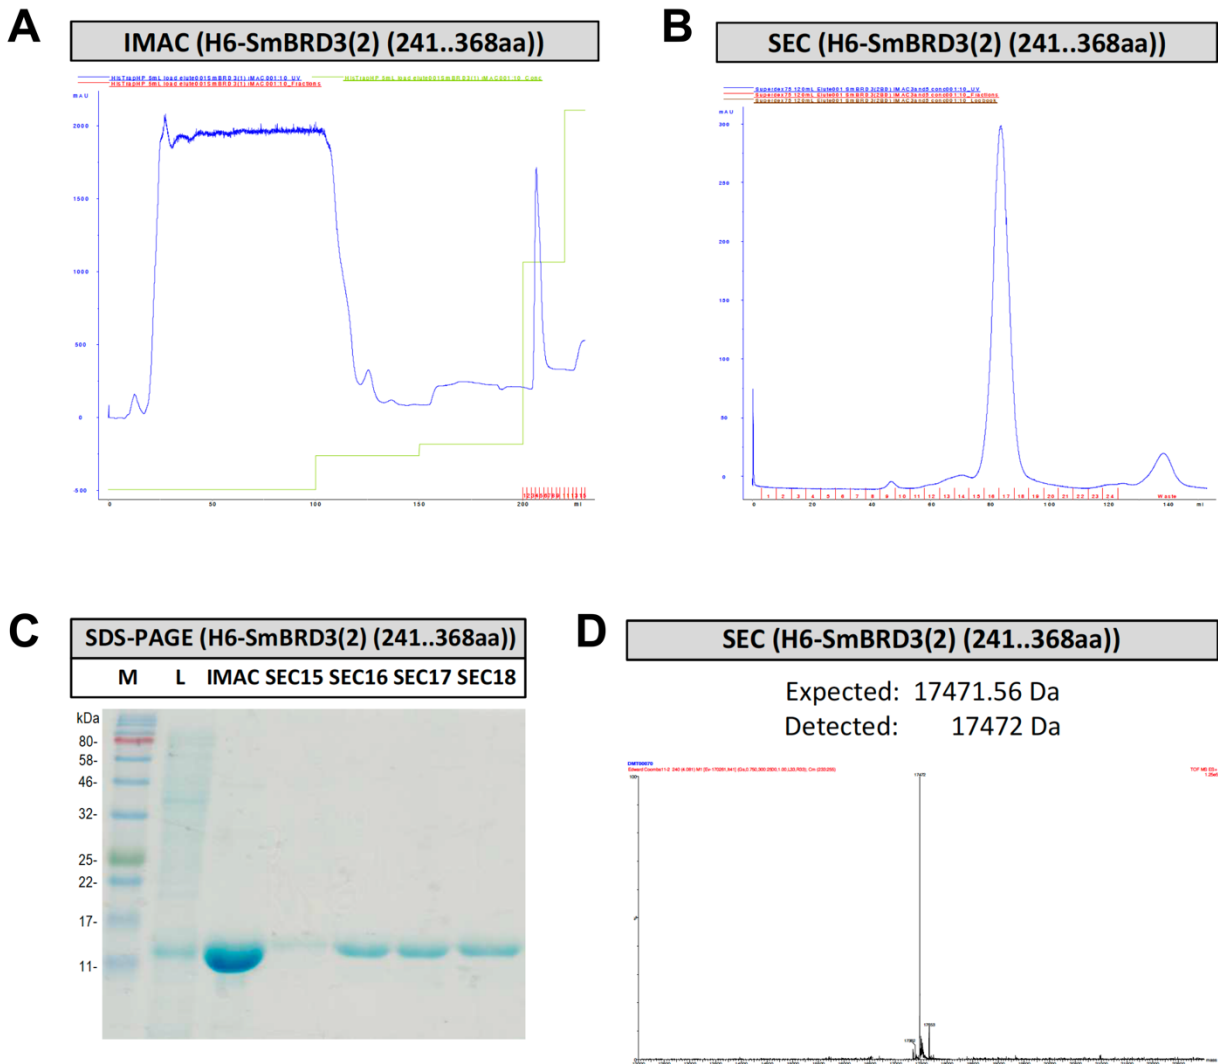

**Figure S-3.** Purification of H6-SmBRD3(2) (241..368aa). **A.** IMAC profile; **B.** SEC profile; **C.** SDS-PAGE gel (M = marker, L = lysate, IMAC = collected eluate from immobilized metal ion affinity chromatography, SEC = collected eluate from size exclusion chromatography); **D.** Protein mass spectrum.

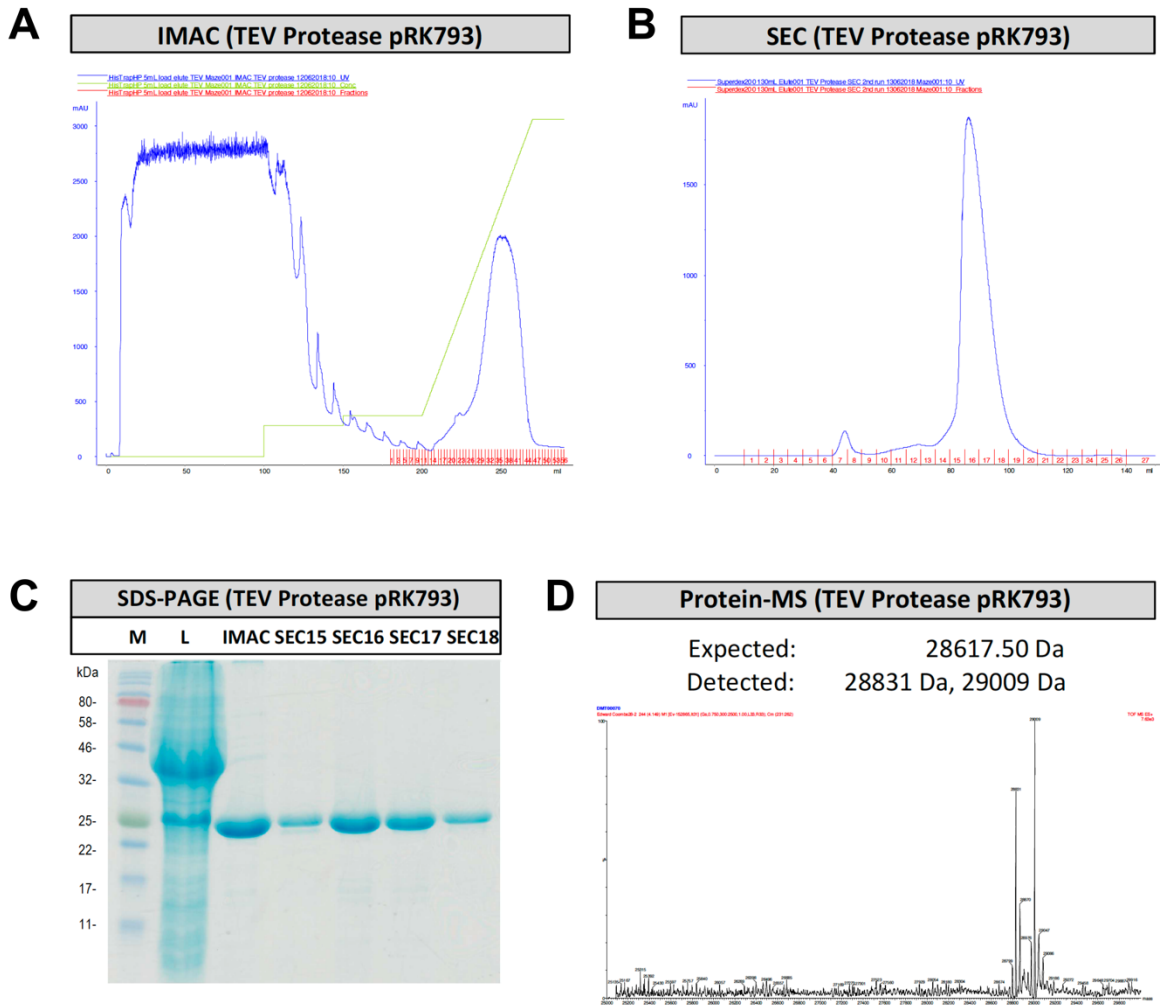

**Figure S-4.** Purification of TEV Protease (pRK793). **A.** IMAC profile; **B.** SEC profile; **C.** SDS-PAGE gel (M = marker, L = lysate, IMAC = collected eluate from immobilized metal ion affinity chromatography, SEC = collected eluate from size exclusion chromatography); **D.** Protein mass spectrometry.

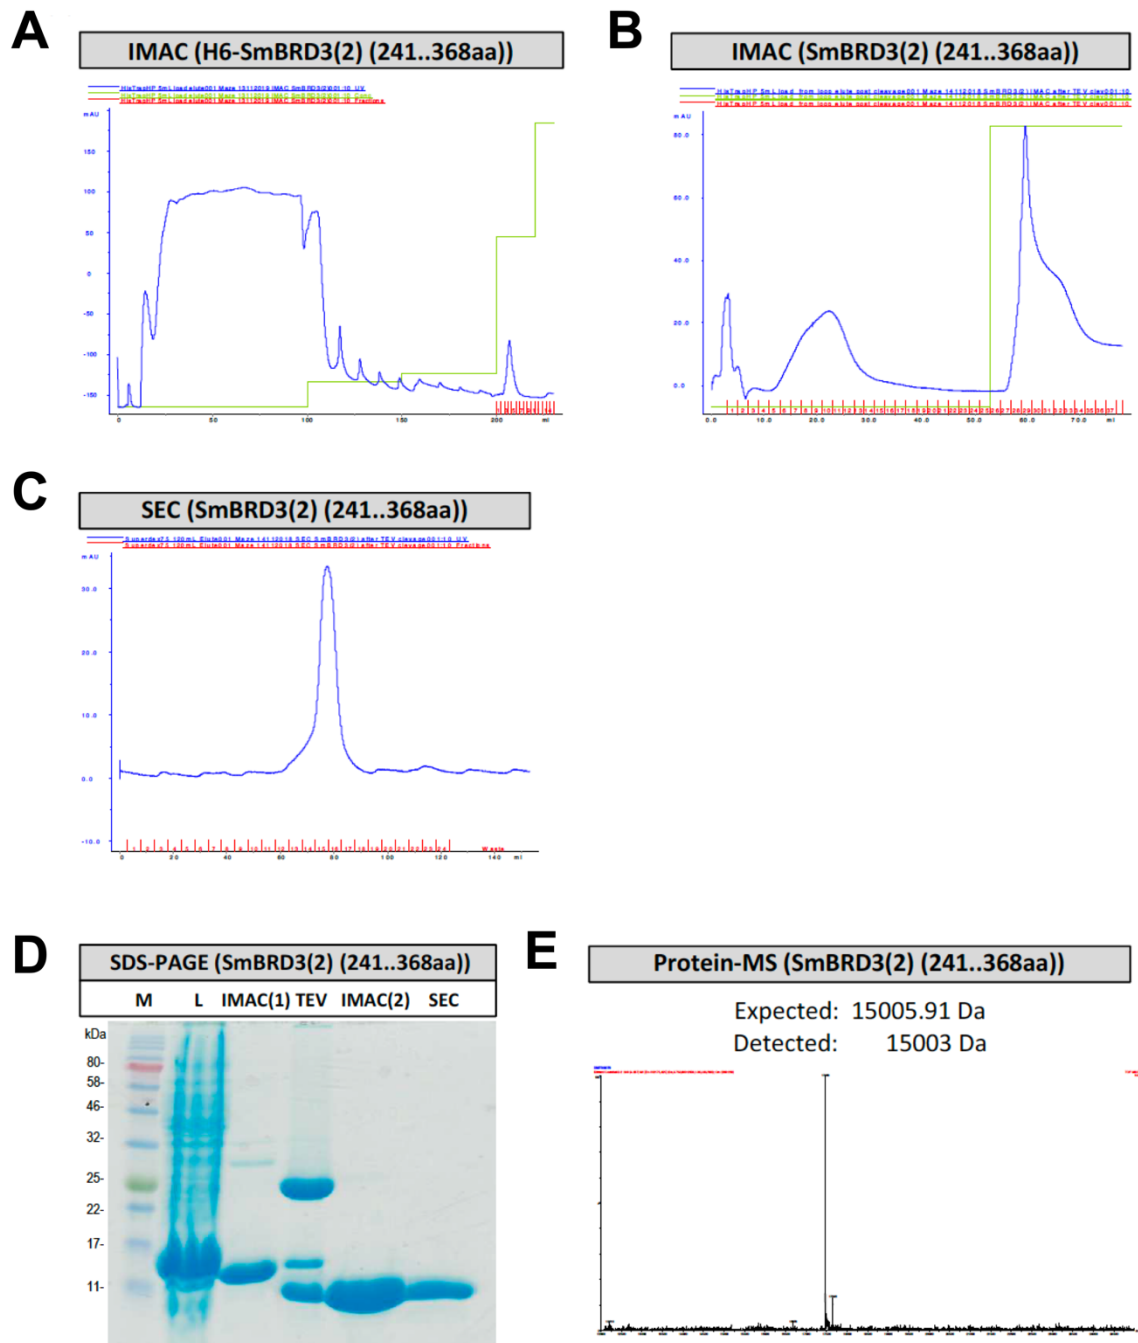

**Figure S-5.** Purification of *SmBRD3(2)* (241..368aa). **A.** IMAC profile before TEV cleavage; **B.** IMAC profile after TEV cleavage; **C.** SEC profile; **D.** SDS-PAGE gel (M = marker, L = lysate, IMAC(1) = collected eluate from immobilized metal ion affinity chromatography prior to TEV cleavage, TEV = incubation with TEV protease (pRK793, Mr = 28617.5 Da), substrate/TEV ratio = 2:1, 4 °C, 16 h), IMAC(2) = collected eluate of immobilized metal ion affinity chromatography after TEV cleavage, SEC = collected eluate of size exclusion chromatography); **E.** Protein mass spectrum.

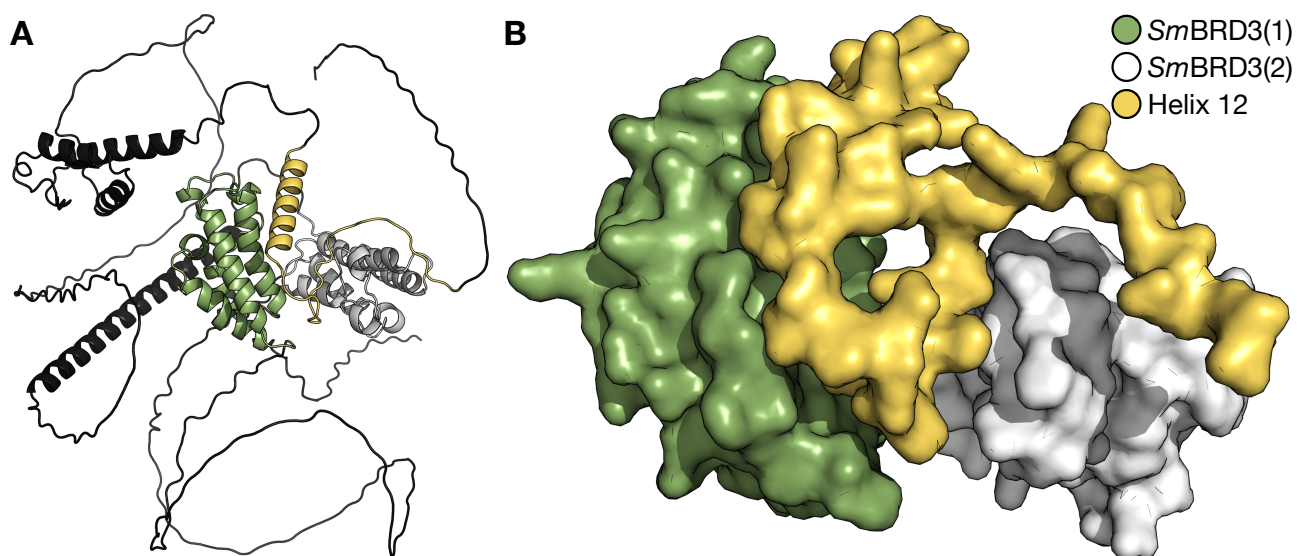

**Figure S-6.A.** The structure of the full length *SmBRD3* protein (Uniprot ID: A0A5K4EQL3) predicted by AlphaFold.<sup>2</sup> Helix 12 (gold) is located between *SmBRD3*(1) (green) and *SmBRD3*(2). **B.** It is proposed that the absence of the hydrophobic intraprotein interactions between *SmBRD3*(1) (green) and helix 12 (gold) are responsible for difficulties in identifying a stable construct for the individual *SmBRD3*(1) bromodomain. We suggest that these hydrophobic interactions are compensated for in the *SmBRD3*(1,2) construct. As *SmBRD3*(2) (white) forms fewer hydrophobic interactions with helix 12 (gold) this bromodomain can be produced as a stable construct.

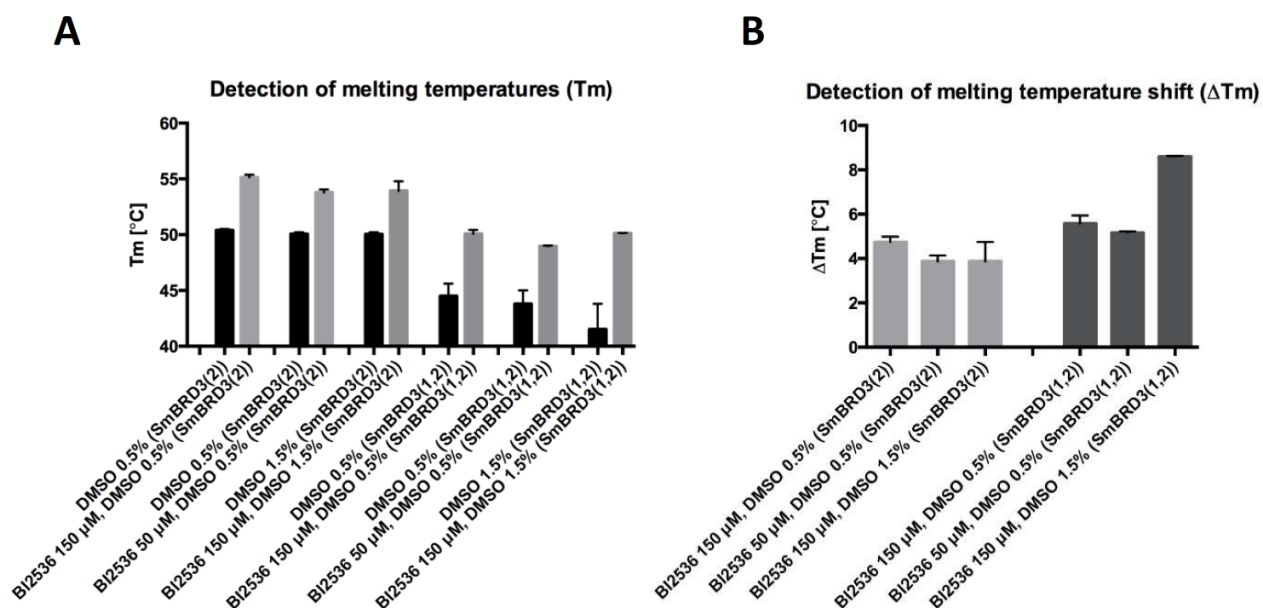

**Figure S-7.** The detection of binding of BI2536 (**7**) to *SmBRD3*(2) and *SmBRD3*(1,2) using a differential scanning fluorimetry (DSF) assay at concentrations of 50  $\mu$ M or 150  $\mu$ M, and DMSO at percentages of 0.5% or 1.5%. **A.** Detection of melting temperatures ( $T_m$ ) of *SmBRD3*(2) and *SmBRD3*(1,2) in the presence of BI2536 (**7**) (50  $\mu$ M or 150  $\mu$ M, 0.5% or 1.5% DMSO) or DMSO (0.5% or 1.5%) ( $n=3$ ). **B.** Thermal shifts of the melting temperatures ( $\Delta T_m$ ) of *SmBRD3*(2) and *SmBRD3*(1,2) in the presence of BI2536 (**7**) (50  $\mu$ M or 150  $\mu$ M, 0.5% or 1.5% DMSO) compared to DMSO (0.5% or 1.5%) ( $n=3$ ).



## Differential Scanning Fluorimetry (Thermal Shift) Screening Against *SmBRD3(2)*

### Thermal Shift Values ( $\Delta T_m$ ) PPI-Net Library Plate 1

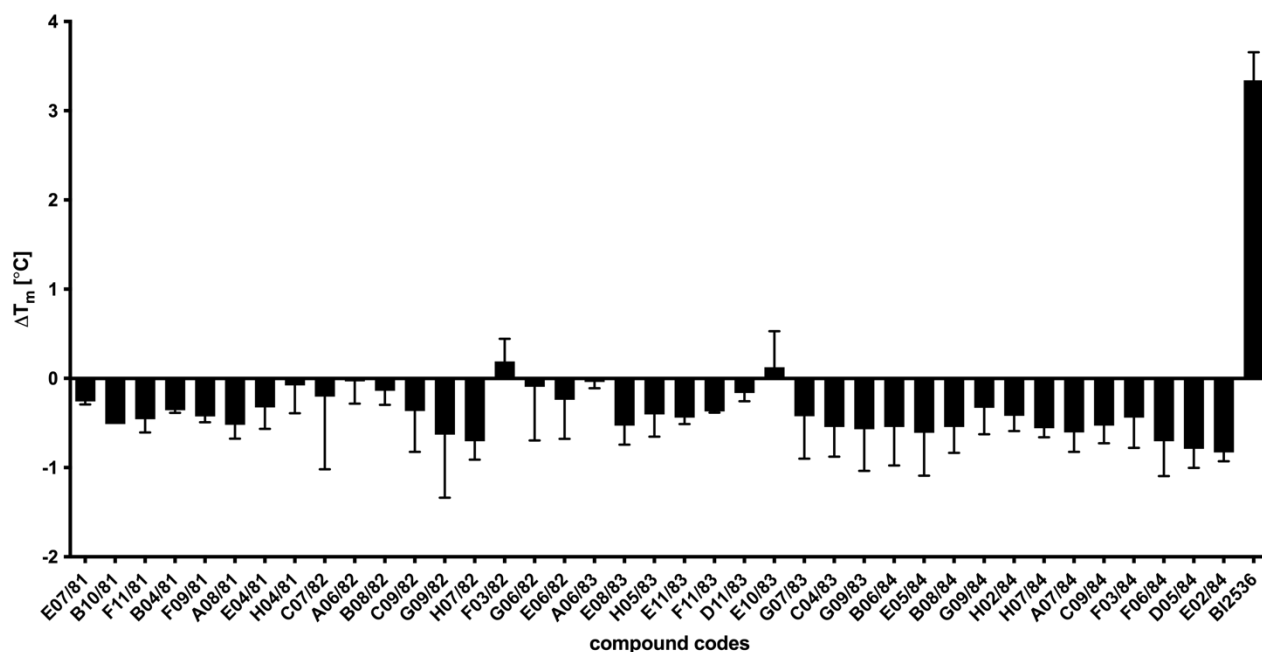

**Figure S-8.** Plate 1. Binding of compounds (50  $\mu\text{M}$ ) of the PPI-Net library to *SmBRD3(2)* monitored using a differential scanning fluorimetry (DSF) assay ( $n=2$ ). BI2536 (7, 50  $\mu\text{M}$ ) was used as a positive control. Mean values  $\pm$  standard deviation are shown.

### Thermal Shift Values ( $\Delta T_m$ ) PPI-Net Plate 2

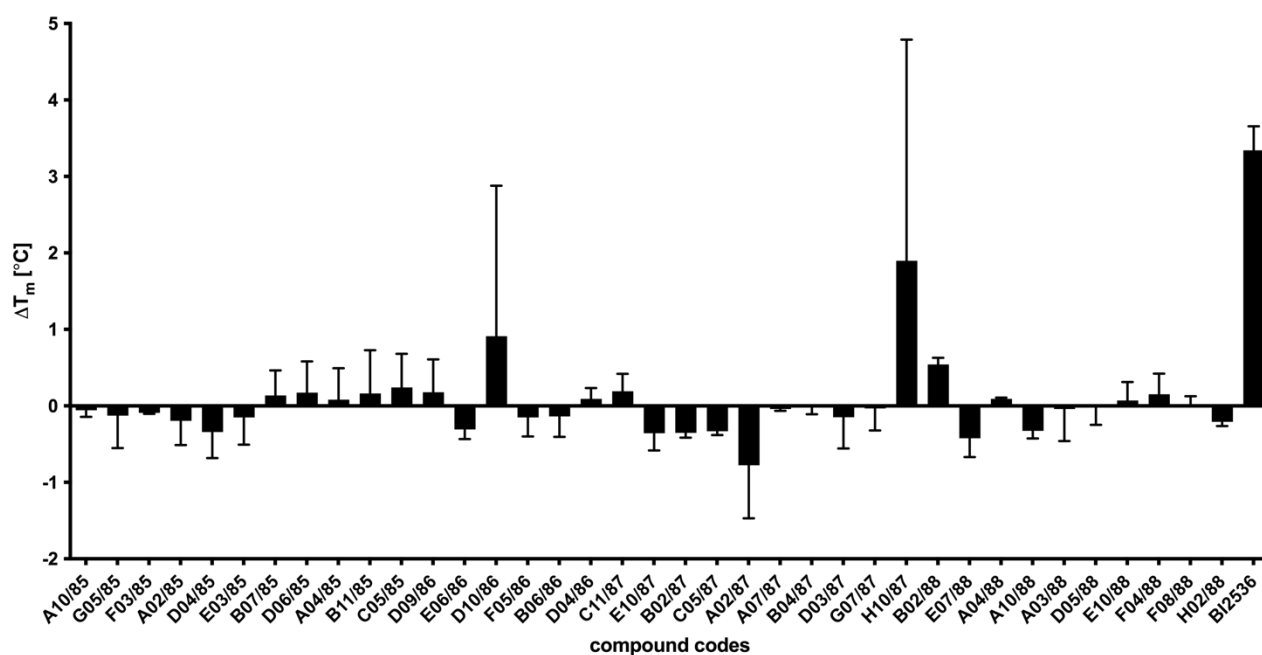

**Figure S-9.** Plate 2. Binding of compounds (50  $\mu\text{M}$ ) of the PPI-Net library to *SmBRD3(2)* monitored using a differential scanning fluorimetry (DSF) assay ( $n=2$ ). BI2536 (7, 50  $\mu\text{M}$ ) was used as a positive control. Mean values  $\pm$  standard deviation are shown.

### Thermal Shift Values ( $\Delta T_m$ ) PPI-Net Plate 3

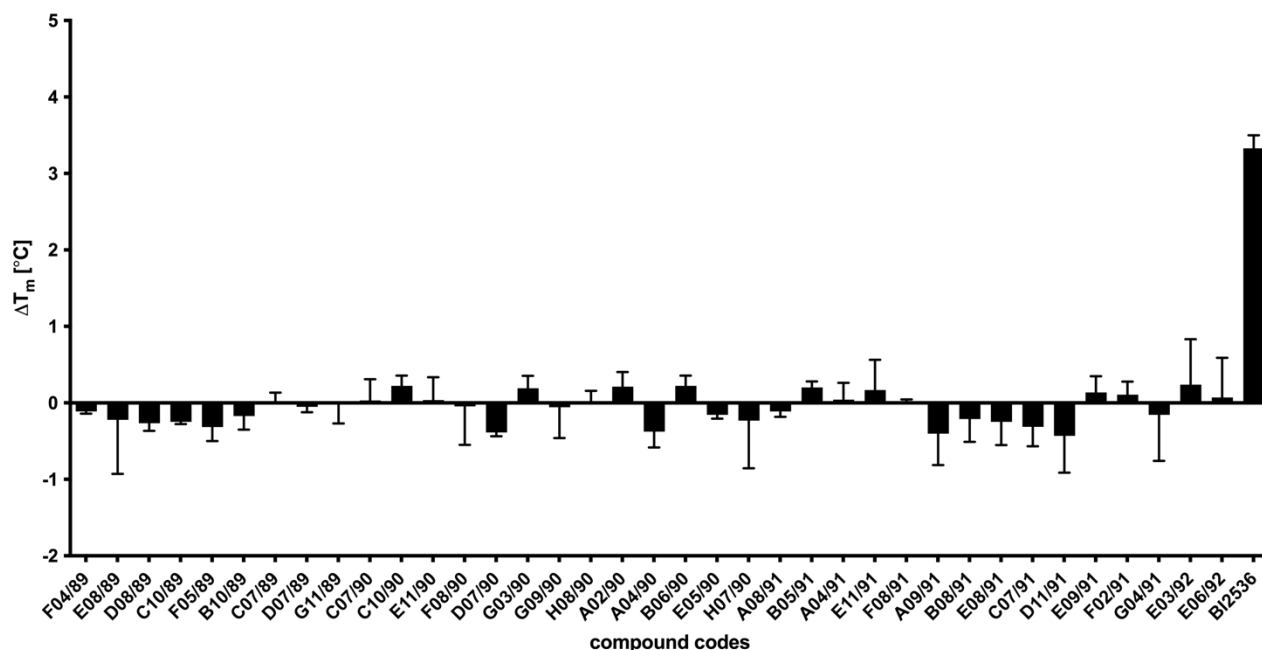

**Figure S-10.** Plate 3. Binding of compounds (50  $\mu$ M) of the PPI-net library to *SmBRD3(2)* monitored using a differential scanning fluorimetry (DSF) assay (n=2). BI2536 (7, 50  $\mu$ M) was used as a positive control. Mean values  $\pm$  standard deviation are shown.

### Thermal Shift Values ( $\Delta T_m$ ) PPI-Net Plate 4

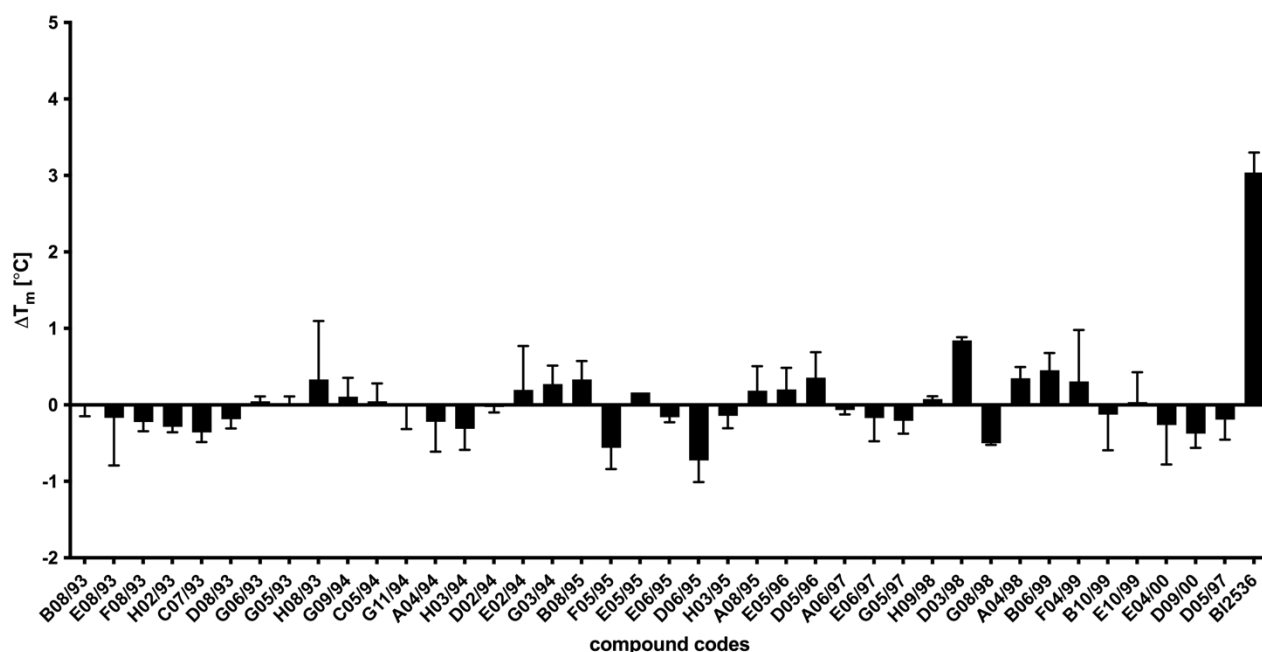

**Figure S-11.** Plate 4. Binding of compounds (50  $\mu$ M) of the PPI-net library to *SmBRD3(2)* monitored using a differential scanning fluorimetry (DSF) assay (n=2). BI2536 (7, 50  $\mu$ M) was used as a positive control. Mean values  $\pm$  standard deviation are shown.

### Thermal Shift Values ( $\Delta T_m$ ) In-house BRD Ligand Library

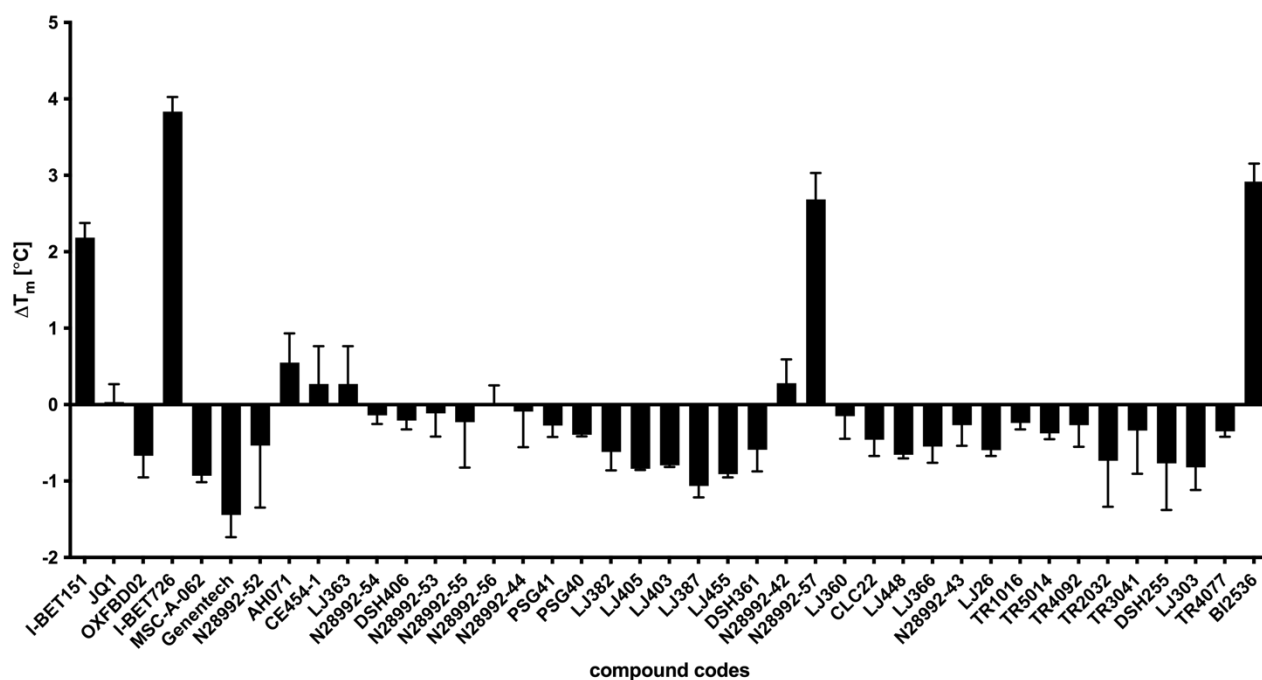

**Figure S-12.** Plate 5. Binding of compounds (50  $\mu$ M) of our in-house library to *SmBRD3(2)* monitored by means of a differential scanning fluorimetry (DSF) setup (n = 2). BI2536 (7, 50  $\mu$ M) was used as a positive control. Mean values  $\pm$  standard deviation are shown.

### Thermal Shift Values ( $\Delta T_m$ ) In-house BRD Ligand Library

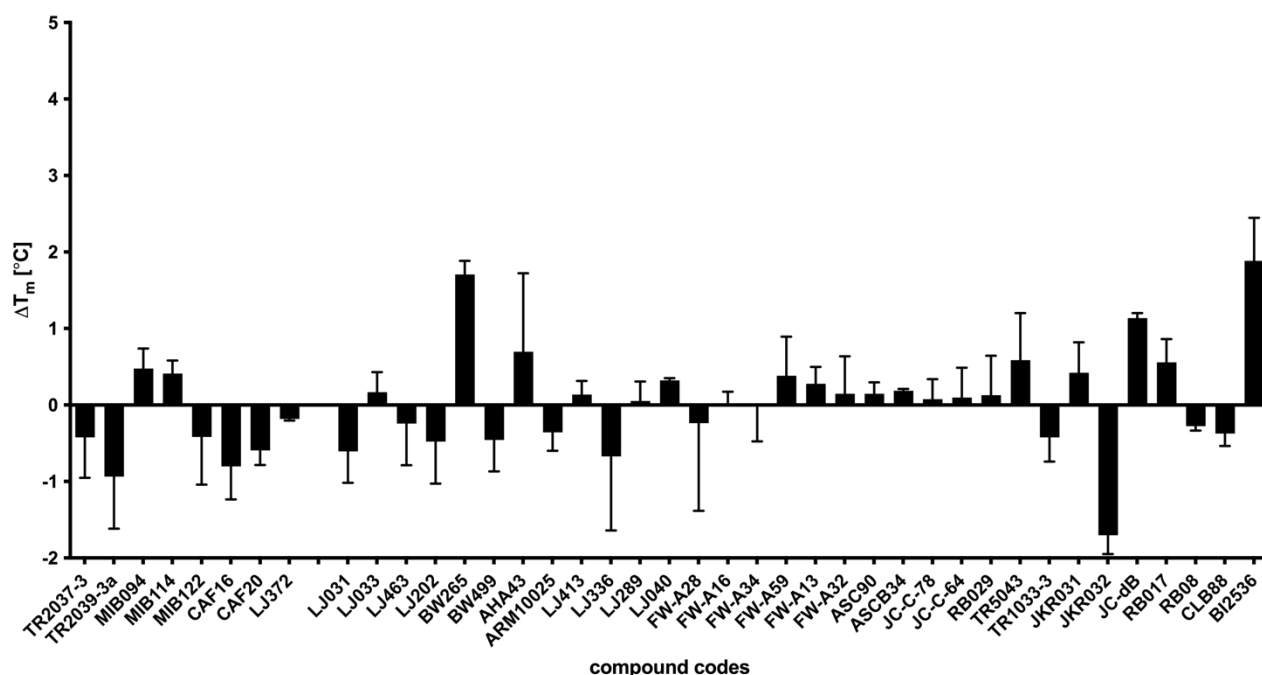

**Figure S-13.** Plate 6. Binding of compounds (50  $\mu$ M) of our in-house library to *SmBRD3(2)* monitored by means of a differential scanning fluorimetry (DSF) setup (n = 2). BI2536 (7, 50  $\mu$ M) was used as a positive control. Mean values  $\pm$  standard deviation are shown.

### Thermal Shift Values ( $\Delta T_m$ ) In-house BRD Ligand Library

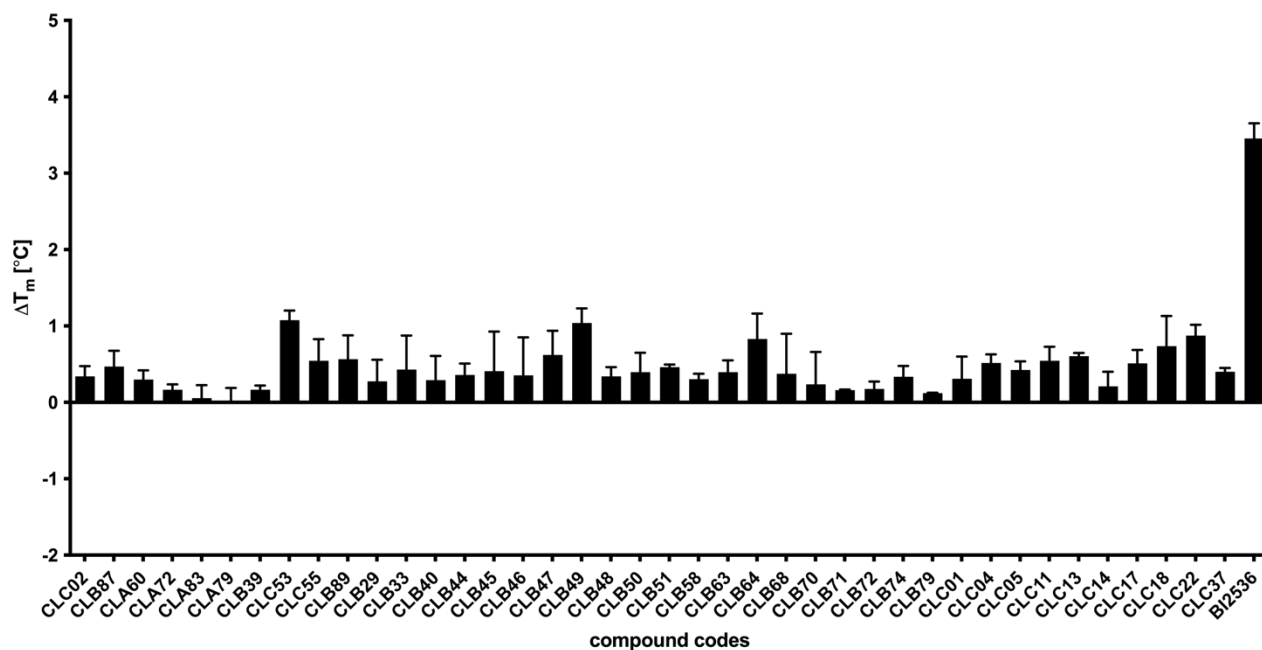

**Figure S-14.** Plate 7. Binding of compounds (50  $\mu$ M) of our in-house library to *SmBRD3(2)* monitored by means of a differential scanning fluorimetry (DSF) setup (n = 2). BI2536 (7, 50  $\mu$ M) was used as a positive control. Mean values  $\pm$  standard deviation are shown.

### Thermal Shift Values ( $\Delta T_m$ ) Maybridge Fragment Library Plate 8

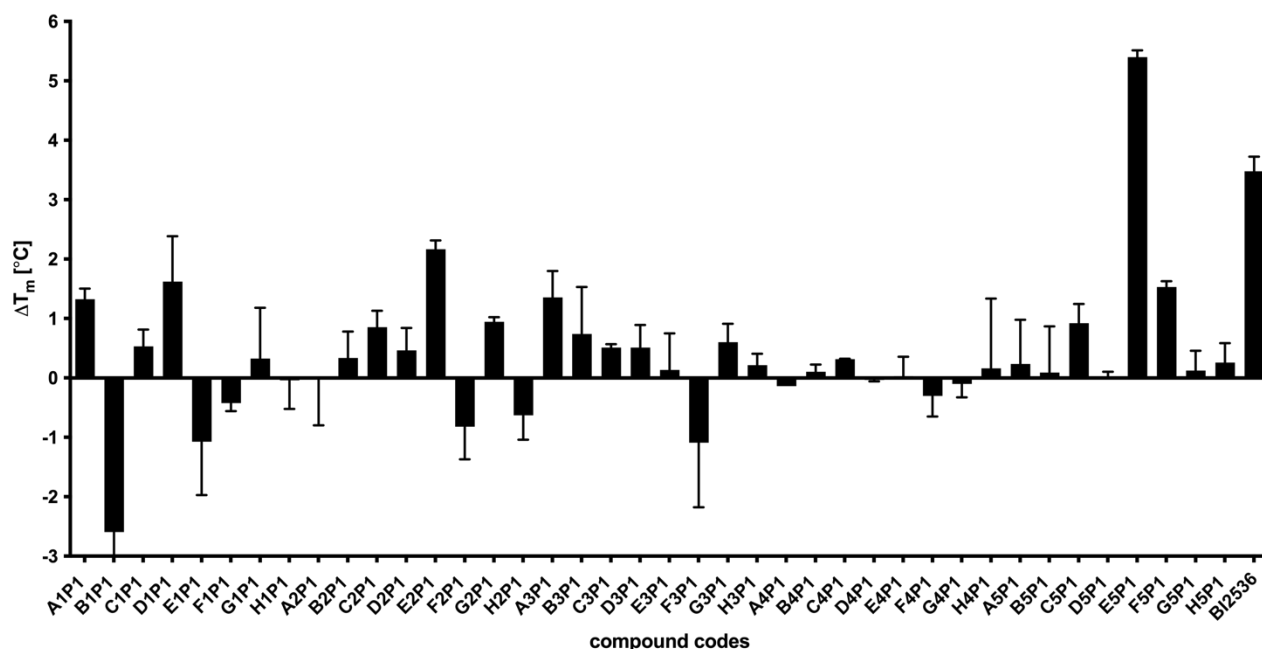

**Figure S-15.** Plate 8. Binding of compounds (150  $\mu$ M) from the Maybridge Fragment Library to *SmBRD3(2)* monitored by means of a differential scanning fluorimetry (DSF) setup (n = 2). BI2536 (7, 150  $\mu$ M) was used as a positive control. Mean values  $\pm$  standard deviation are shown.

### Thermal Shift Values ( $\Delta T_m$ ) Maybridge Fragment Library Plate 9

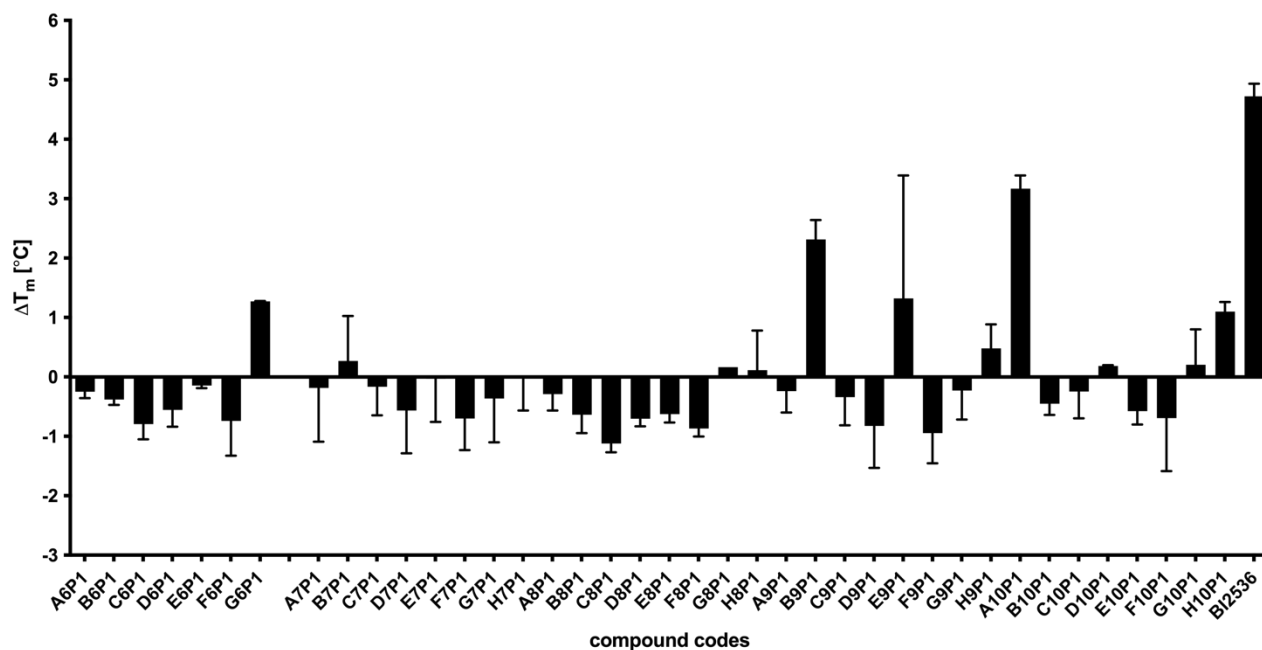

**Figure S-16.** Plate 9. Binding of compounds (150  $\mu$ M) from the Maybridge Fragment Library to *SmBRD3(2)* monitored by means of a differential scanning fluorimetry (DSF) setup ( $n = 2$ ). BI2536 (7, 150  $\mu$ M) was used as a positive control. Mean values  $\pm$  standard deviation are shown.

### Thermal Shift Values ( $\Delta T_m$ ) Maybridge Fragment Library Plate 10

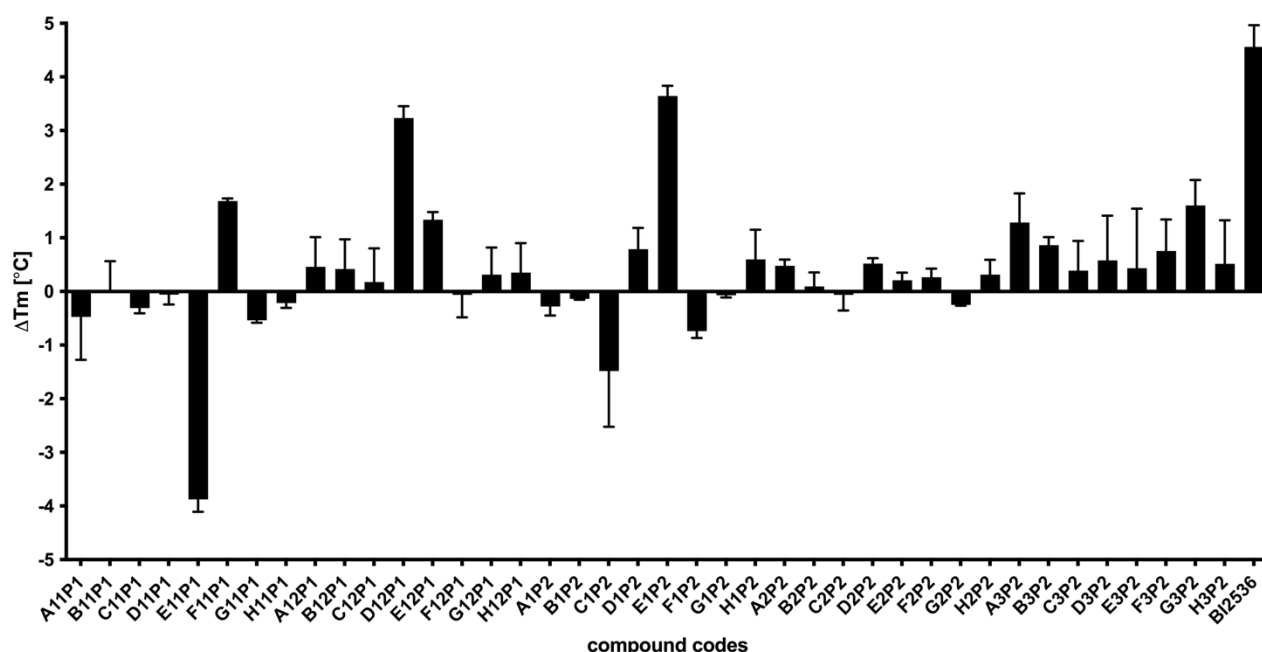

**Figure S-17.** Plate 10. Binding of compounds (150  $\mu$ M) from the Maybridge Fragment Library to *SmBRD3(2)* monitored by means of a differential scanning fluorimetry (DSF) setup ( $n = 2$ ). BI2536 (7, 150  $\mu$ M) was used as a positive control. Mean values  $\pm$  standard deviation are shown.

### Thermal Shift Values ( $\Delta T_m$ ) Maybridge Fragment Library Plate 11

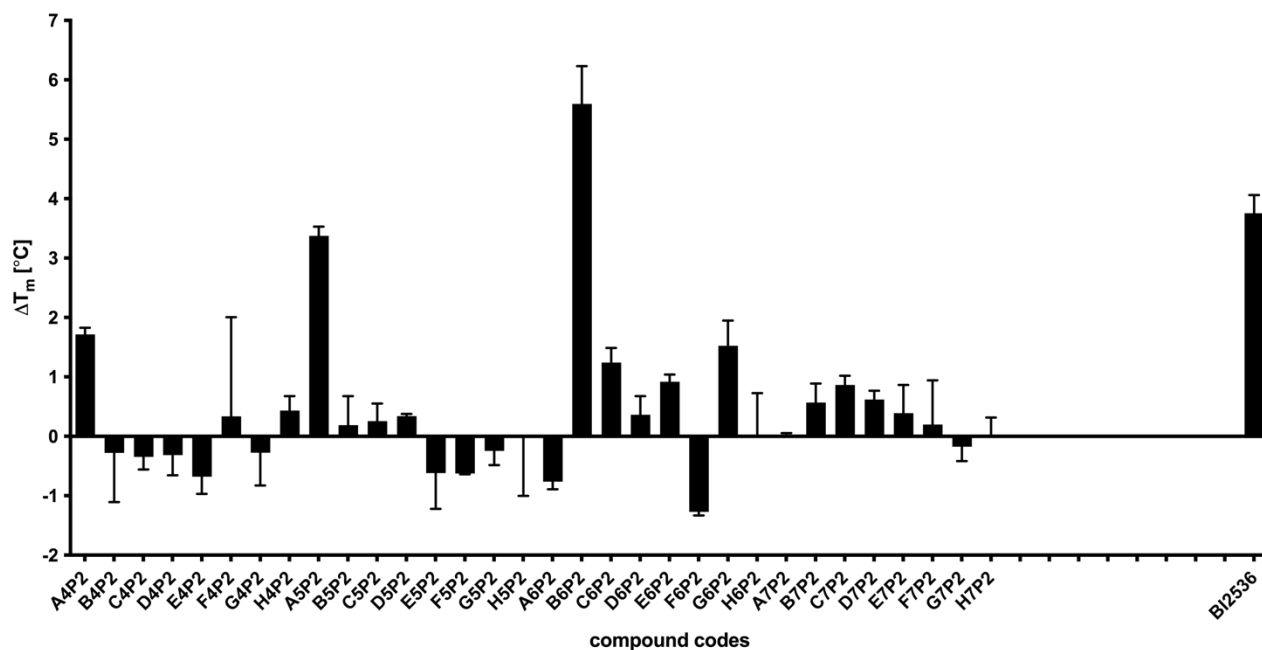

**Figure S-18.** Plate 11. Binding of compounds (150  $\mu$ M) from the Maybridge Fragment Library to *SmBRD3(2)* monitored by means of a differential scanning fluorimetry (DSF) setup ( $n = 2$ ). BI2536 (7, 150  $\mu$ M) was used as a positive control. Mean values  $\pm$  standard deviation are shown.

### Thermal Shift Values ( $\Delta T_m$ ) In-house BRD Ligand Library Plate 12

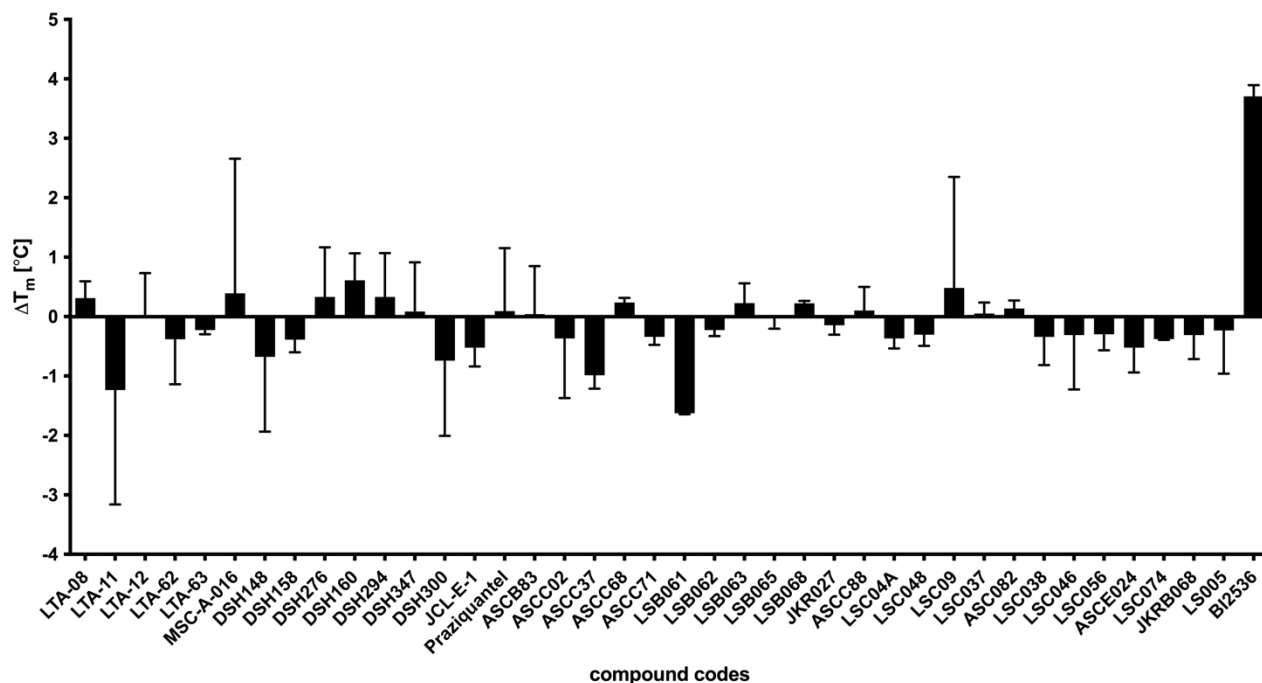

**Figure S-19.** Plate 12. Binding of compounds (50  $\mu$ M) of our in-house library to *SmBRD3(2)* monitored by means of a differential scanning fluorimetry (DSF) setup ( $n = 2$ ). BI2536 (7, 50  $\mu$ M) was used as a positive control. Mean values  $\pm$  standard deviation are shown.

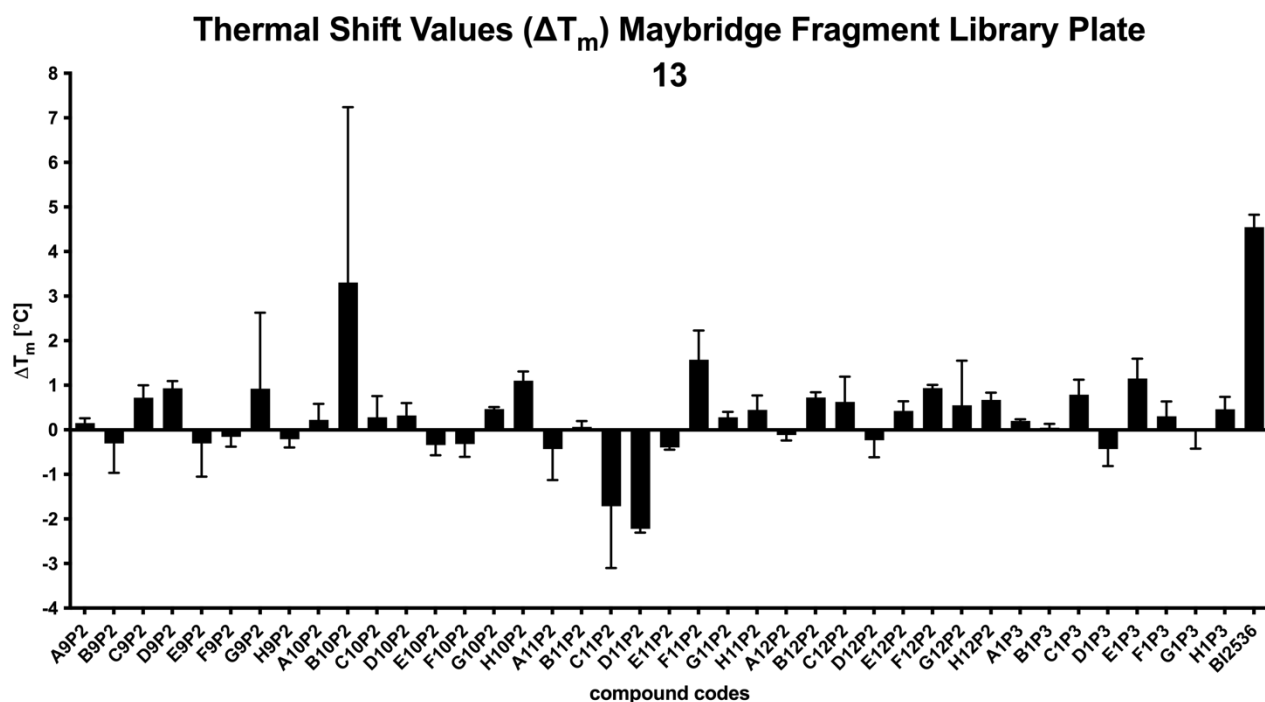

**Figure S-20.** Plate 13. Binding of compounds (150  $\mu$ M) from the Maybridge Fragment Library to *SmBRD3(2)* monitored by means of a differential scanning fluorimetry (DSF) setup (n = 2). BI2536 (7, 150  $\mu$ M) was used as a positive control. Mean values  $\pm$  standard deviation are shown.

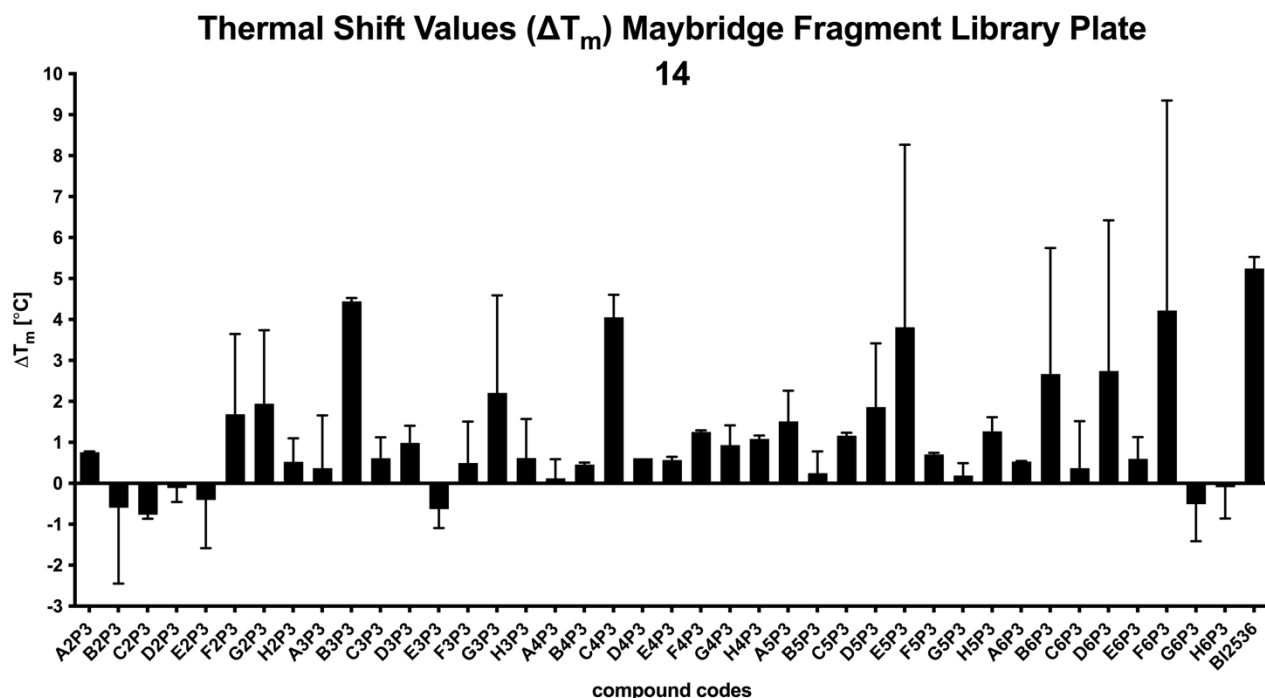

**Figure S-21.** Plate 14. Binding of compounds (150  $\mu$ M) from the Maybridge Fragment Library to *SmBRD3(2)* monitored by means of a differential scanning fluorimetry (DSF) setup (n = 2). BI2536 (7, 150  $\mu$ M) was used as a positive control. Mean values  $\pm$  standard deviation are shown.

### Thermal Shift Values ( $\Delta T_m$ ) Maybridge Fragment Library Plate

15

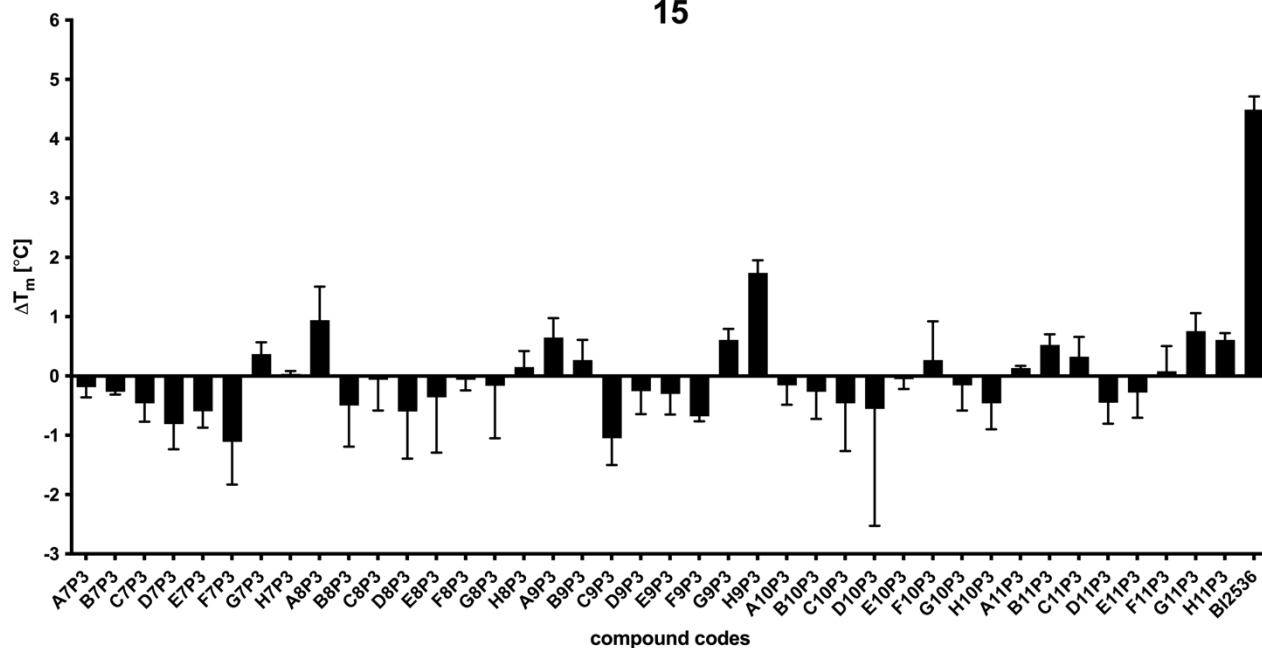

**Figure S-22.** Plate 15. Binding of compounds (150  $\mu$ M) from the Maybridge Fragment Library to *SmBRD3(2)* monitored by means of a differential scanning fluorimetry (DSF) setup (n = 2). BI2536 (7, 150  $\mu$ M) was used as a positive control. Mean values  $\pm$  standard deviation are shown.

### Thermal Shift Values ( $\Delta T_m$ ) Maybridge Fragment Library Plate

16

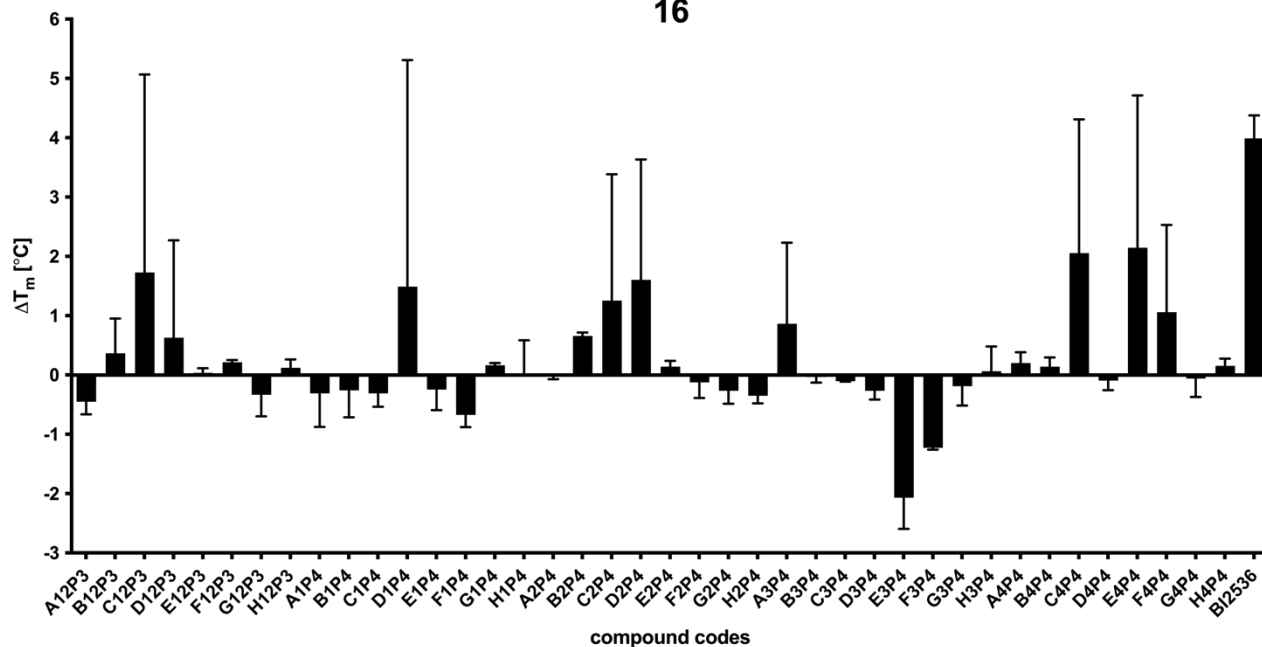

**Figure S-23.** Plate 16. Binding of compounds (150  $\mu$ M) from the Maybridge Fragment Library to *SmBRD3(2)* monitored by means of a differential scanning fluorimetry (DSF) setup (n = 2). BI2536 (7, 150  $\mu$ M) was used as a positive control. Mean values  $\pm$  standard deviation are shown.



### Thermal Shift Values ( $\Delta T_m$ ) Maybridge Fragment Library Plate

17

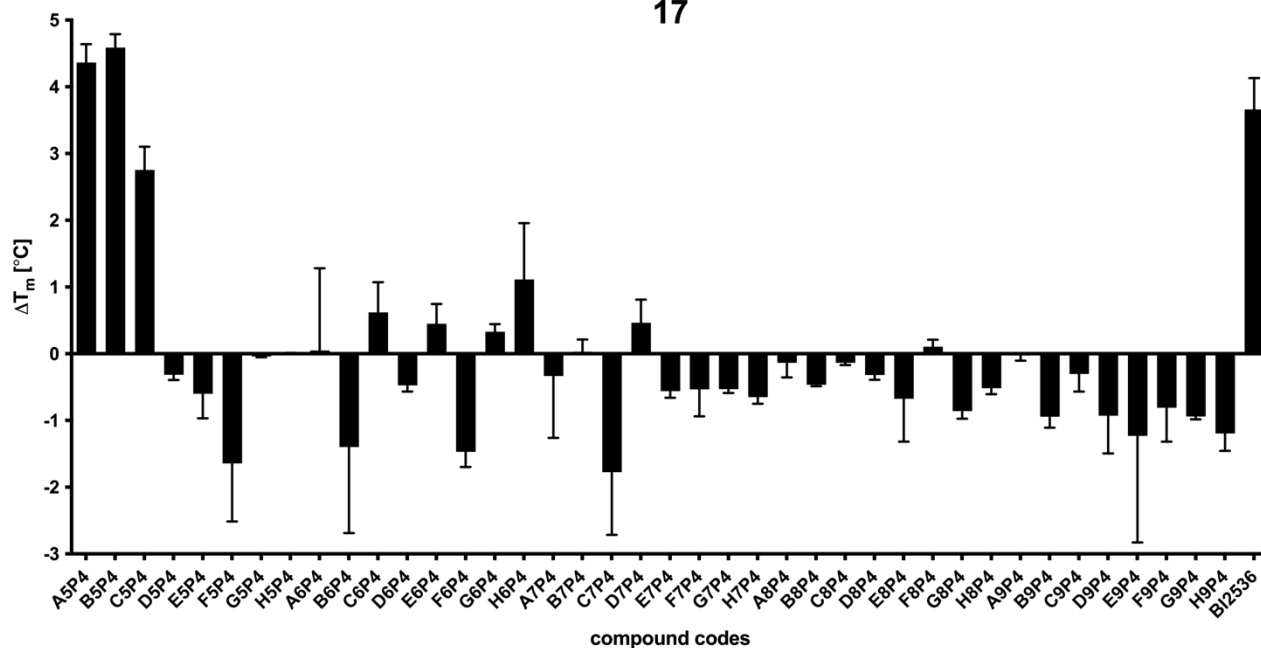

**Figure S-24.** Plate 17. Binding of compounds (150  $\mu$ M) from the Maybridge Fragment Library to *Sm*BRD3(2) monitored by means of a differential scanning fluorimetry (DSF) setup (n = 2). BI2536 (7, 150  $\mu$ M) was used as a positive control. Mean values  $\pm$  standard deviation are shown.

### Thermal Shift Values ( $\Delta T_m$ ) Maybridge Fragment Library Plate

18

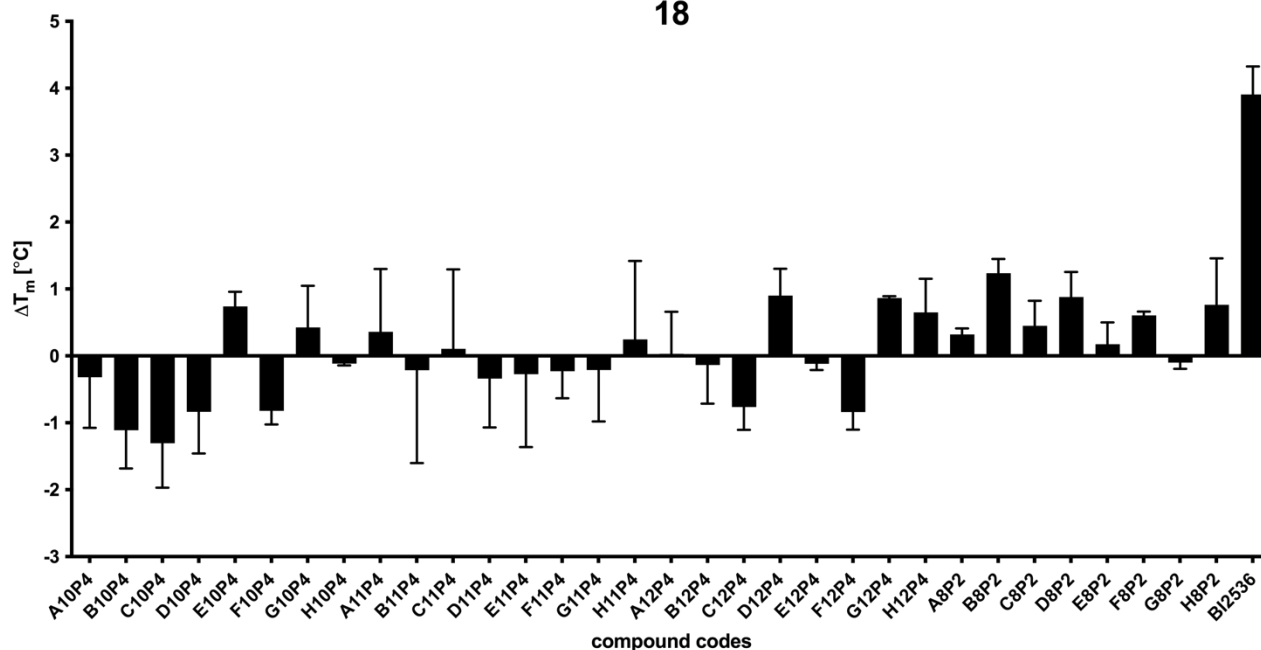

**Figure S-25.** Plate 18. Binding of compounds (150  $\mu$ M) from the Maybridge Fragment Library to *Sm*BRD3(2) monitored by means of a differential scanning fluorimetry (DSF) setup (n = 2). BI2536 (7, 150  $\mu$ M) was used as a positive control. Mean values  $\pm$  standard deviation are shown.

**Table S-2.**  $K_d$  values and N numbers of compounds tested for binding to *SmBRD3(1,2)* and *SmBRD3(2)* using Isothermal Titration Calorimetry (ITC). Values are  $n=1 \pm$  error of the curve of fit.

| Compound Name / Number | Binding to <i>SmBRD3(1,2)</i> |                    |
|------------------------|-------------------------------|--------------------|
|                        | $K_d$ (nM)                    | N                  |
| OXFBD02 (1)            | $683 \pm 166$                 | $1.61 \pm 3.3e-2$  |
| OXFBD03 (2)            | $675 \pm 97.6$                | $1.17 \pm 1.7e-2$  |
| <b>3</b>               | $1750 \pm 301$                | $1.05 \pm 3.9e-2$  |
| OXFBD04 (4)            | $2950 \pm 261$                | $1.39 \pm 2.0e-2$  |
| (+)-JQ1 (5)            | $445 \pm 106$                 | $3.87 \pm 7.0 e-2$ |
| I-BET151 (6)           | $2830 \pm 283$                | $2.63 \pm 3.8e-2$  |
| BI2536 (7)             | $1990 \pm 277$                | $3.39 \pm 6.3e-2$  |
| I-BET726 (8)           | $1520 \pm 520$                | $1.66 \pm 6.7e-2$  |
| <b>10</b>              | No binding                    | -                  |

**Table S-3.**  $K_d$  values and N numbers of compounds tested by Isothermal Titration Calorimetry (ITC) for binding to *SmBRD3(1,2)* and *SmBRD3(2)*.  
s.e.m. = standard error of the mean.

| Binding to <i>SmBRD3(2)</i> |            |               |            |               |            |               |            |               |        |         |
|-----------------------------|------------|---------------|------------|---------------|------------|---------------|------------|---------------|--------|---------|
| Compound Name/Number        | Repeat 1   |               | Repeat 2   |               | Repeat 3   |               | Mean       |               | s.e.m. |         |
|                             | $K_d$ (nM) | N             | $K_d$ (nM) | N             | $K_d$ (nM) | N             | $K_d$ (nM) | N             | $K_d$  | N       |
| OXFBD02 (1)                 | No binding | -             | -          | -             | -          | -             | No binding | n/a           | n/a    | n/a     |
| OXFBD03 (2)                 | No binding | -             | -          | -             | -          | -             | No binding | n/a           | n/a    | n/a     |
| 3                           | No binding | -             | -          | -             | -          | -             | No binding | n/a           | n/a    | n/a     |
| OXFBD04 (4)                 | No binding | -             | -          | -             | -          | -             | No binding | n/a           | n/a    | n/a     |
| (+)-JQ1 (5)                 | No binding | -             | -          | -             | -          | -             | No binding | n/a           | n/a    | n/a     |
| I-BET151 (6)                | 6160 ± 785 | 1.43 ± 2.7e-2 | -          | -             | -          | -             | 6160 ± 785 | 1.43 ± 2.7e-2 | n/a    | n/a     |
| BI2536 (7)                  | 3810 ± 576 | 1.46 ± 2.9e-2 | -          | -             | -          | -             | 3810 ± 576 | 1.46 ± 2.9e-2 | n/a    | n/a     |
| I-BET726 (8)                | 1850 ± 361 | 1.12 ± 4.2e-2 | -          | -             | -          | -             | 1850 ± 361 | 1.12 ± 4.2e-2 | n/a    | n/a     |
| 9                           | 572 ± 103  | 1.52 ± 2.2e-2 | 778 ± 179  | 1.57 ± 3.4e-2 | 753 ± 176  | 1.64 ± 3.3e-2 | 701        | 1.58          | 64.9   | 3.50e-2 |
| 10                          | No binding | -             | -          | -             | -          | -             | No binding | n/a           | n/a    | n/a     |
| 11                          | 1060 ± 164 | 1.54 ± 2.5e-2 | 1300 ± 236 | 1.49 ± 3.0e-2 | -          | -             | 1180       | 1.52          | 120    | 5.00e-3 |
| 12                          | 562 ± 79.1 | 1.51 ± 1.8e-2 | 543 ± 60.3 | 1.55 ± 1.4e-2 | -          | -             | 553        | 1.53          | 9.5    | 2.00e-2 |
| 13                          | 628 ± 94.9 | 1.52 ± 2.0e-2 | 652 ± 78.5 | 1.71 ± 1.8e-2 | 672 ± 76.0 | 1.60 ± 1.6e-2 | 651        | 1.61          | 12.7   | 5.50e-2 |
| 14                          | 1010 ± 160 | 1.42 ± 2.4e-2 | 1270 ± 779 | 1.54 ± 0.101  | 1270 ± 349 | 1.49 ± 5.4e-2 | 1183       | 1.48          | 86.7   | 3.50e-2 |
| 15                          | 320 ± 82.8 | 1.48 ± 2.5e-2 | 361 ± 70.2 | 1.51 ± 2.0e-2 | 411 ± 60.4 | 1.69 ± 1.8e-2 | 364        | 1.56          | 26.3   | 6.60e-2 |
| 16                          | No binding | -             | -          | -             | -          | -             | No binding | n/a           | n/a    | n/a     |
| 17                          | No binding | -             | -          | -             | -          | -             | No binding | n/a           | n/a    | n/a     |
| 18                          | No binding | -             | -          | -             | -          | -             | No binding | n/a           | n/a    | n/a     |
| 19                          | No binding | -             | -          | -             | -          | -             | No binding | n/a           | n/a    | n/a     |
| 20                          | No binding | -             | -          | -             | -          | -             | No binding | n/a           | n/a    | n/a     |
| 21                          | No binding | -             | -          | -             | -          | -             | No binding | n/a           | n/a    | n/a     |
| 22                          | No binding | -             | -          | -             | -          | -             | No binding | n/a           | n/a    | n/a     |

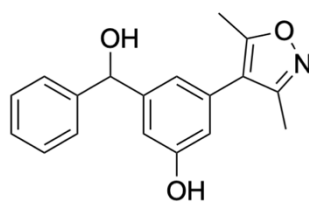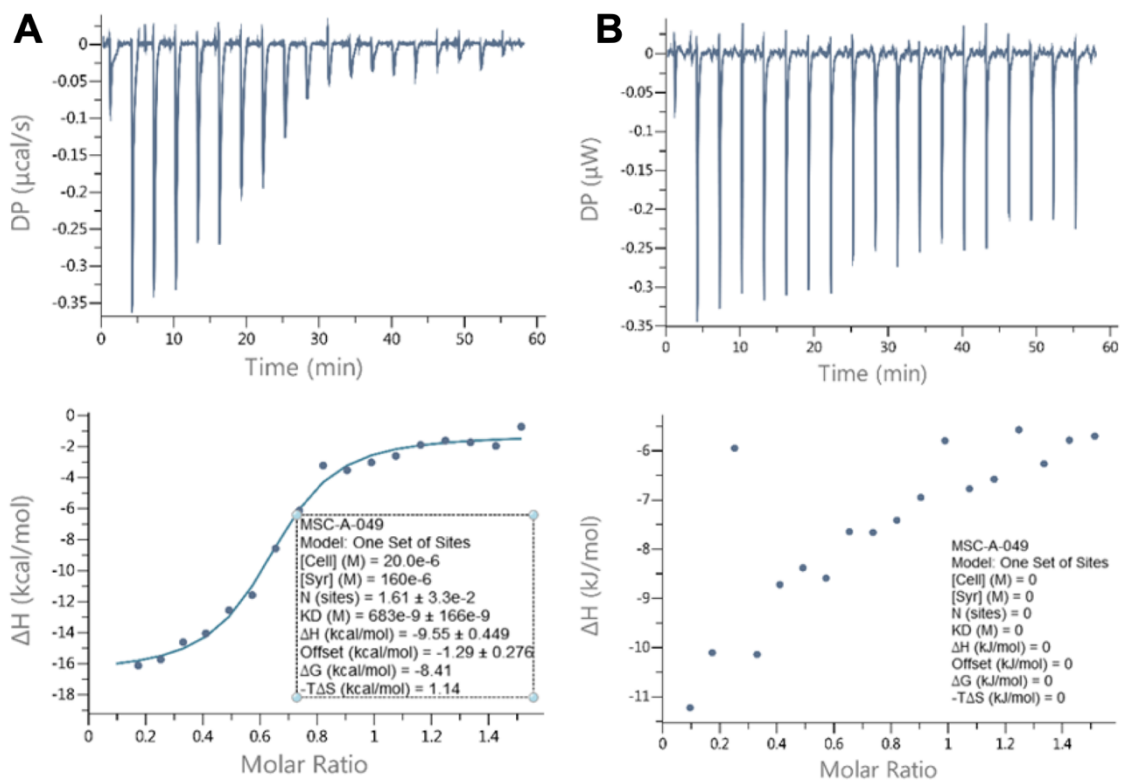

**Figure S-26. A.** Isothermal Titration Calorimetry (ITC) trace of OXFBD02 (1) and *SmBRD3*(1,2) ( $K_d = 683 \pm 166$  nM). **B.** ITC trace of OXFBD02 (1) and *SmBRD3*(2) (No detectable binding).

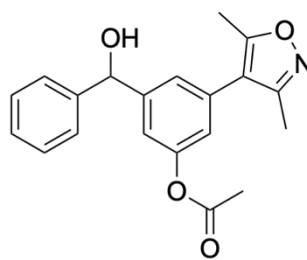

OXFBD03 (2)

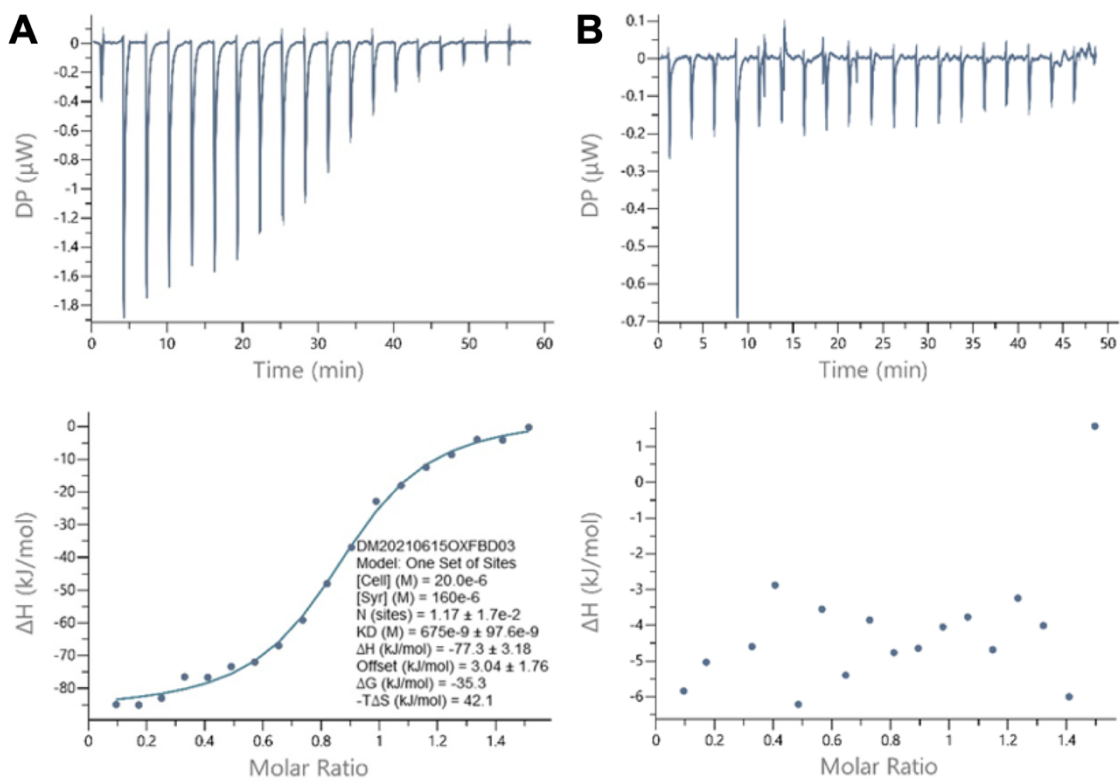

**Figure S-27. A.** Isothermal Titration Calorimetry (ITC) trace of OXFBD03 (2) and *SmBRD3*(1,2) ( $K_d = 675 \pm 97.6$  nM). **B.** ITC trace of OXFBD03 (2) and *SmBRD3*(2) (No detectable binding).

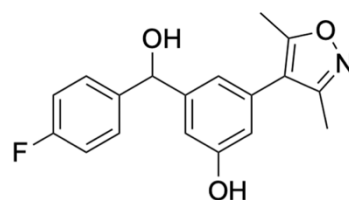

3

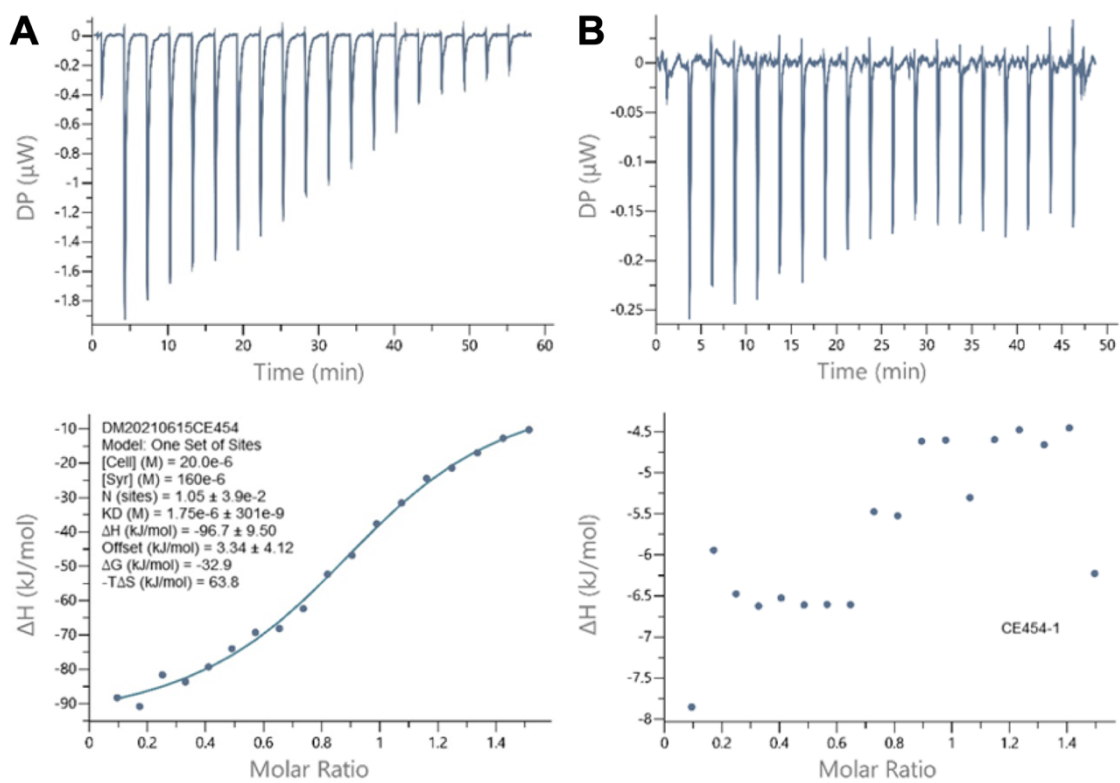

**Figure S-28. A.** Isothermal Titration Calorimetry (ITC) trace of **3** and *SmBRD3*(1,2) ( $K_d = 1750 \pm 301$  nM). **B.** ITC trace of **3** and *SmBRD3*(2) (No detectable binding).

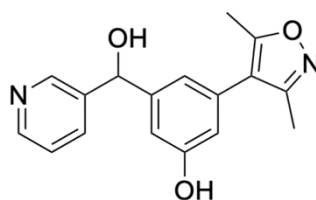

OXFBD04 (4)

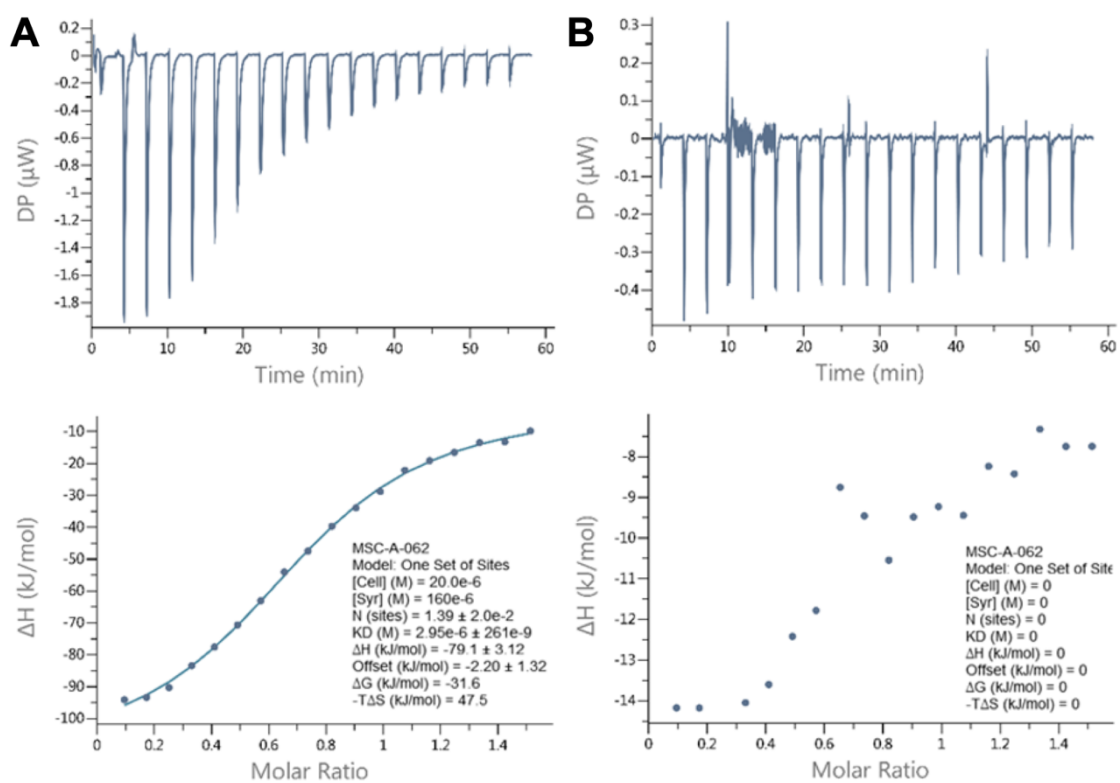

**Figure S-29. A.** Isothermal Titration Calorimetry (ITC) trace of OXFBD04 (4) and *Sm*BRD3(1,2) ( $K_d = 2950 \pm 261$  nM). **B.** ITC trace of OXFBD04 (4) and *Sm*BRD3(2) (No detectable binding).

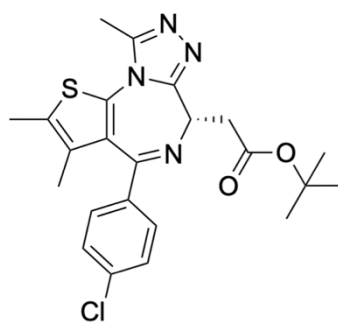

(+)-JQ1 (5)

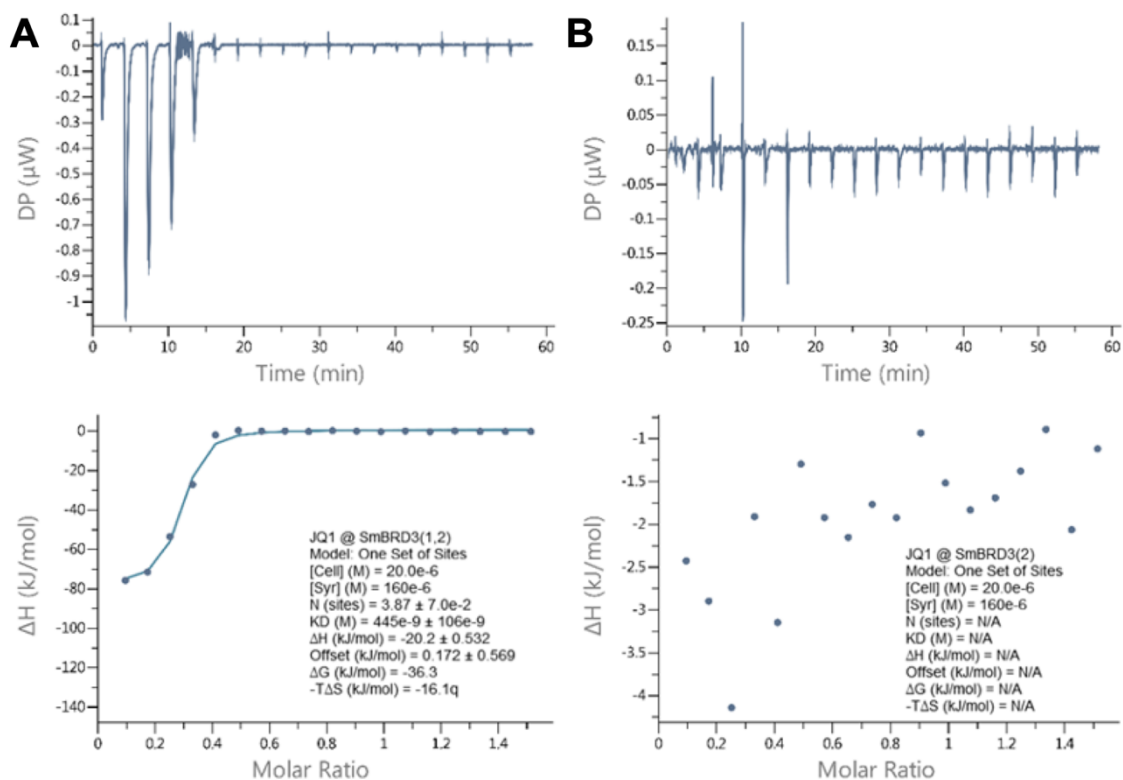

**Figure S-30. A.** Isothermal Titration Calorimetry (ITC) trace of (+)-JQ1 (5) and *SmBRD3*(1,2) ( $K_d = 445 \pm 106$  nM) **B.** ITC trace of (+)-JQ1 (5) and *SmBRD3*(2) (No detectable binding).



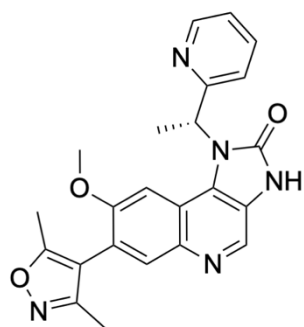

I-BET151 (6)

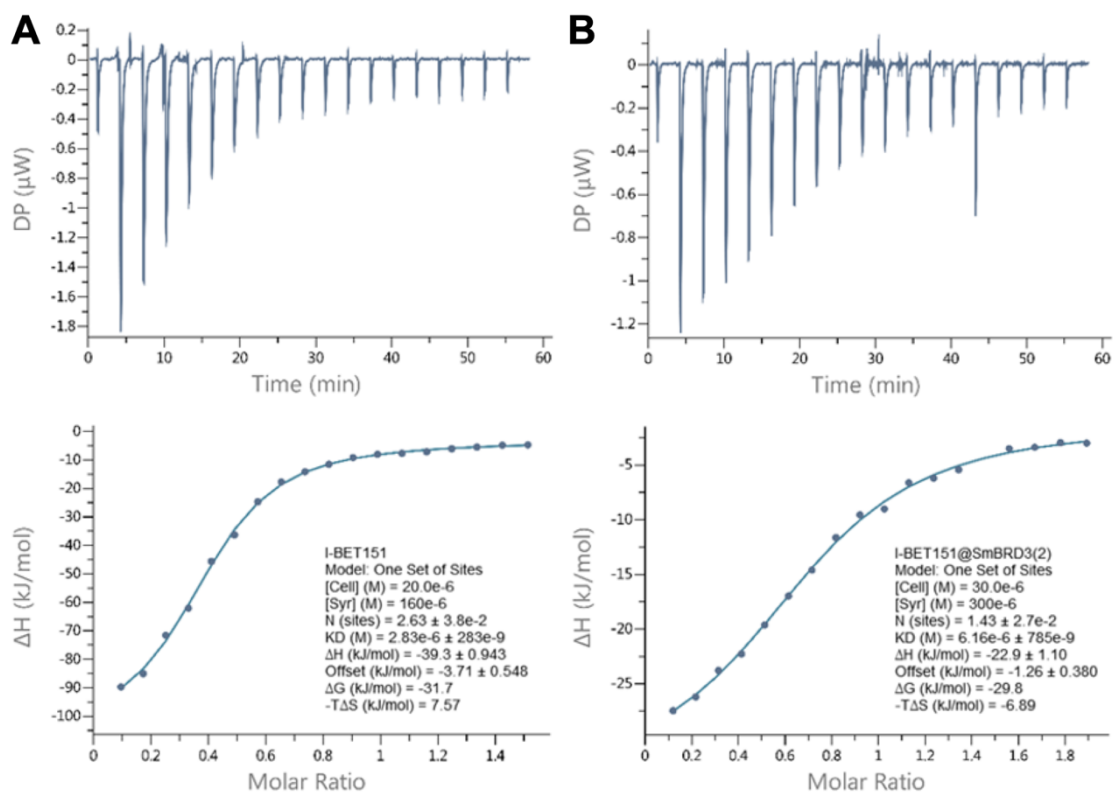

**Figure S-31. A.** Isothermal Titration Calorimetry (ITC) trace of I-BET151 (6) and *SmBRD3*(1,2) ( $K_d = 2830 \pm 283$  nM). **B.** ITC trace of I-BET151 (6) and *SmBRD3*(2) ( $K_d = 6160 \pm 785$  nM).

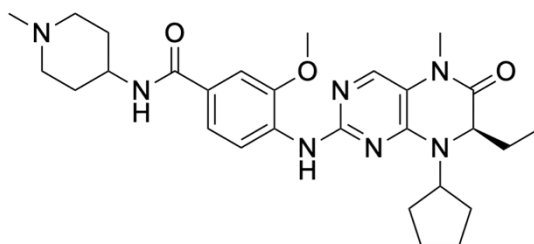

BI-2536 (7)

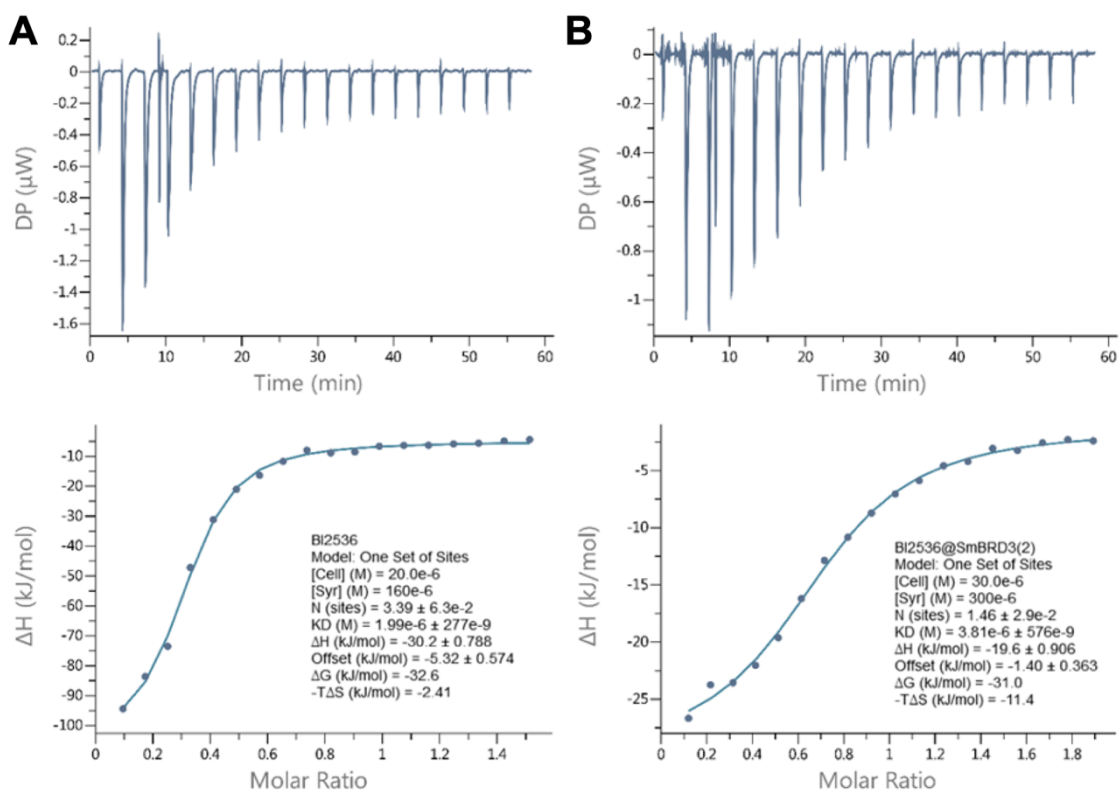

**Figure S-32. A.** Isothermal Titration Calorimetry (ITC) trace of BI-2536 (7) and *SmBRD3*(1,2) ( $K_d = 1990 \pm 277$  nM). **B.** ITC trace of BI-2536 (7) and *SmBRD3*(2) ( $K_d = 3810 \pm 576$  nM).

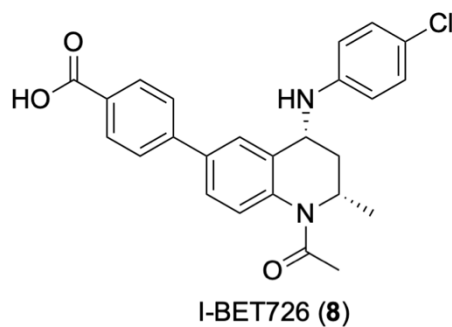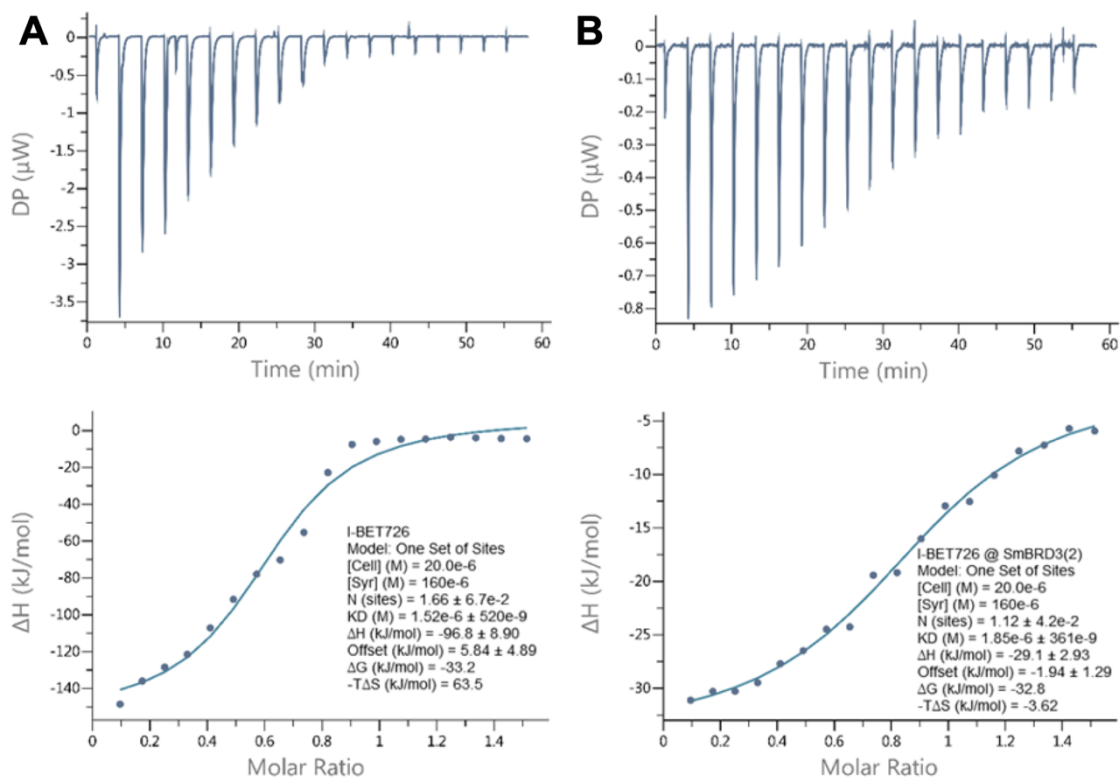

**Figure S-33. A.** Isothermal Titration Calorimetry (ITC) trace of I-BET726 (**8**) and *SmBRD3*(1,2) ( $K_d = 1520 \pm 520$  nM). **B.** ITC trace of I-BET726 (**8**) and *SmBRD3*(2) ( $K_d = 1850 \pm 361$  nM).

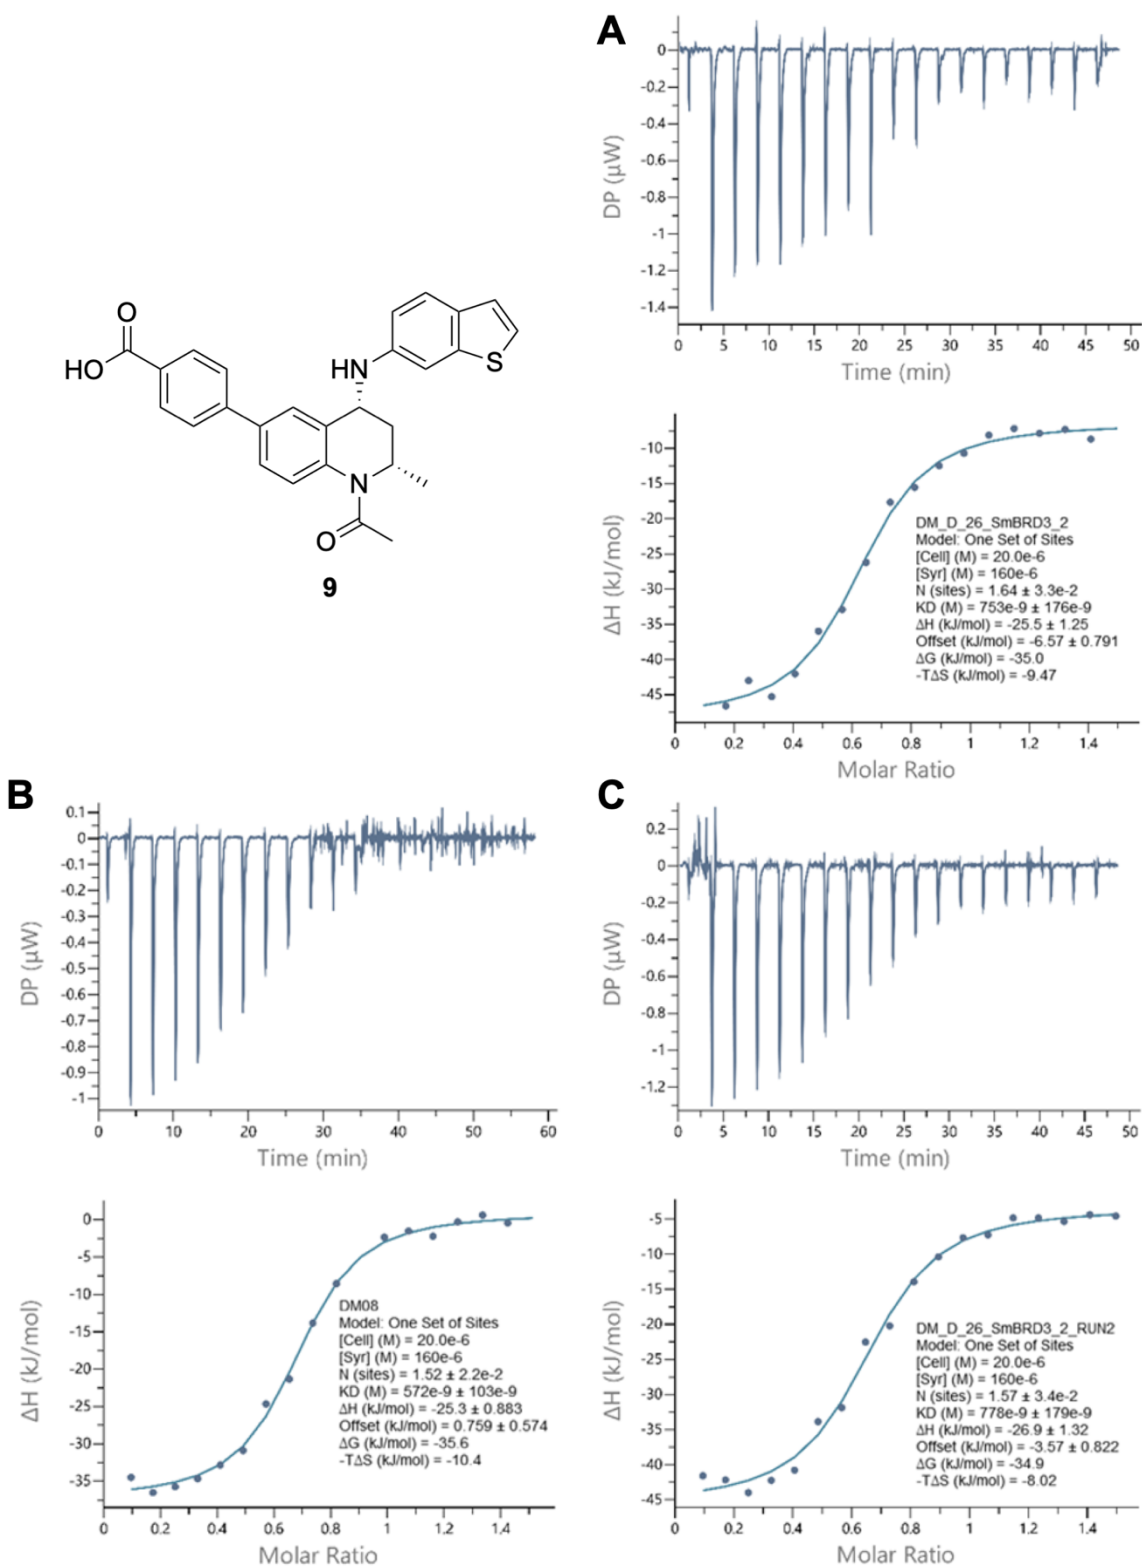

**Figure S-34. A.** Isothermal Titration Calorimetry (ITC) trace of **9** and SmBRD3(2) ( $K_d = 753 \pm 176$  nM). **B.** ITC trace of **9** and SmBRD3(2) ( $K_d = 572 \pm 103$  nM). **C.** ITC trace of **9** and SmBRD3(2) ( $K_d = 778 \pm 179$  nM).

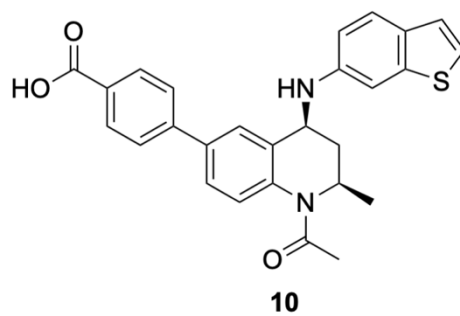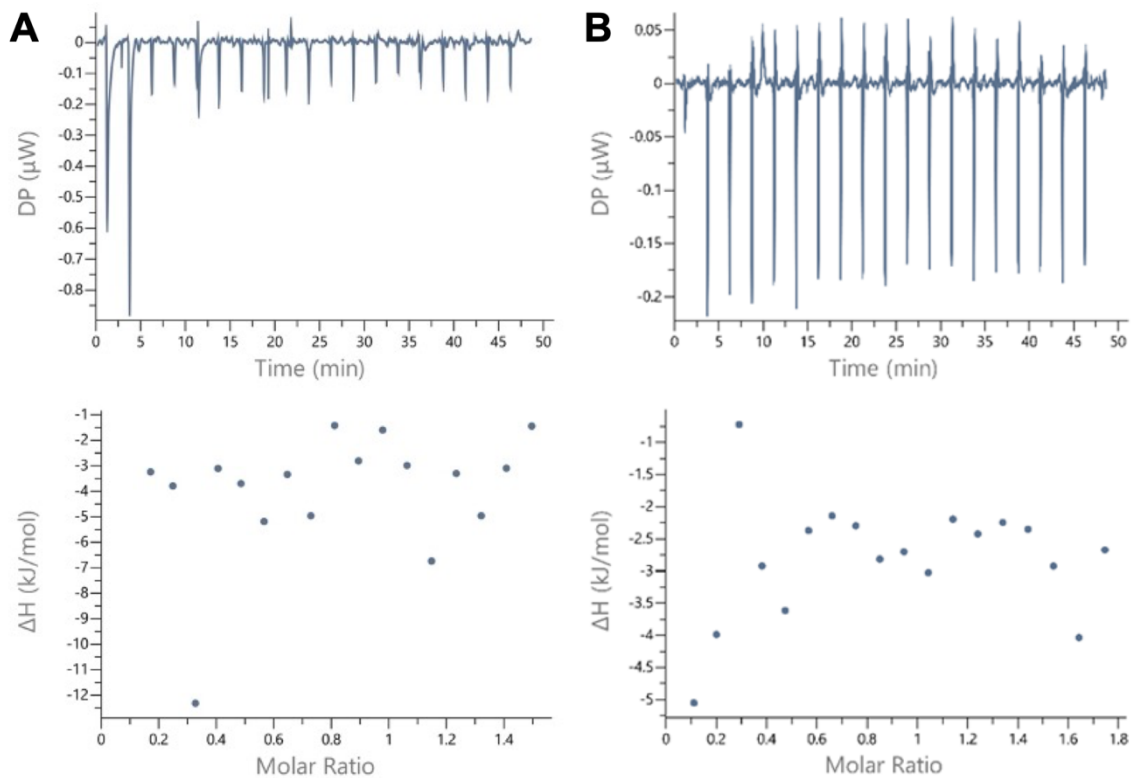

**Figure S-35. A.** Isothermal Titration Calorimetry (ITC) trace of **10** and *SmBRD3(1,2)* (No detectable binding). **B.** Isothermal Titration Calorimetry (ITC) trace of **10** and *SmBRD3(2)* (No detectable binding).

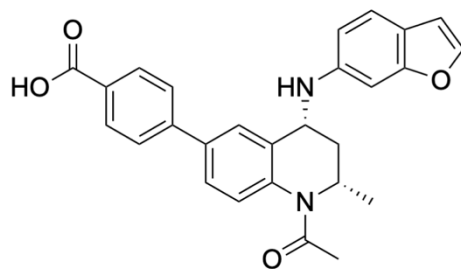

11

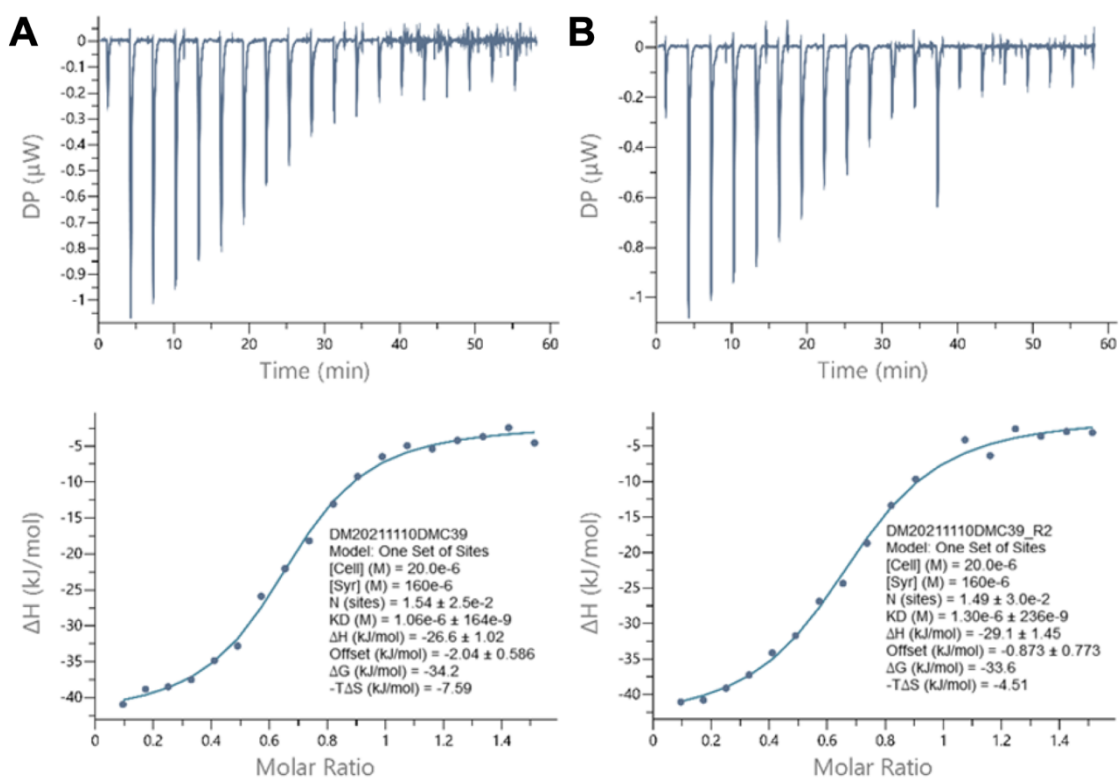

**Figure S-36. A.** Isothermal Titration Calorimetry (ITC) trace of **11** and *SmBRD3(2)* ( $K_d = 1060 \pm 164$  nM). **B.** ITC trace of **11** and *SmBRD3(2)* ( $K_d = 1300 \pm 236$  nM).

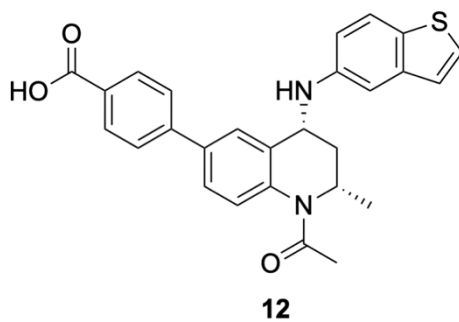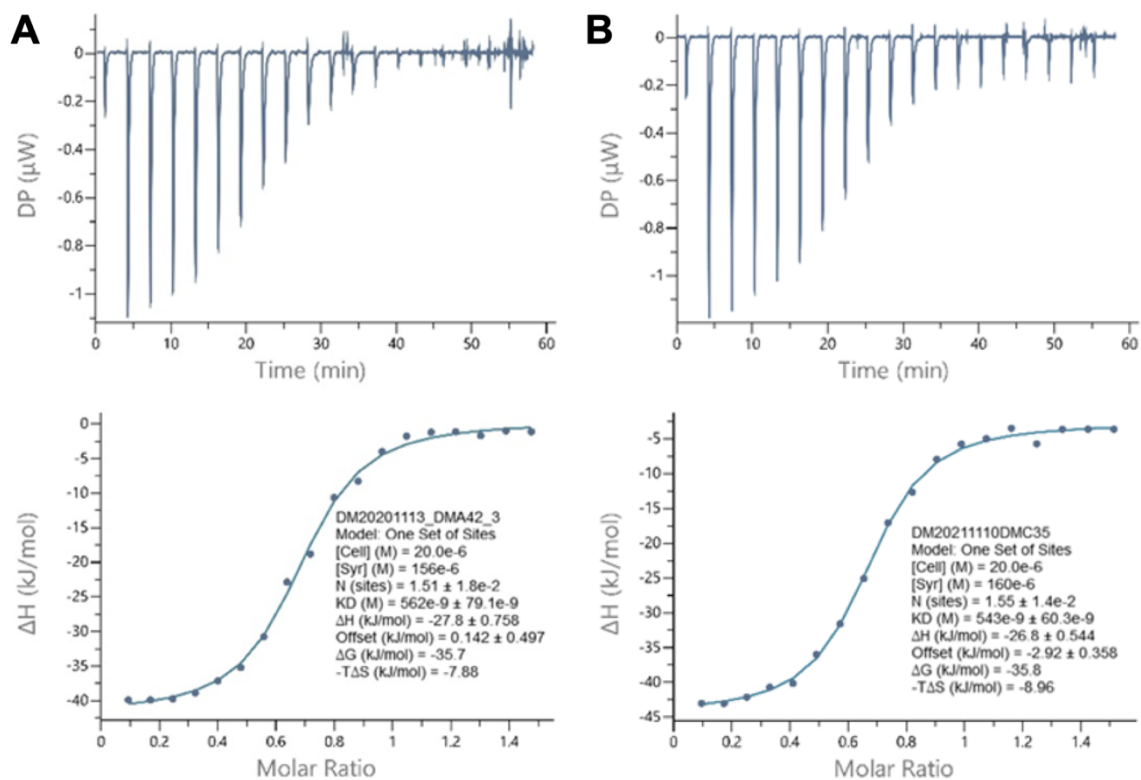

**Figure S-37. A.** Isothermal Titration Calorimetry (ITC) trace of **12** and *SmBRD3(2)* ( $K_d = 562 \pm 79.1$  nM). **B.** ITC trace of **12** and *SmBRD3(2)* ( $K_d = 543 \pm 60.3$  nM).

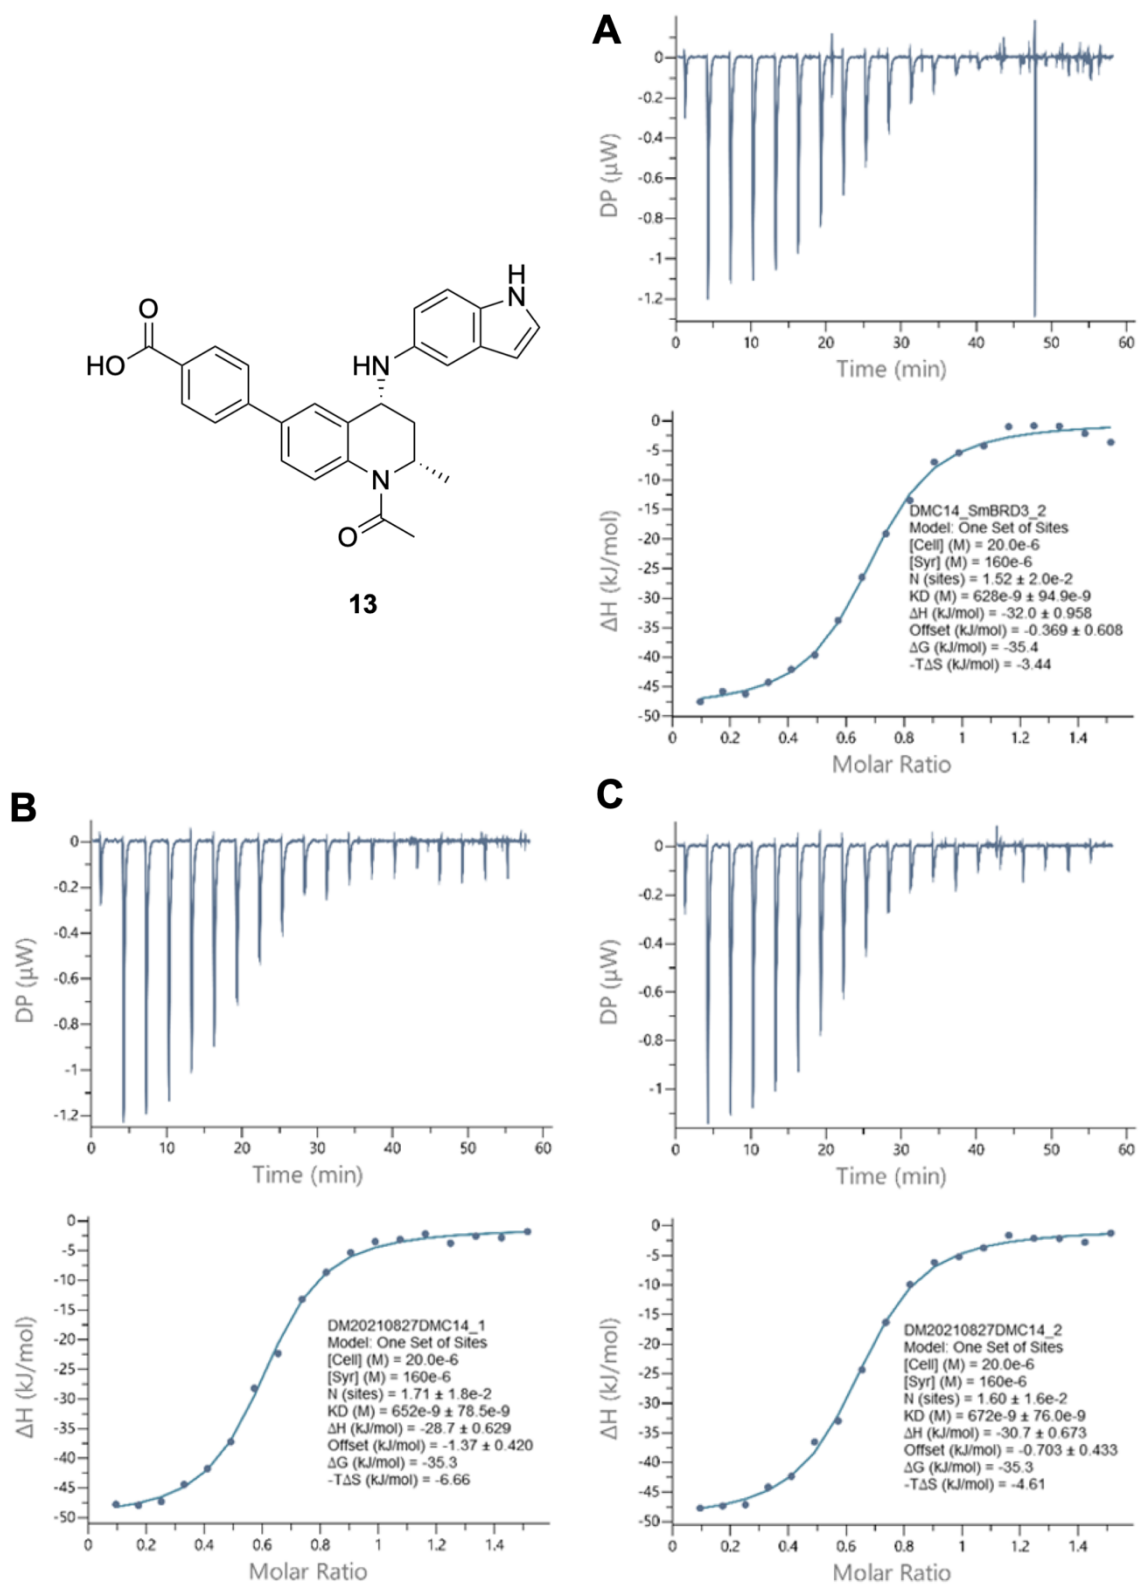

**Figure S-38. A.** Isothermal Titration Calorimetry (ITC) trace of **13** and *SmBRD3(2)* ( $K_d = 628 \pm 94.9$  nM). **B.** ITC trace of **13** and *SmBRD3(2)* ( $K_d = 652 \pm 78.5$  nM). **C.** ITC trace of **13** and *SmBRD3(2)* ( $K_d = 672 \pm 76.0$  nM).



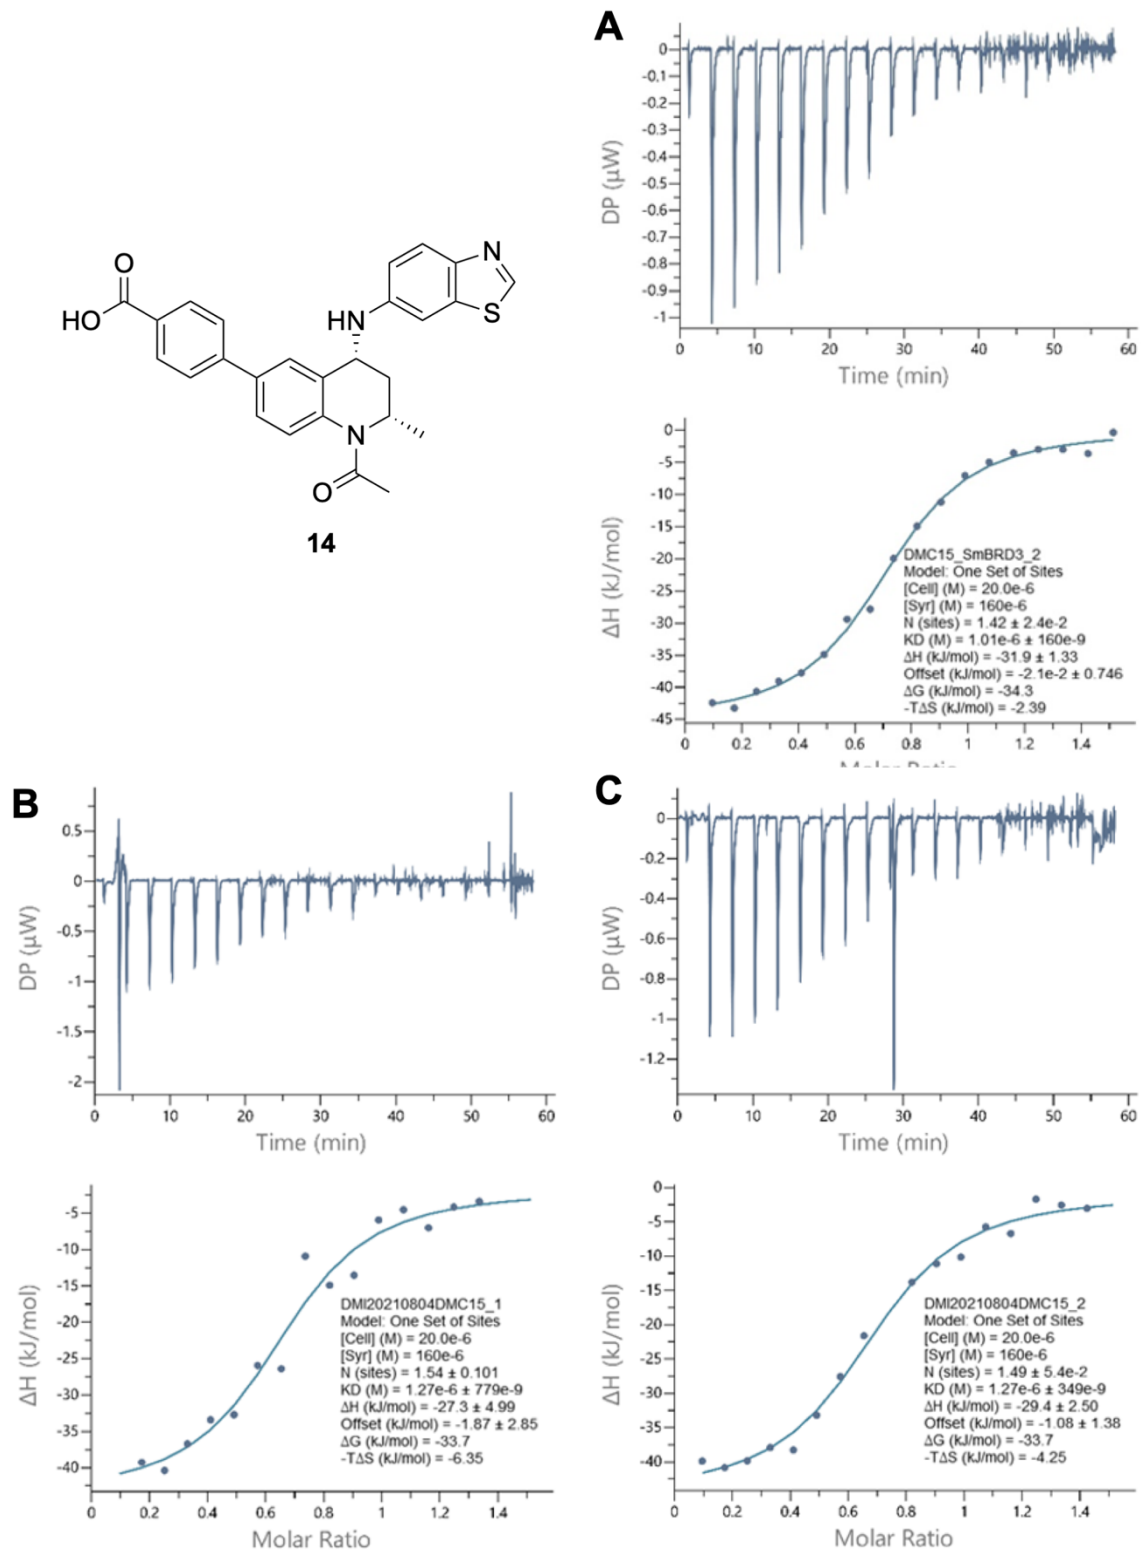

**Figure S-39. A.** Isothermal Titration Calorimetry (ITC) trace of **14** and SmBRD3(2) ( $K_d = 1010 \pm 160$  nM). **B.** ITC trace of **14** and SmBRD3(2) ( $K_d = 1270 \pm 779$  nM). **C.** ITC trace of **14** and SmBRD3(2) ( $K_d = 1270 \pm 349$  nM).

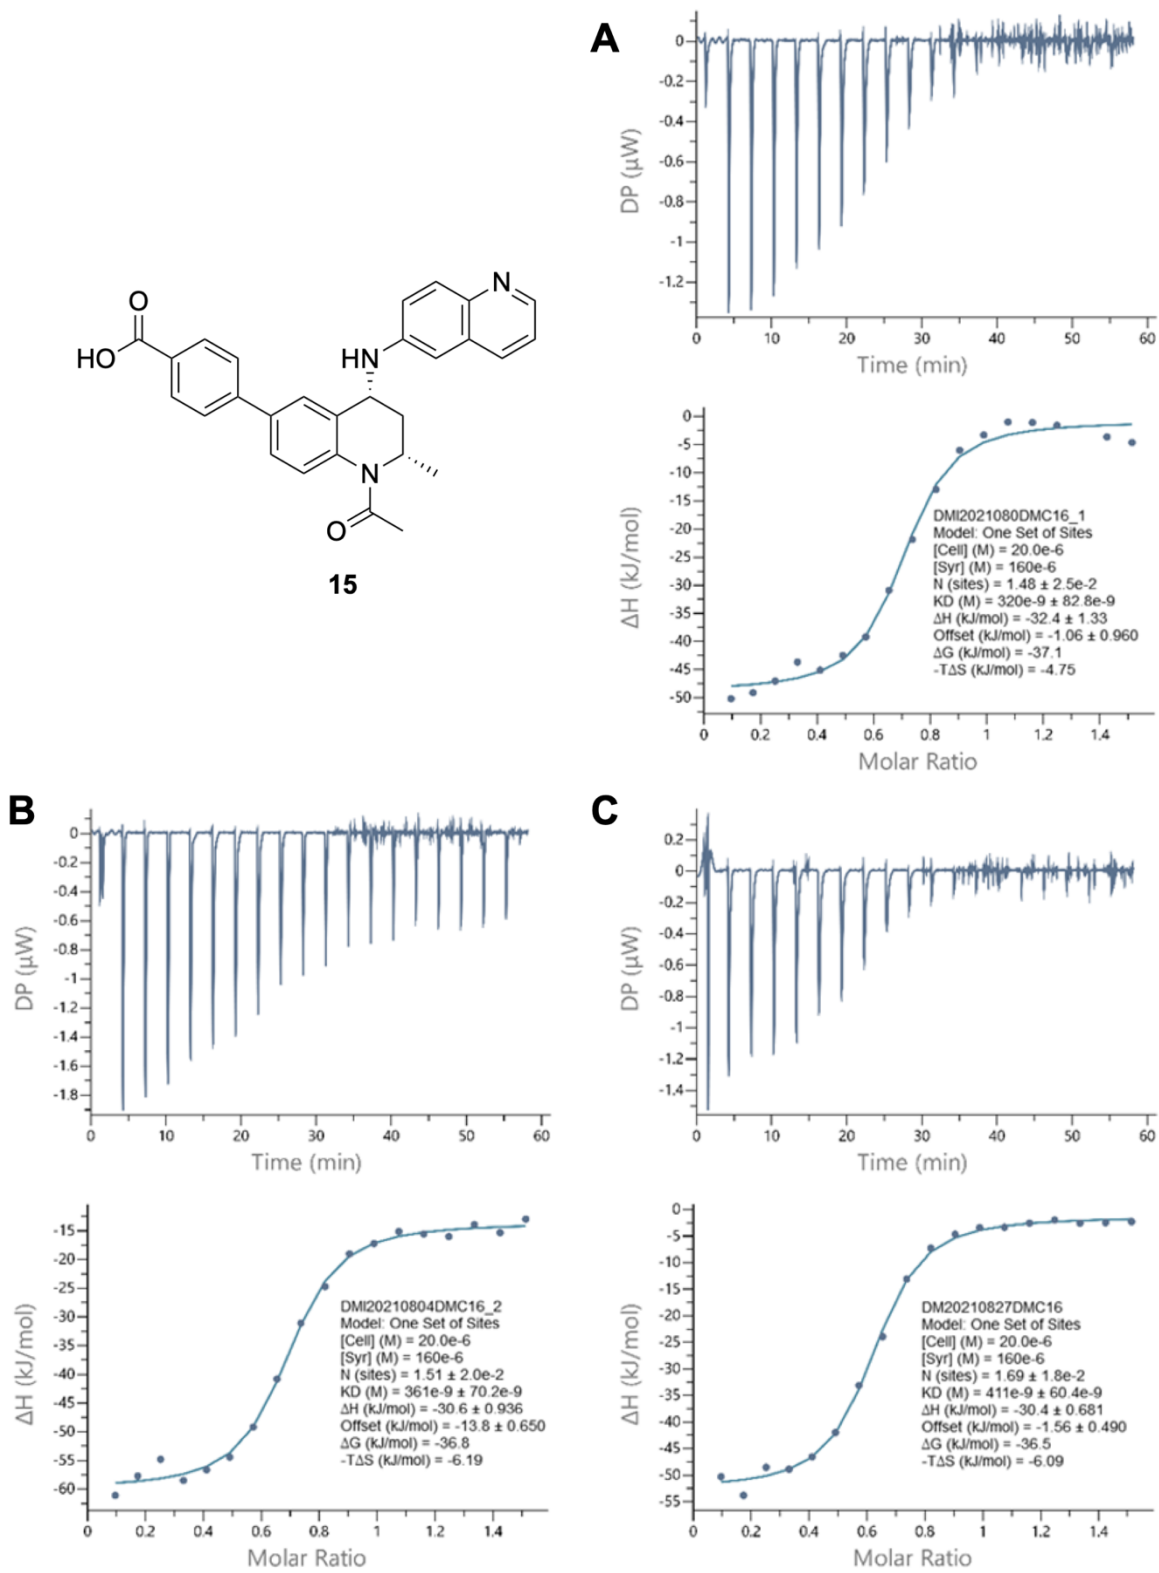

**Figure S-40. A.** Isothermal Titration Calorimetry (ITC) trace of **15** and SmBRD3(2) ( $K_d = 320 \pm 82.8$  nM). **B.** ITC trace of **15** and SmBRD3(2) ( $K_d = 361 \pm 70.2$  nM). **C.** ITC trace of **15** and SmBRD3(2) ( $K_d = 411 \pm 60.4$  nM).

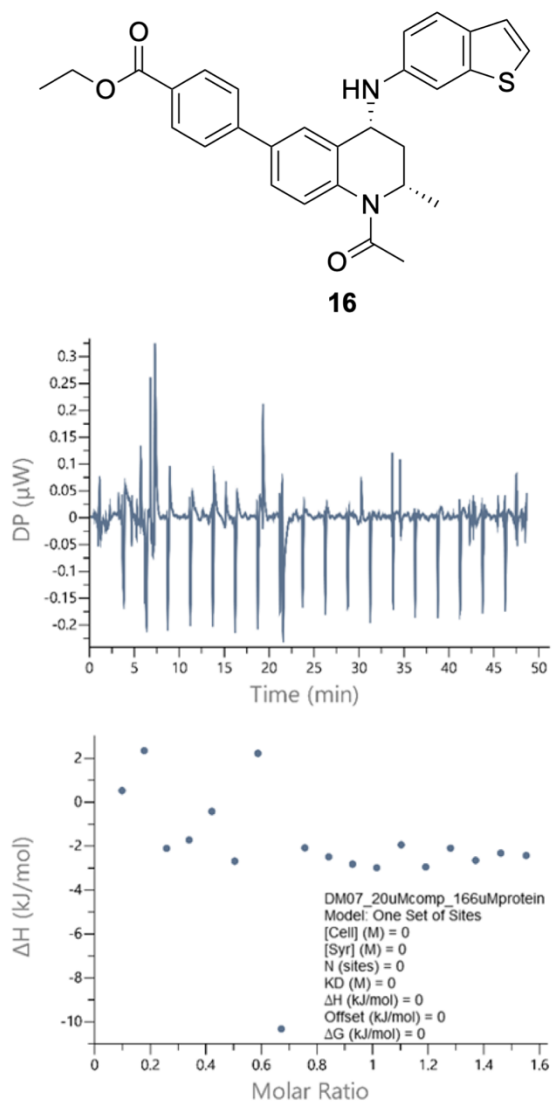

**Figure S-41.** Isothermal Titration Calorimetry (ITC) trace of **16** and *Sm*BRD3(2) (No detectable binding).

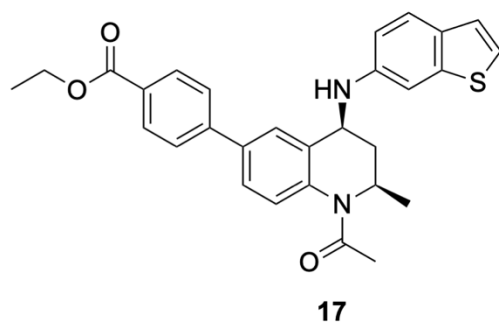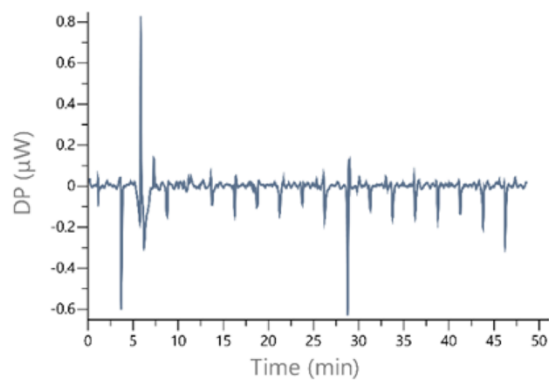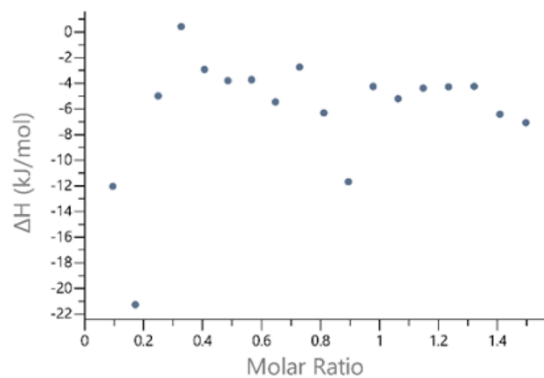

**Figure S-42.** Isothermal Titration Calorimetry (ITC) trace of **17** and *Sm*BRD3(2) (No detectable binding).

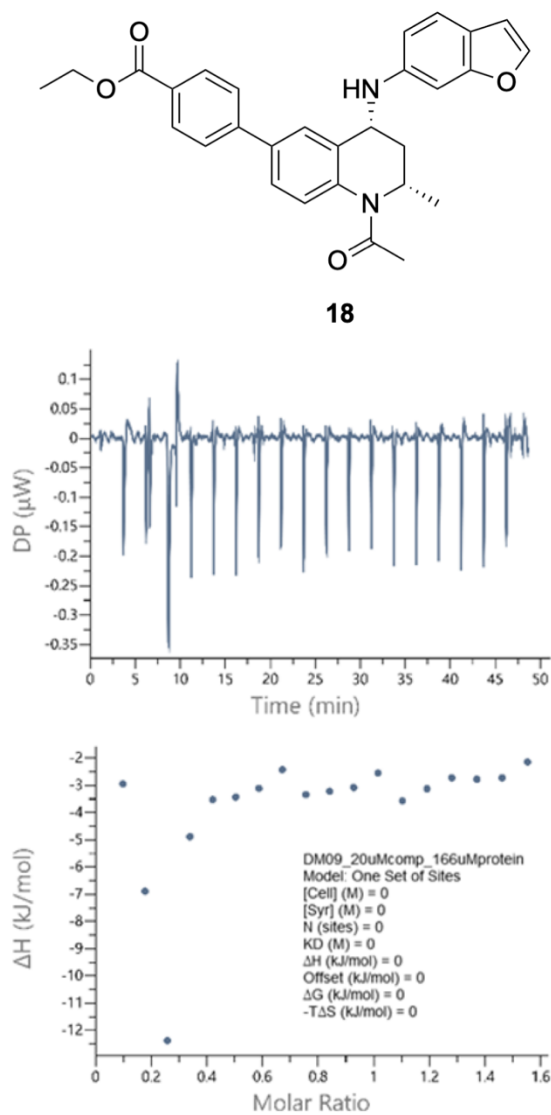

**Figure S-43.** Isothermal Titration Calorimetry (ITC) trace of **18** and *Sm*BRD3(2) (No detectable binding).

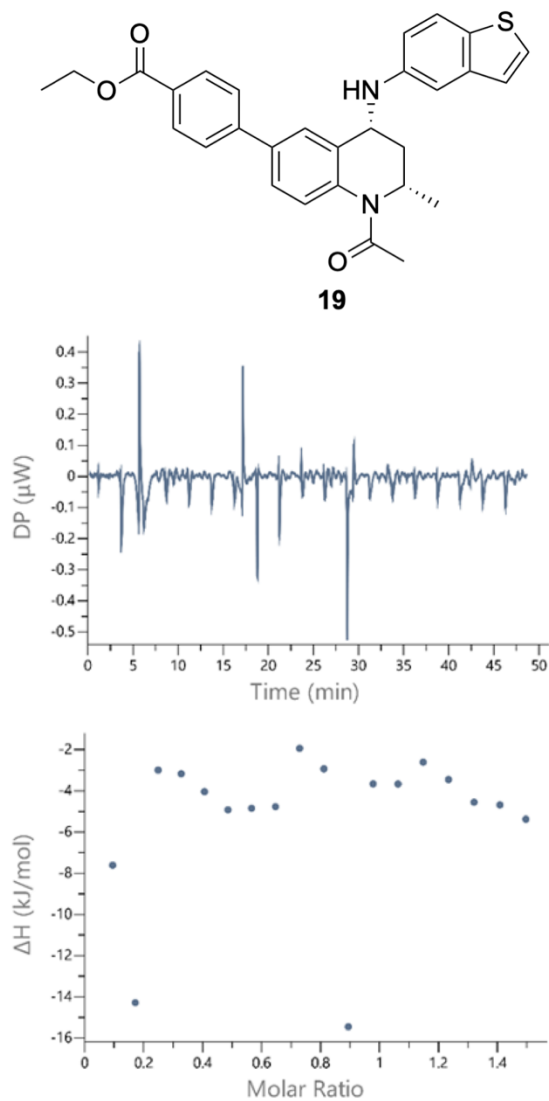

**Figure S-44.** Isothermal Titration Calorimetry (ITC) trace of **19** and *Sm*BRD3(2) (No detectable binding).

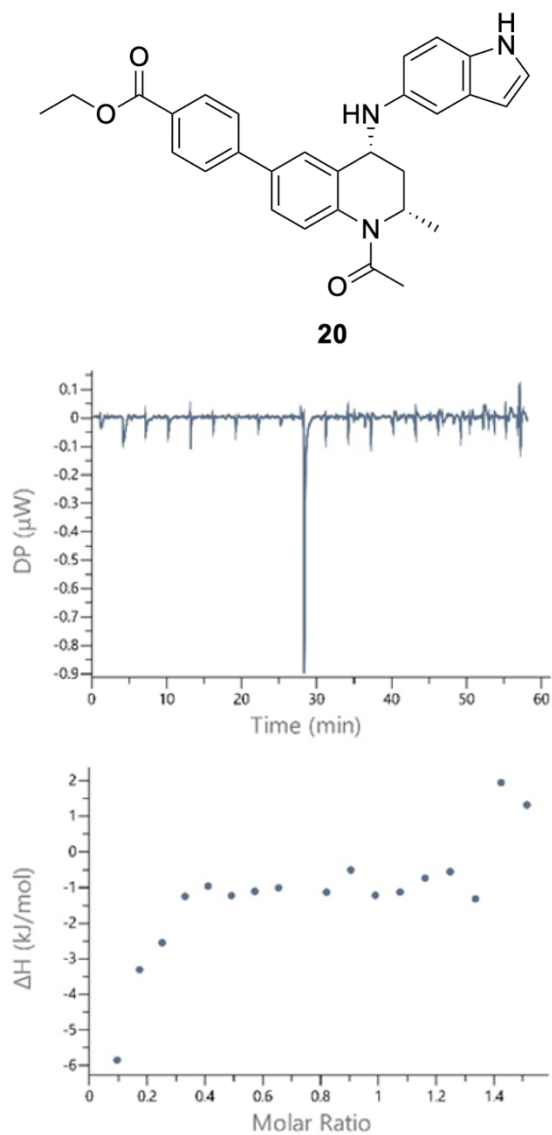

**Figure S-45.** Isothermal Titration Calorimetry (ITC) trace of **20** and SmBRD3(2) (No detectable binding).

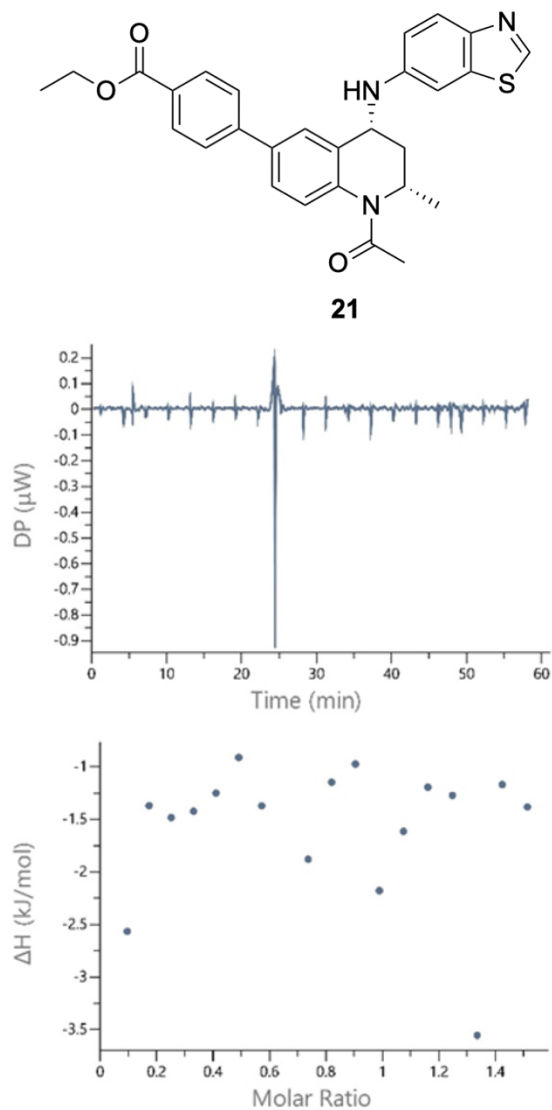

**Figure S-46.** Isothermal Titration Calorimetry (ITC) trace of **21** and *Sm*BRD3(2) (No detectable binding).



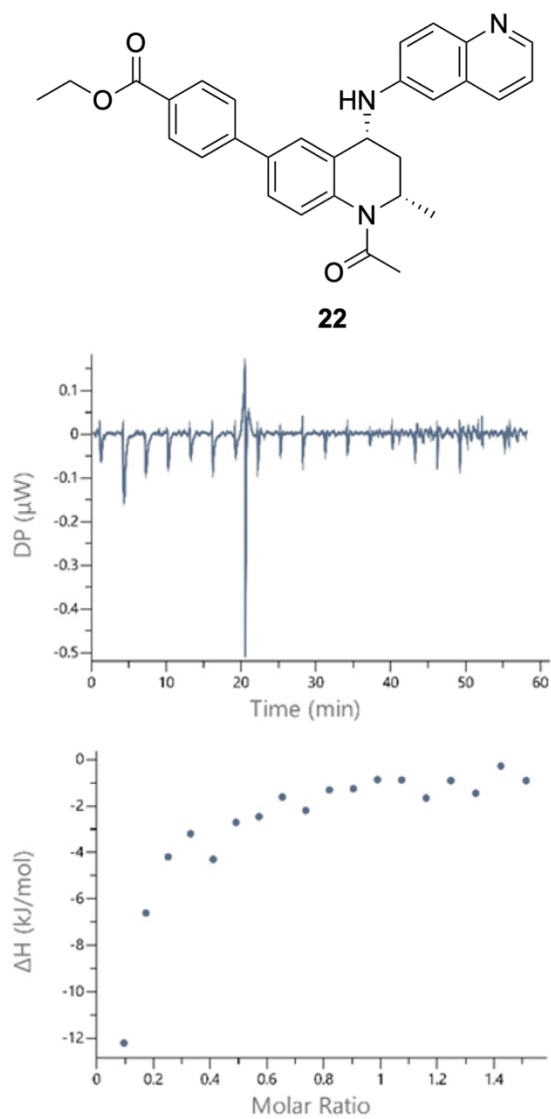

**Figure S-47.** Isothermal Titration Calorimetry (ITC) trace of **22** and *Sm*BRD3(2) (No detectable binding).

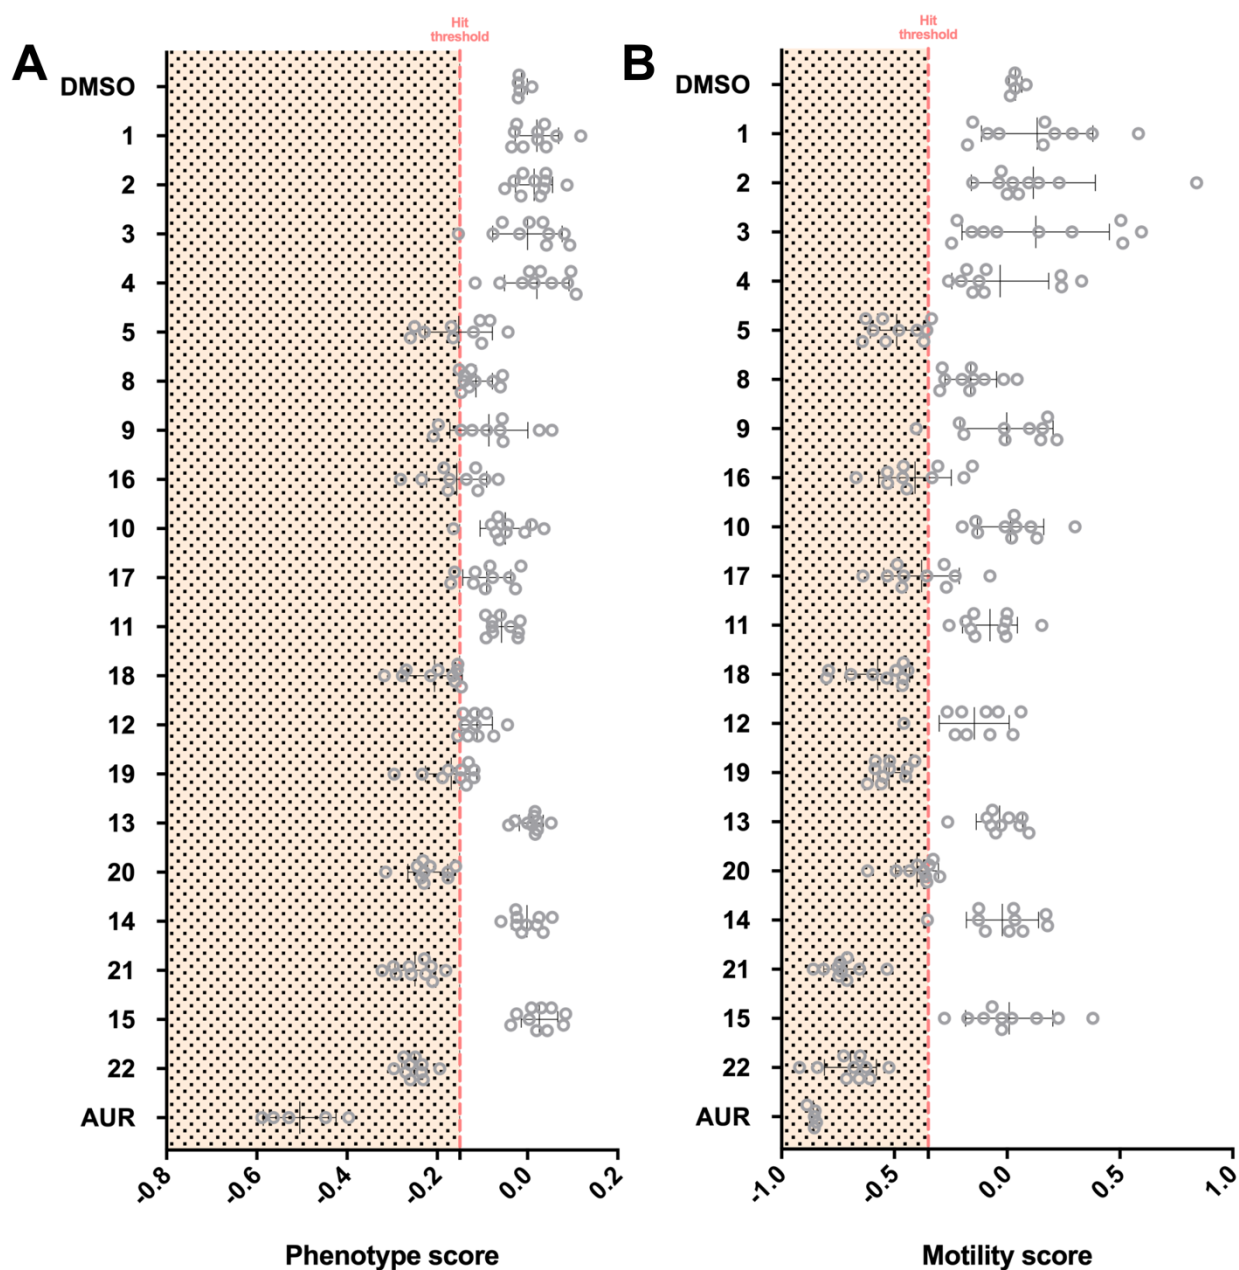

**Figure S-48.** The effect of compounds **1–5** and **8–22** on the **(A)** phenotype and **(B)** motility of schistosomula tested at 10  $\mu$ M in 0.625% DMSO, following 72 h incubation. Negative (0.625% DMSO) and positive (10  $\mu$ M auranofin in 0.625% DMSO) controls are included in each drug screen (4-5 in total, two technical replicates each). The compound score is shown as grey dot and whiskers represent the average score and standard deviation across the screens. Hit threshold is delineated by the vertical dashed red lines in the graphs;  $-0.15$  and  $-0.35$  for phenotype and motility scores, respectively.

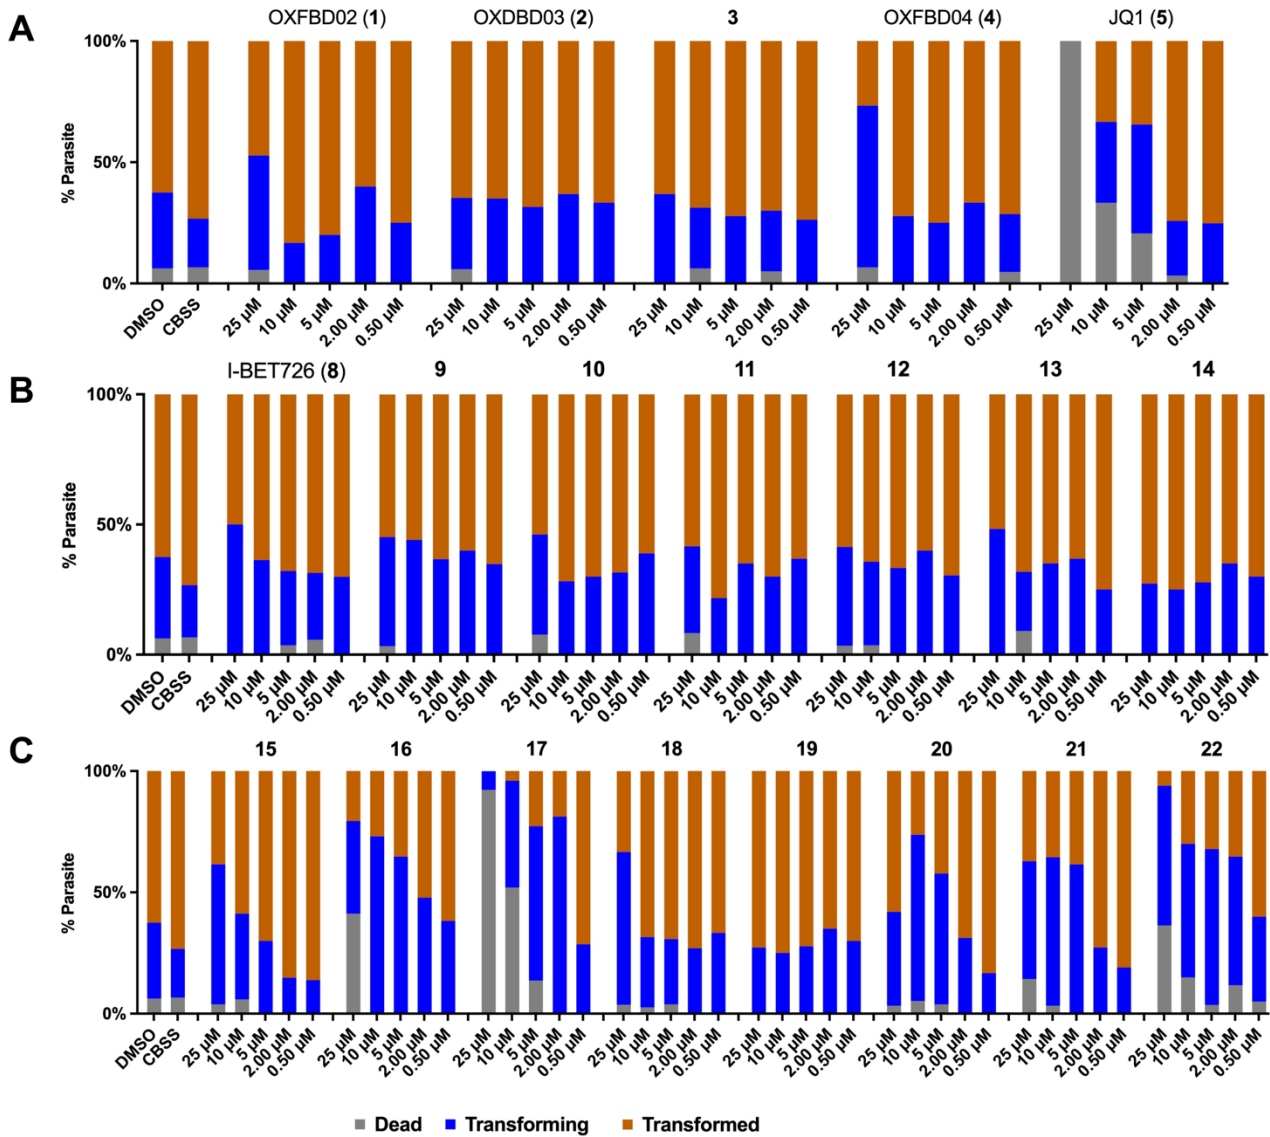

**Figure S-49.** Differential activity of compounds 1–5 (A), 8–14 (B), and 15–22 (C) on *ex vivo* miracidia to sporocyst transformation. Miracidia were exposed to the selected compounds in a dose response titration (CBSS containing 25, 10, 5, 2, or 0.5 μM in 1% DMSO). Dead parasites (in grey), transforming miracidia (in blue) and fully transformed sporocysts (in brown) were enumerated after 48 h (scored as percentage of parasite population - % Parasite). Each titration point was measured in triplicate and compared to parasites cultured in CBSS with 1% DMSO (controls) at a constant temperature of 26 °C, in the dark.

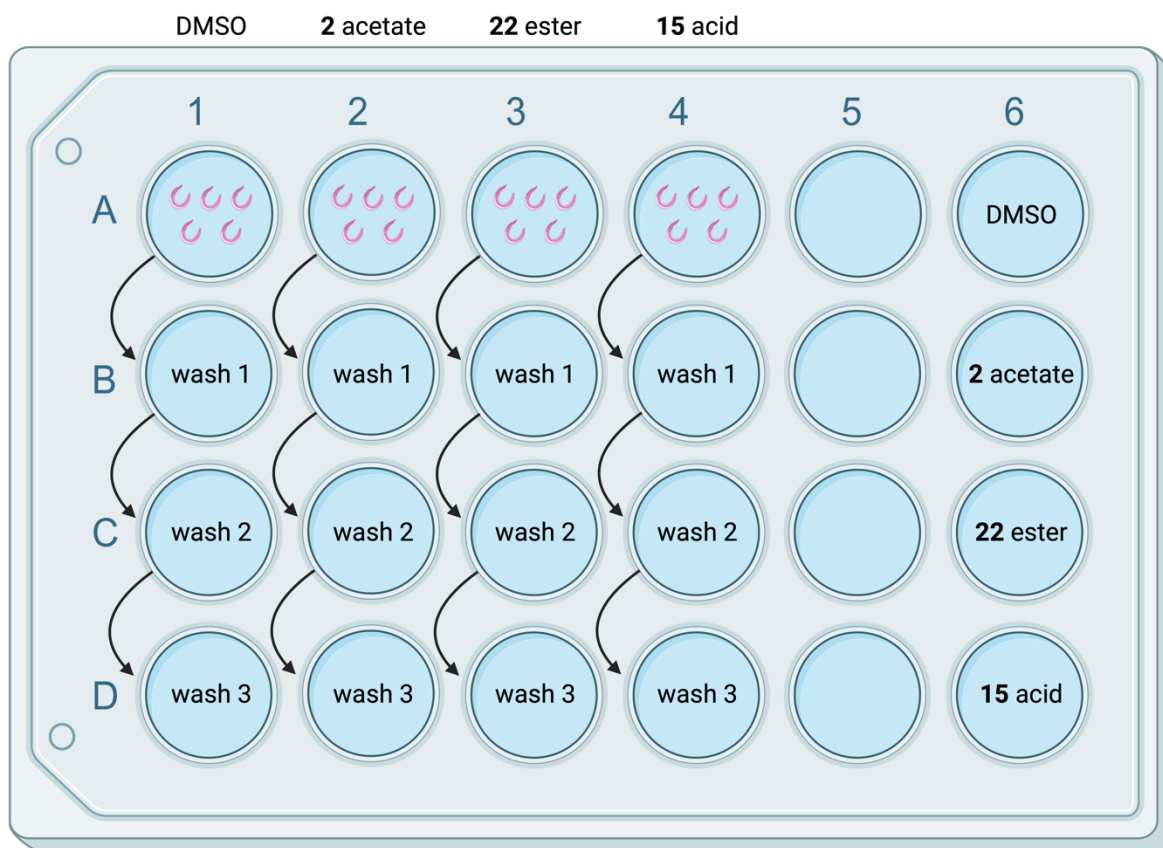

**Figure S-50.** Graphical display of the experimental set up for the compound accumulation assay: 5 male worms per treatment were incubated with 20  $\mu$ M of **1**, **2**, **15**, or **22**, in 0.2% DMSO or 0.2% DMSO only, as indicated, in 2 mL of media for 24 hours. Wells containing media and compound only (no worms) were also incubated. Following incubation, the worms were washed 3 times (by sequential transfer) in wells containing 2 mL of fresh media only (no compound). Worms were then transferred to a 1.5 mL Eppendorf and frozen. 1 mL aliquots of the media from all wells were also collected.

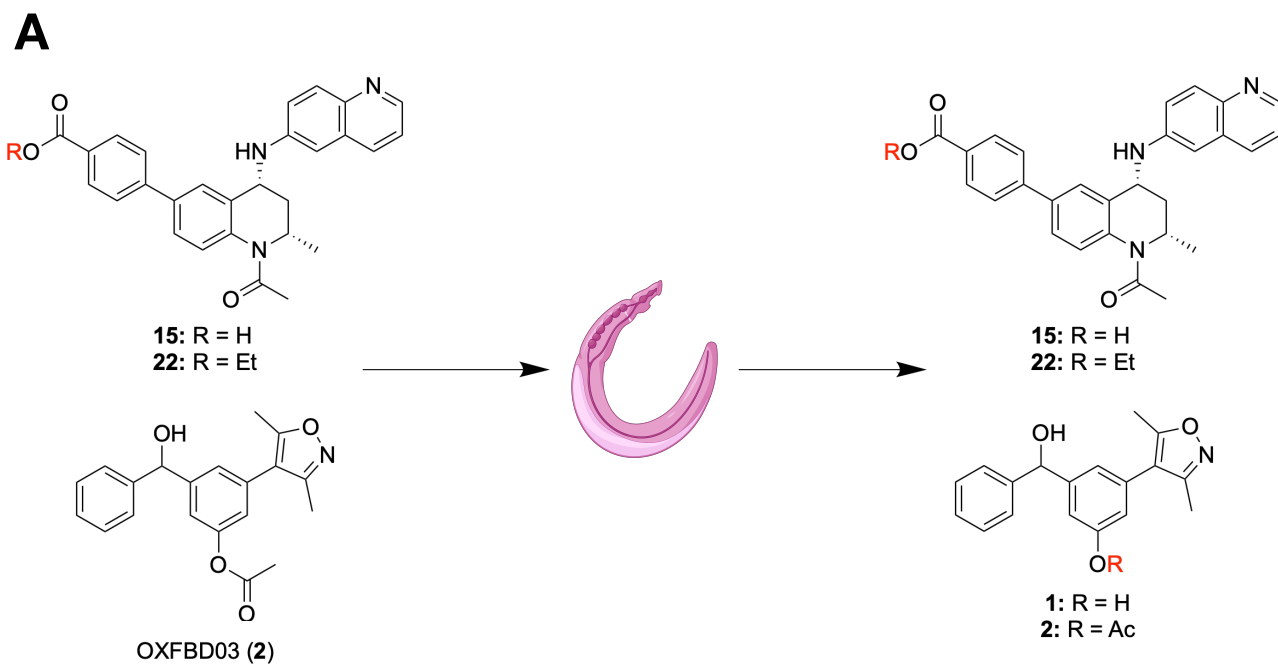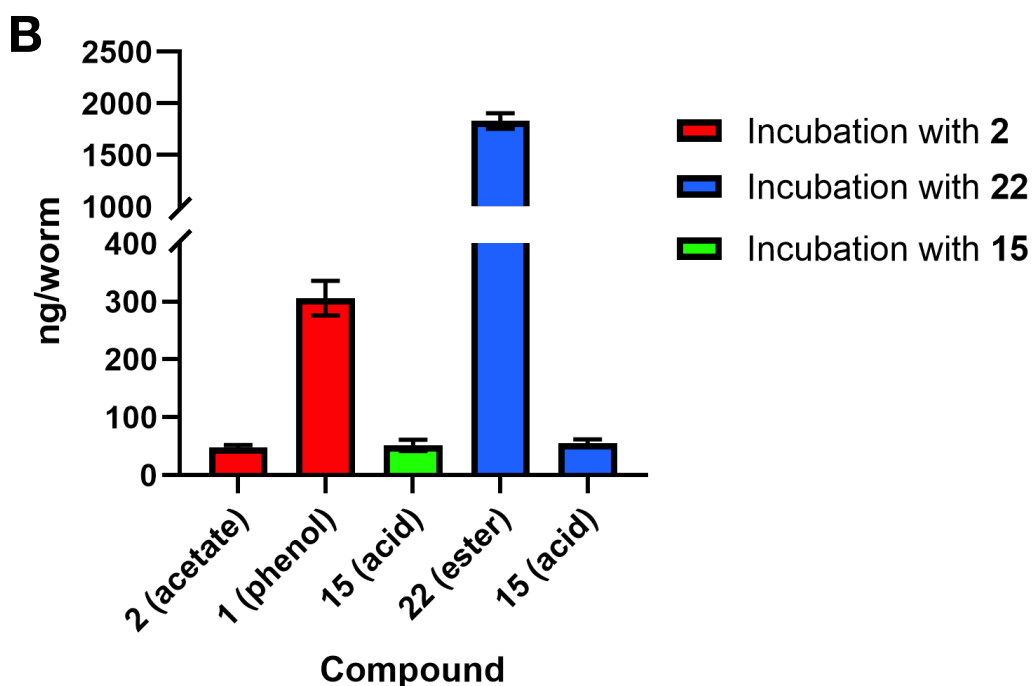

**Figure S-51A.** Schematic representation of the worm permeability experiments conducted. **B.** Estimation of the amounts of compounds **1**, **2**, **15** or **22** found in the lysate of adult male *S. mansoni* lysate following 24 h incubation with compounds **2** (red), **15** (green) and **22** (blue), using the experimental set up shown in Figure S50. The estimated amounts were calculated as a mean ( $n = 3$ ) from the analysis of lysate from male adult worms, 5 worms per well, with error bars representing the s.e.m.

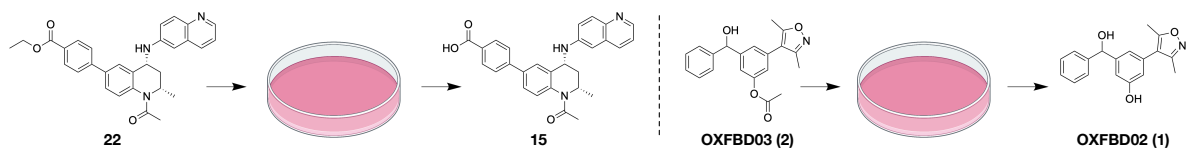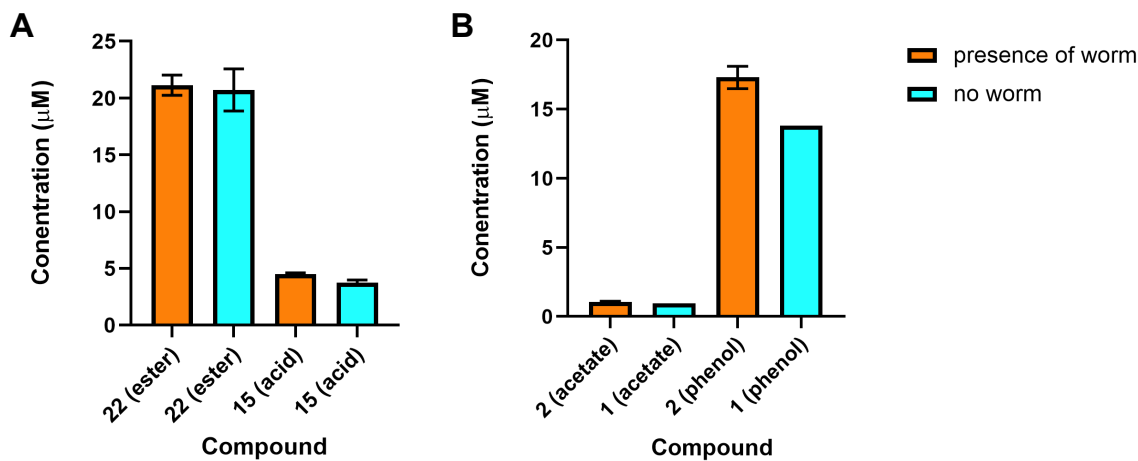

**Figure S-52. A.** Estimation of the concentration of **15** and **22** in media after incubation with **22** in the presence and absence of *S. mansoni*. The concentration estimations were calculated as an average (presence of worm n=3, no worm n=2) from the analysis media in the presence (5 worms per well) or absence of worms, with error bars representing the s.e.m. **B.** Estimation of the concentration of **1** and **2** in media after incubation with **2** in the presence and absence of *S. mansoni*. The concentration estimations were calculated as an average (presence of worm n=2, no worm n=1) from the analysis of media in the presence (5 worms per well) or absence of worms with error bars representing the s.e.m.

**Table S-4.** Aqueous solubility in phosphate buffered saline at pH 7.4 and chromLogD values for compounds **9**, **14**, **16** and **22**. Details of the solubility and chromLog D assays can be found in the General Chemistry Experimental.

| Compound  | Structure                                                                           | Aqueous Solubility by CAD ( $\mu\text{M}$ ) | chromLogD (pH 7.4) |
|-----------|-------------------------------------------------------------------------------------|---------------------------------------------|--------------------|
| <b>9</b>  | 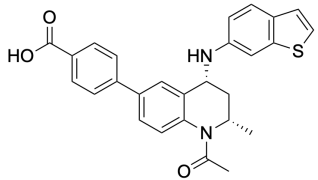   | $\geq 259$                                  | <b>2.83</b>        |
| <b>14</b> |    | $\geq 260$                                  | <b>1.78</b>        |
| <b>17</b> |   | <b>1</b>                                    | <b>7.61</b>        |
| <b>22</b> |  | <b>13</b>                                   | <b>5.95</b>        |

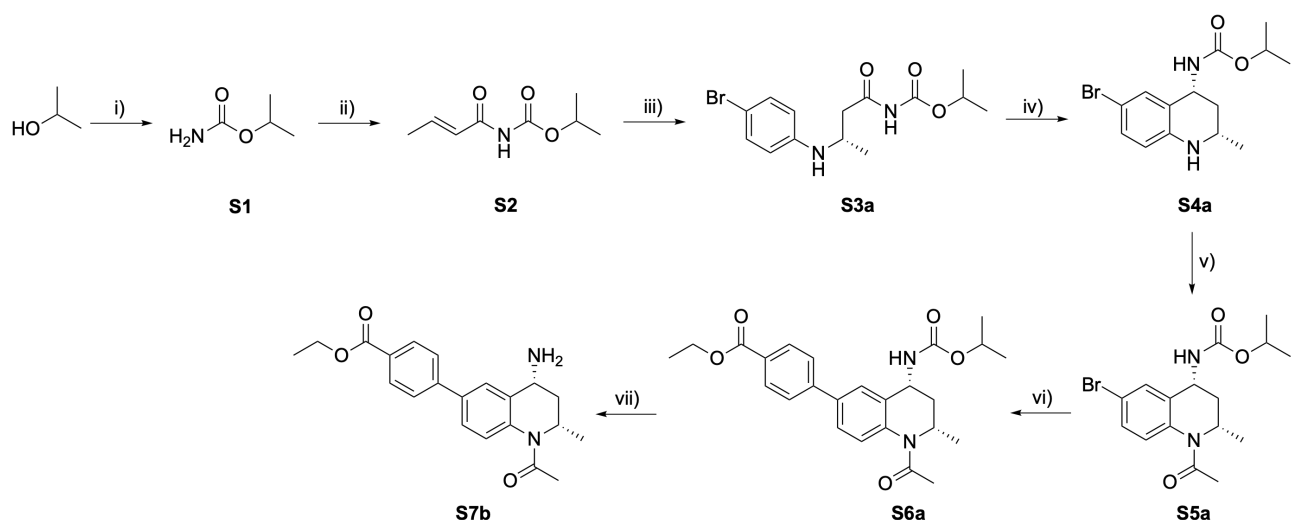

**Scheme S-1.** Synthesis of primary amine intermediate **S7a**, described by Gosmini *et al.*<sup>3</sup> and using work from Shadrick *et al.*<sup>4</sup> *Reagents and conditions:* i) TFA, *i*PrOH, NaOCN, rt, 79%; ii) Crotonoyl chloride, LiHMDS, THF,  $-78$  °C, 61%; iii) (*R*)-BINAP(OTf)<sub>2</sub>(H<sub>2</sub>O)<sub>2</sub>Pd, 4-bromoaniline, toluene, rt, 95%; iv) NaBH<sub>4</sub>, EtOH, MgCl<sub>2</sub>·6H<sub>2</sub>O, H<sub>2</sub>O,  $<0$  °C to rt, 98%; v) Pyridine, AcCl, CH<sub>2</sub>Cl<sub>2</sub>, 90%; vi) {4-[(Ethyloxy)carbonyl]-phenyl}boronic acid, Pd(Ph<sub>3</sub>)<sub>4</sub>, Na<sub>2</sub>CO<sub>3(aq)</sub>, DME, 105 °C, 91%; vii) AlCl<sub>3</sub>, CH<sub>2</sub>Cl<sub>2</sub>, 0 °C, 84%.

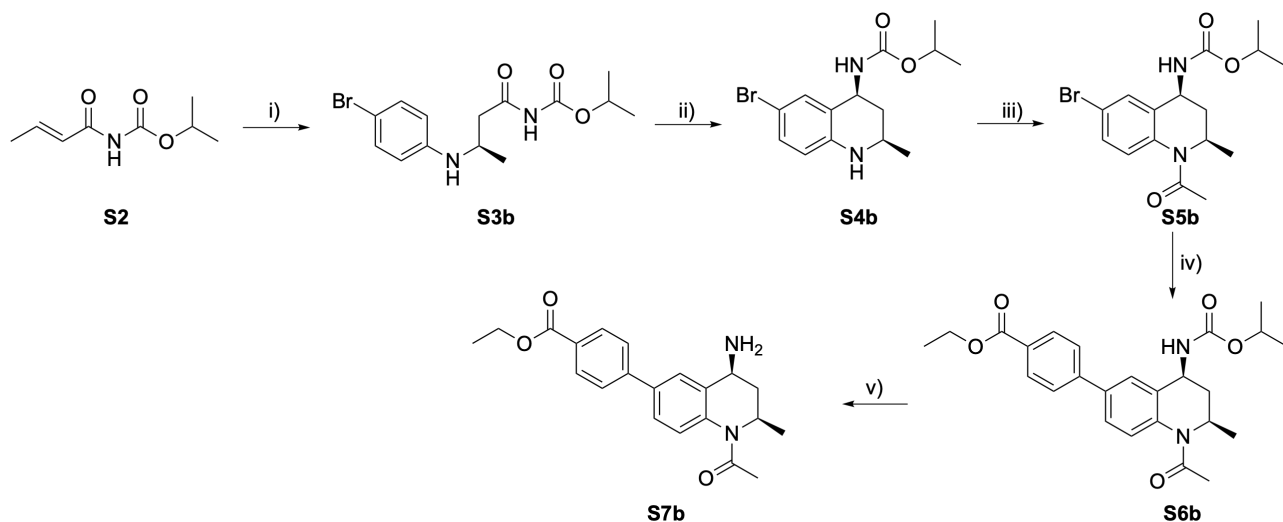

**Scheme S-2.** Synthesis of primary amine intermediate **S7b**. *Reagents and conditions:* i) (*S*)-BINAP(OTf)<sub>2</sub>(H<sub>2</sub>O)<sub>2</sub>Pd, 4-bromoaniline, toluene, rt, 90%; ii) NaBH<sub>4</sub>, EtOH, MgCl<sub>2</sub>·6H<sub>2</sub>O, H<sub>2</sub>O,  $<-10$  °C, 93%; iii) Pyridine, AcCl, CH<sub>2</sub>Cl<sub>2</sub>, 88%; iv) {4-[(Ethyloxy)carbonyl]-phenyl}boronic acid, Pd(Ph<sub>3</sub>)<sub>4</sub>, Na<sub>2</sub>CO<sub>3(aq)</sub>, DME, 105 °C, 80%; v) AlCl<sub>3</sub>, CH<sub>2</sub>Cl<sub>2</sub>, 0 °C, 82%.



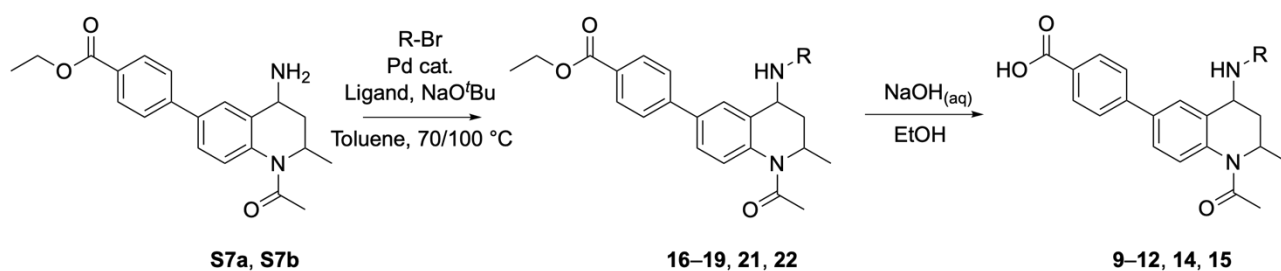

**Scheme S-3.** General synthetic scheme for compounds **9–12**, **14–19** and **21–22**; The ligand, R-Br, catalyst, ligand, temperature and yields for the synthesis of compounds **16–19**, **21** and **22** are shown in Table S5. Synthesis of **9–12**, **14** and **15**. *Reagents and conditions*: NaOH<sub>(aq)</sub>, EtOH, rt, 20–87%.

**Table S-5.** The ligand, R-Br, catalyst, ligand, temperature and yields for the syntheses of compounds **16–19**, **21** and **22**. NaO<sup>t</sup>Bu was used as the base for all reactions for the syntheses of **16–19**, **21** and **22**.

| Compound  | R-Br                  | Pd Cat.              | Ligand     | Temperature (°C) | Yield (%) |
|-----------|-----------------------|----------------------|------------|------------------|-----------|
| <b>16</b> | 6-Bromobenzothiophene | BrettPhos Pd G3      | BrettPhos  | 70               | 87        |
| <b>17</b> | 6-Bromobenzothiophene | BrettPhos Pd G3      | BrettPhos  | 70               | 69        |
| <b>18</b> | 6-Bromobenzofuran     | BrettPhos Pd G3      | BrettPhos  | 70               | 68        |
| <b>19</b> | 5-Bromobenzothiophene | BrettPhos Pd G3      | BrettPhos  | 70               | 66        |
| <b>21</b> | 6-Bromobenzothiazole  | BrettPhos Pd G3      | BrettPhos  | 70               | 48        |
| <b>22</b> | 6-Bromoquinoline      | Pd(OAc) <sub>2</sub> | CyJohnPhos | 100              | 30        |

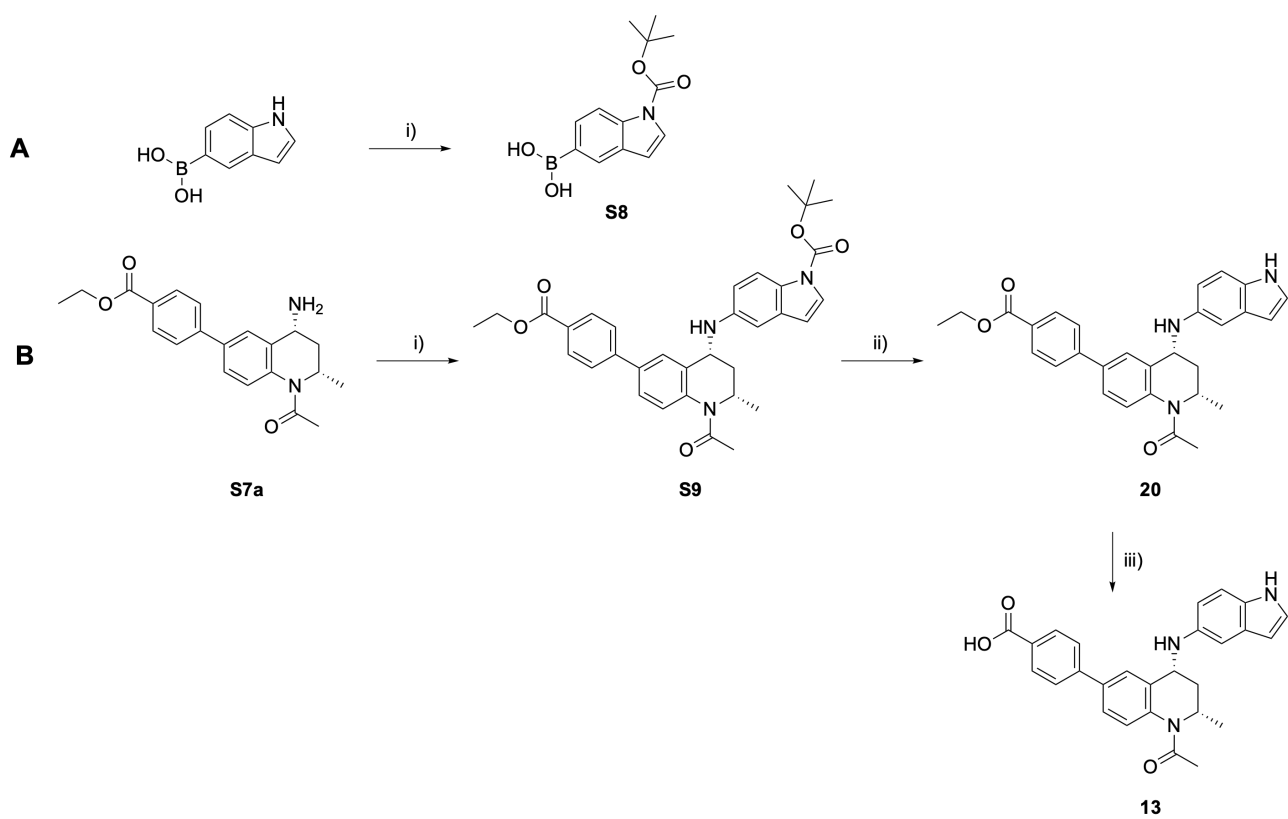

**Scheme S-4. A.** Synthesis of intermediate **S8**. *Reagents and conditions:* i)  $(\text{Boc})_2\text{O}$ , DMAP, MeCN, rt, 49%; **B.** Synthesis of compounds **20** and **13**. *Reagents and conditions:* **S8**,  $\text{Cu}(\text{OAc})_2$ ,  $\text{NEt}_3$ ,  $\text{CH}_2\text{Cl}_2$ , 3 Å molecular sieves, rt, 53%; ii) TFA,  $\text{CH}_2\text{Cl}_2$ , rt, 46%; iii)  $\text{NaOH}_{(\text{aq})}$ , EtOH, 32%.

## General biology experimental and biology methods

**Biologically tested compounds:** compounds **9-22** were synthesised by Darius McArdle using procedures outlined above. OXFBD02 (**1**), OXFBD03 (**2**), OXFBD02-F (**3**) and OXFBD04 (**4**) were synthesised by Lily-Latimer Smith, Oliver Stratton, Charles Evans, and Darius McArdle, respectively, using previously published procedures.<sup>5,6</sup> I-BET726 (**8**) was purchased from Cambridge Bioscience Ltd, BI-2536 (**7**) and I-BET151 (**6**) from MedChemExpress and (+)-JQ1 (**5**) from Stratech Scientific Ltd. The Maybridge Fragment library was obtained from Fisher Scientific. We wish to thank the EPSRC funded network, PPI-net (EP/I037210/1 and EP/I037172/1) and GSK for making the PPI-net screening collection available.

**All other biological materials** were obtained from commercial sources.

**All biological solutions** are aqueous, unless otherwise stated.

**Purified (Milli-Q) water:** obtained from a Millipore Elix<sup>®</sup> Reverse Osmosis system which was further purified by a Millipore Milli-Q<sup>®</sup>. Synthesis system with a 0.22 µm filter on the outlet. Reagent quantities given as weight per volume (*w/v*) correspond to g/mL unless otherwise stated.

**pH measurements:** performed using an VWR pH 100 pH meter or a Jenway pH meter 3305, with an Aldrich glass/calomel combination electrode or an Oakton PH 550 Benchtop pH Meter Kit, with an Oakton pH electrode with temperature sensor. Calibration was carried out between pH 4.0–7.0 or 7.0–10.0 immediately before use, with buffer solutions of phthalate (pH 4.0), phosphate (pH 7.0) and borate (pH 10.0) from Fischer Scientific, or using pH 4.0, pH 7.0, pH 10.0 buffer solutions from Cole-Palmer. Electrodes were stored in a 4 M aqueous potassium chloride solution.

**Protein concentration** was estimated by measuring the absorbance at 280 nm using a Nanodrop<sup>®</sup> ND-1000 spectrophotometer (Nanodrop<sup>®</sup> Technologies Inc.) with the 'Protein A280' program module according to the manufacturer's instructions, or NanoDrop Lite spectrophotometer (Nanodrop<sup>®</sup> Technologies Inc.), using the Beer-Lambert law and corresponding extinction coefficients.

**Protein molecular weight and molar extinction coefficient** were calculated using ProtParam on the ExPASy Bioinformatics Resource Portal.

**Centrifugation:** Protein samples of up to 10.0 mL were centrifuged in a Beckman Allegra-X30R Centrifuge (3082 ×g) at 4 °C. Cell growth media and cell lysates were centrifuged in a Beckman Coulter J-25 (11,325 ×g: JSP F500 rotor; 9605 ×g: JLA-16.250 rotor and 7741 ×g: JA-25.50 rotor, respectively).

### **Gibson Assembly (GA):**

Cloning was performed using a one-step isothermal *in vitro* recombination reaction consisting of T5 exonuclease, Phusion DNA polymerase and Taq DNA ligase. Linear vectors (~0.03 pmol) and gene inserts (~0.1 pmol) with complementary regions were incubated at 50 °C for 15-60 min in a 1:3 ratio with Gibson Assembly master mix (NEB): 20 µL reaction volume, 10 µL 2 × GA master mix. 2 µL of

the reaction mixture was used directly to transform NEB 5-alpha (#C2987) competent cells, or diluted 1:3 to transform BL21 (DE3) Gold competent cells.

**Competent cells:** *Escherichia coli* (*E. coli*) strains of the following genotypes were used:

- BL21 (DE3) Gold: F- ompT hsdSB (rB-mB-) gal dcm (DE3). DE3 denotes a chromosomal copy of the T7 RNA polymerase gene.

Competent cells were thawed on ice for 20 min before 1-5  $\mu$ L of plasmid DNA (from an 80–140 ng/ $\mu$ L stock solution) was added to 20  $\mu$ L of the competent cells in pre-chilled 1.5 mL Eppendorf tubes. The tubes were left on ice for 30 min before incubation at 42 °C for 30 sec. The tubes were returned to ice for 5 min, 500  $\mu$ L of 2-TY media was added gently to each tube, which was then incubated at 37 °C for 1 h before 100-200  $\mu$ L of the transformation mixture was plated onto agar plates containing kanamycin (50  $\mu$ g/mL) and incubated overnight.

### **Fermentation and purification conditions for bromodomain containing proteins**

For the expression and purification of the human and schistosomal bromodomain containing proteins we followed a previously published procedure.<sup>7</sup> Single colonies of transformed *E. coli* BL21(DE3) were transferred under aseptic conditions to 100 mL of 2 $\times$  TY medium containing a final concentration of 50  $\mu$ g/mL of kanamycin. The cultures were incubated overnight at 37 °C and 180 rpm. 10 mL of the overnight cultures were added to 1 L of 2 $\times$  TY medium containing a final concentration of 50  $\mu$ g/mL of kanamycin. The cultures were incubated overnight at 37 °C and 180 rpm. When the OD<sub>600</sub> reached a value of 0.6, the cultures were cooled down to 16 °C and IPTG was added to the culture at a final concentration of 0.1 mM. OD<sub>600</sub> values were measured in 1.6 mL cuvettes against a reference of 2 $\times$  TY medium, using a Novaspec<sup>®</sup> II spectrometer measuring at 600 nm. Subsequently, the cells were fermented at 16 °C, 180 rpm, overnight. Cells were harvested by centrifugation (8000 rpm, 4 °C, 10 min). The cell pellet was re-suspended in Extraction buffer (100 mL per 20 g cell mass), 25 Units (U) of Benzoase was added, then the cells were lysed by sonication using thirty 5 sec bursts interrupted by 5 to 10 sec pauses. Polyethyleneimine (PEI, 0.15% v/v) was added, and the cells were incubated on ice for 15 min. The lysate was clarified using centrifugation and the supernatant decanted, filtered through a 0.45  $\mu$ m filter, and applied to a purification column. Immobilised metal affinity chromatography (IMAC) was performed with a HisTrap<sup>™</sup> (5 mL) column (GE Healthcare) charged with 4 CV of 100 mM NiSO<sub>4</sub> and washed with 10 CV of binding buffer prior to loading the cell lysate at 1 mL/min. The column was then washed with approximately 20 CV binding buffer. When all residual products of bacterial fermentation were eluted from the column by binding buffer, the protein of interest was batch-eluted with elution buffer (step gradient elution, 5 – 500 mM imidazole). Eluted protein was collected and fractionated; fractions containing the highest levels of pure protein (as determined by SDS-PAGE gels and UV trace) were concentrated using 5k or 10k concentrators (GE Healthcare) in a Beckman Allegra<sup>™</sup> 21R centrifuge. Further purification was achieved by gel filtration chromatography. Concentrated fractions (<2 mL)

were loaded on a 120/300 mL Superdex 75 size exclusion chromatography column (Amersham). Eluted protein was collected and fractionated; fractions containing the highest levels of pure protein (as determined by SDS-PAGE gels) were concentrated as described before.

**Table S-6.** Components of 2× TY media

| Buffer | Reagent       | Mass per litre (g <sup>L</sup> <sup>-1</sup> ) |
|--------|---------------|------------------------------------------------|
| 2× TY  | Trypton       | 16.0                                           |
|        | Yeast Extract | 10.0                                           |
|        | NaCl          | 5.0                                            |

**Table S-7.** Buffer type and composition for purification of H6-*SmBRD3*(1,2) and H6-*SmBRD3*(2).

| Buffer                              | Reagent                | Concentration     |
|-------------------------------------|------------------------|-------------------|
| Binding buffer<br>(pH = 7.6)        | HEPES                  | 50 mM             |
|                                     | NaCl                   | 500 mM            |
|                                     | Imidazole              | 5 mM              |
| Extraction buffer<br>(pH = 7.6)     | HEPES                  | 50 mM             |
|                                     | NaCl                   | 500 mM            |
|                                     | Imidazole              | 5 mM              |
|                                     | SigmaFAST <sup>a</sup> | 1 Tbl/20 g pellet |
| Elution buffer<br>(pH = 7.6)        | HEPES                  | 50 mM             |
|                                     | NaCl                   | 500 mM            |
|                                     | Imidazole              | 500 mM            |
| Strip buffer<br>(pH = 7.6)          | HEPES                  | 50 mM             |
|                                     | NaCl                   | 500 mM            |
|                                     | EDTA                   | 100 mM            |
| Gel filtration buffer<br>(pH = 7.6) | HEPES                  | 50 mM             |
|                                     | NaCl                   | 500 mM            |

<sup>a</sup>SigmaFAST Protease Inhibitor Cocktail Tablet, EDTA Free (Sigma-Aldrich)

### Fermentation and purification conditions for TEV protease pRK793

The plasmid for pRK793 was kindly provided by the group of Prof. Christopher Schofield, University of Oxford, as a glycerol stock of transfected *E. coli* BL21 (DE3) cells. Single colonies of transformed *E. coli* BL21(DE3) were transferred under aseptic conditions to 100 mL of 2× TY medium containing a final concentration of 50 µg/mL of kanamycin. The cultures were incubated overnight at 37 °C and 180 rpm. 10 mL of the overnight cultures were added to 1 L of 2× TY medium containing a final concentration of 50 µg/mL of Kanamycin. The cultures were incubated overnight at 37 °C and 180 rpm. When OD<sub>600</sub> reached a value of 0.7, the cultures were cooled to 18 °C, and IPTG was added to the culture at a final concentration of 0.5 mM. Subsequently the cells were fermented at 18 °C, 180 rpm, overnight. Cells were harvested by centrifugation (8000 rpm, 4 °C, 10 min). The cell pellet was lysed by sonication according to our standard lab protocols and the lysate was loaded on a pre-equilibrated 5 mL Ni<sup>2+</sup>-NTA column. The protein was eluted during a gradient elution from 5 mM to 500 mM of imidazole. Protein containing fractions were combined and concentrated using a Pierce™ Protein Concentrator PES (10k MWCO, 5-20 mL). 2 mL of the concentrated sample was injected in a S200 130 mL gel filtration column. Purity of the fractions was monitored using SDS-PAGE and pure fractions were combined and concentrated using a Pierce™ Protein Concentrator PES (10 K MWCO, 5-20 mL) to a concentration of approximately 15 mg/mL. Glycerol was added to a final concentration of 15% prior to snap freezing the samples using liquid nitrogen.

**Table S-8.** Buffer type and composition for purification of TEV protease pRK793.

| Buffer                              | Reagent   | Concentration |
|-------------------------------------|-----------|---------------|
| Binding buffer<br>(pH = 7.6)        | HEPES     | 25 mM         |
|                                     | NaCl      | 500 mM        |
|                                     | Glycerol  | 5% (v/v)      |
|                                     | Imidazole | 5 mM          |
|                                     | TCEP      | 0.5 mM        |
| Gel filtration buffer<br>(pH = 7.6) | HEPES     | 25 mM         |
|                                     | NaCl      | 500 mM        |
|                                     | Glycerol  | 5% (v/v)      |
|                                     | TCEP      | 0.5 mM        |
| Elution buffer<br>(pH = 7.6)        | HEPES     | 25 mM         |
|                                     | NaCl      | 500 mM        |
|                                     | Glycerol  | 5% (v/v)      |
|                                     | Imidazole | 500 mM        |
|                                     | TCEP      | 0.5 mM        |

### **Purification conditions for *SmBRD3* bromodomain for crystallisation trials**

Fermentation and cell lysis was performed as described above for the other bromodomain containing proteins. Immobilised metal affinity chromatography (IMAC) was performed with a HisTrap™ (5 mL) column (GE Healthcare) charged with 4 CV of 100 mM NiSO<sub>4</sub> and washed with 10 CV of binding buffer prior to loading the cell lysate at 1 mL/min. The column was then washed with approximately 20 CV binding buffer. When all residual products of bacterial fermentation were eluted from the column by binding buffer, the protein of interest was batch-eluted with elution buffer (step gradient elution, 5 – 500 mM imidazole). Eluted protein was collected and fractionated; fractions containing the highest levels of pure protein (as determined using SDS-PAGE gels and UV traces) were concentrated using 5k spin-concentrators (GE Healthcare) in a Beckman Allegra™ 21R centrifuge to approximately 5 mL. 15 mL of TEV cleavage buffer (50 mM HEPES, 500 mM NaCl, 1 mM β-mercaptoethanol, pH 7.6) were added and the mixture was again concentrated to approximately 5 mL using 5k concentrators (GE Healthcare) in a Beckman Allegra™ 21R centrifuge. After determination of the concentration of H6-SmBRD3(2), TEV protease (pRK793) was added in a molar ratio of 2:1 (H6-SmBRD3(2)/TEV protease). TEV cleavage buffer was added to give a total volume 20 mL. The mixture was incubated overnight at 4 °C. After sufficient digestion of the substrate protein (monitored using SDS-PAGE), the mixture was concentrated to approximately 2 mL using 5k concentrators (GE Healthcare) in a Beckman Allegra™ 21R centrifuge. To separate cleaved substrate protein (*SmBRD3*(2)) from the H6-tag that has been cleaved off and the H6-tagged TEV protease, a second immobilised metal affinity chromatography (IMAC) was performed with a HisTrap™ (5 mL) column (GE Healthcare) charged with 4 CV of 100 mM NiSO<sub>4</sub> and washed with 10 CV of binding buffer prior to loading the cell lysate at 1 mL/min. The column was then washed with approximately 20 CV binding buffer. *SmBRD3*(2) was detected in the flow-through and H6-tagged components were subsequently eluted with elution buffer (step gradient elution, 5 – 500 mM imidazole). Eluted protein was collected and fractionated; fractions containing the highest levels of pure protein (as determined by SDS-PAGE gels and UV trace) were concentrated using 5k concentrators (GE Healthcare) in a Beckman Allegra™ 21R centrifuge to approximately 2 mL. Further purification was achieved using gel filtration chromatography. Concentrated fractions (<2 mL) were loaded on a 120/300 mL Superdex 75 size exclusion chromatography column (Amersham). Please note, for this gel filtration we used a modified gel filtration buffer with a reduced amount of NaCl (see table below). Eluted protein was collected and fractionated; fractions containing the highest levels of pure protein (as determined by SDS-PAGE gels) were concentrated to a final concentration of 12.31 mg/mL and 24.89 mg/mL, respectively.

**Table S-9.** Buffer type and composition for purification of *SmBRD3(2)*.

| Buffer                              | Reagent                | Concentration     |
|-------------------------------------|------------------------|-------------------|
| Binding buffer<br>(pH = 7.6)        | HEPES                  | 50 mM             |
|                                     | NaCl                   | 500 mM            |
|                                     | Imidazole              | 5 mM              |
| Extraction buffer<br>(pH = 7.6)     | HEPES                  | 50 mM             |
|                                     | NaCl                   | 500 mM            |
|                                     | Imidazole              | 5 mM              |
|                                     | SigmaFAST <sup>a</sup> | 1 Tbl/20 g pellet |
| Elution buffer<br>(pH = 7.6)        | HEPES                  | 50 mM             |
|                                     | NaCl                   | 500 mM            |
|                                     | Imidazole              | 500 mM            |
| Strip buffer<br>(pH = 7.6)          | HEPES                  | 50 mM             |
|                                     | NaCl                   | 500 mM            |
|                                     | EDTA                   | 100 mM            |
| Gel filtration buffer<br>(pH = 7.6) | HEPES                  | 50 mM             |
|                                     | NaCl                   | 150 mM            |

<sup>a</sup>SigmaFAST Protease Inhibitor Cocktail Tablet, EDTA Free

### Sodium dodecyl sulfate polyacrylamide gel electrophoresis (SDS-PAGE)

Samples obtained from milli-scale expression were analysed by SDS-PAGE. Gels were prepared using 70 mm × 100 mm glass plates, with 0.75 mm spacers. Tetramethylethylenediamine (TEMED) and freshly prepared ammonium persulfate were added just prior to pouring the gels. The resolving gel was cast with the addition of a separate layer of isopropyl alcohol (to ensure a level surface). Once the resolving layer had polymerised, isopropyl alcohol was removed, and the stacking gel was cast. For protein denaturation samples were prepared by mixing with sample loading buffer (4×) and incubation at 100 °C for 10 min. All gels were loaded with one of the following molecular weight ladders: blue protein standard, broad range (NEB); colour protein standard, broad range (NEB). Gels were run on a mini-PROTEAN Tetra Electrophoresis System (Bio-Rad) at a constant potential of 100 V. Following electrophoresis, gels were stained for 30 min with InstantBlue™ Coomassie® stain (Expedeon) and afterwards destained for 5 h.



**Table S-10.** Gel compositions (quantities for 1 gel) for SDS-PAGE.

| Reagent                  | Resolving gel (16%) | Stacking gel (4%) |
|--------------------------|---------------------|-------------------|
| Tris-HCl (1.5 M, pH 8.8) | 1.25 mL             | -                 |
| Tris-HCl (0.5 M, pH 6.8) | -                   | 0.65 mL           |
| Milli-Q water            | 1.05 mL             | 1.45 mL           |
| 30 % (w/v) Acrylamide    | 2.65 mL             | 0.35 mL           |
| SDS (10% w/v)            | 50 $\mu$ L          | 25 $\mu$ L        |
| 10% (w/v) APS            | 50 $\mu$ L          | 25 $\mu$ L        |
| TEMED                    | 4 $\mu$ L           | 2.5 $\mu$ L       |

**Table S-11.** Buffer composition for SDS-PAGE.

| Buffer                  | Reagent                               | Amount required per litre |
|-------------------------|---------------------------------------|---------------------------|
| SDS-PAGE running buffer | Tris-HCl                              | 30 g                      |
|                         | Glycine                               | 144 g                     |
|                         | SDS                                   | 10 g                      |
| SDS-PAGE stain          | Coomassie <sup>®</sup> brilliant blue | 2.5 mL                    |
|                         | acetic acid                           | 100 mL                    |
|                         | methanol                              | 300 mL                    |
| SDS-PAGE destain        | acetic acid                           | 100 mL                    |
|                         | methanol                              | 400 mL                    |

### **Differential scanning fluorimetry assay**

The differential scanning fluorimetry (DSF) or thermal stability assays were carried out following the protocol described by Niesen *et al.* and data were analysed as described previously.<sup>8</sup> Thermal melting experiments were carried out using the Mx3005p real-time PCR machine (Agilent) and employing a protein concentration of 5  $\mu\text{M}$  for the schistosomal bromodomains [*SmBRD3(2)*, *SmBRD3(1,2)*]. If not otherwise stated, inhibitors were adjusted to a concentration of 150  $\mu\text{M}$  and the DMSO content was 0.5% (*v/v*). Buffer conditions were 50 mM HEPES buffer, pH 7.5, 500 mM NaCl and a 1:500 dilution of SYPRO<sup>®</sup> Orange (Invitrogen, CA) was used. The 96-well PCR plates were sealed and centrifuged for 2 min at 1000 rpm at 25 °C before measurement. The temperature was raised with a step of 1 °C per 30 s from 25 °C to 85 °C, and fluorescence readings were taken at each interval. Excitation and emission filters for the SYPRO<sup>®</sup> Orange dye were set to 465 and 590 nm, respectively. The observed temperature shifts,  $\Delta T_m$ , for each inhibitor was recorded as the difference between the transition midpoints of sample and reference wells containing protein without inhibitor in the same plate. Reported  $\Delta T_m$  values are the mean of two replicates.

### **Isothermal Titration Calorimetry**

Isothermal titration calorimetry experiments were performed on a MicroCal PEAQ-ITC Automated or Manual (Malvern) and analysed with the MicroCal PEAQ-ITC Analysis software (Malvern 1.1.0.1262) using a single binding site model. For each experiment, the first data point was removed from the analysis. The proteins were dialysed at 4 °C overnight in a Slide-A-LyzerR MINI Dialysis Device (2000 MWCO; Thermo Scientific Life Technologies) into 50 mM HEPES, 150 mM NaCl containing 0.2% DMSO; pH 7.4. Proteins were centrifuged to remove aggregates (3 min, 3000 rpm, 25 °C). Compounds were dissolved as a DMSO stock solution and diluted to the required concentration using dialysis buffer (DMSO free) and to a final DMSO concentration of 0.2% (unless otherwise specified). The cell was stirred at 750 rpm, reference power set to 5  $\mu\text{cal/s}$  and temperature held at 25 °C. After an initial delay of 60 s, 19 x 2  $\mu\text{L}$  injections (first injection 0.4  $\mu\text{L}$ ) were performed with a spacing of 180 s. Small molecule solutions in the calorimetric cell (250  $\mu\text{L}$  for manual, 400  $\mu\text{L}$  for auto, 10 to 30  $\mu\text{M}$ ) were titrated with the protein solutions in the syringe (40  $\mu\text{L}$  for manual, 120  $\mu\text{L}$  for auto, 100 to 300  $\mu\text{M}$ ).

### **Determination of compound parasite permeability**

Male adult schistosomes were seeded into 24-well tissue culture plates (5 worms/well), dosed with compounds (20  $\mu\text{M}$  in 0.2% DMSO *v/v*) and incubated for 24 h at 37 °C in 5%  $\text{CO}_2$ . Following the incubation period, parasites were washed three times by sequentially transferring the worms to 2 mL of fresh media lacking any compound treatment. Worms were blotted dry to remove excess media between transfers. Parasites were then snap frozen and stored at -80 °C. When ready for processing, worms were removed from the -80 °C and subject to 3 rounds of repeated snap freeze:thawing. After the final thaw step a sterile 3 mm stainless steel bead was added to each tube

along with 200  $\mu$ L HPLC grade MeOH and samples were homogenised with a TissueLyser (Qiagen) (3  $\times$  3 min, 50 Hz). Finally, samples were centrifuged at 14,000 rpm for 30 min at 4  $^{\circ}$ C and the supernatant removed to a fresh tube for analysis. For the LCMS analysis of media samples, 1 mL of media was removed and lyophilised. The residue was then resuspended in 200  $\mu$ L of HPLC grade MeOH and centrifuged at 14,000 rpm for 30 min at 4  $^{\circ}$ C. The supernatant was removed to a fresh tube for analysis.

Samples were analysed using a Q-Exactive Plus (Thermo Scientific) with an HESI II source coupled to a Dionex Ultimate 3000 Ultra High Performance Liquid Chromatography (UHPLC) system (Thermo Scientific). Chromatographic separation was performed on a Hypersil Gold 1.9  $\mu$ m, 2.1  $\times$  200 mm column (Thermo Scientific) using water 0.1 % formic acid (mobile phase A) and methanol 0.1% formic acid (mobile phase B) at a flow rate of 0.6 mL/min and column oven temperature at 60  $^{\circ}$ C. Each sample (5  $\mu$ L) was analysed following a gradient of 0% B to 100 % B in 9 min. The flow was held at 100% B for 2.5 min and the column re-equilibrated for 1.5 min. Data were acquired in positive ESI mode. Each experiment consisted of a full scan (65-975 mass-to-charge ratio ( $m/z$ ) at 140k resolution (AGC target  $2 \times 10^5$  at 100 ms maximum injection time, IT) and MS<sup>2</sup> scans (*PRM multiplexed*, 4 stepped, HCD normalised collision energies (nce) of 50 % and 17.5k Orbitrap mass resolution) using selected targeted mass properties for either positive or negative ionisation mode, with an AGC target of  $2 \times 10^5$  and isochronous IT enabled over 13 min runtime (**Table S12**). The spray voltage was 3.5 kV for positive and 2.5 kV for negative ionisation modes. The temperatures of the ion transfer capillary and vaporiser were 350  $^{\circ}$ C and 360  $^{\circ}$ C respectively with sheath and auxiliary gas set at 30 and 15 arbitrary units, respectively. The data were acquired using Thermo Scientific Xcalibur version 4.2.47. Mass calibration was performed regularly according to the manufacturer's recommendations. Targets were quantified using quadratic models to 1) avoid pre-concentration and 2) account for low concentrated targets within a sample outside the inherent linear range. Data were extracted as absolute area of the quantified ion using Xcalibur peak integration for the target masses of the following transitions: **2.6**: Q1 452.1969 - Q3 145.05; OXFBD02 (**1.4**): Q1 296.1282 - Q3 148.08; **2.31**: Q1 480.2282 - Q3 145.05; OXFBD03 (**1.37**): Q1 338.1387 - Q3 235.10. Concentrations and peak area of compound standard solutions for a calibration curve were log<sub>10</sub>-transformed and plotted as a two-point calibration curve. This was used to estimate compound concentration from samples.

**Table S-12:** Inclusion list for parallel reaction monitoring (PRM) on Q-Exactive Plus.

| Mass<br>[m/z] | Formula<br>[M]                                                | Specie<br>[z] | CS | Polarity | Start<br>[min] | End<br>[min] | (N)C | MS<br>ID | Number    |
|---------------|---------------------------------------------------------------|---------------|----|----------|----------------|--------------|------|----------|-----------|
| 452.19687     | C <sub>28</sub> H <sub>25</sub> N <sub>3</sub> O <sub>3</sub> | +H            | 1  | Positive | 0.1            | 13.0         | 50   | 1        | <b>15</b> |
| 480.22817     | C <sub>30</sub> H <sub>29</sub> N <sub>3</sub> O <sub>3</sub> | +H            | 1  | Positive | 0.1            | 13.0         | 50   | 2        | <b>22</b> |
| 296.12812     | C <sub>18</sub> H <sub>17</sub> NO <sub>3</sub>               | +H            | 1  | Positive | 0.1            | 13.0         | 50   | 3        | <b>1</b>  |
| 338.13868     | C <sub>20</sub> H <sub>19</sub> NO <sub>4</sub>               | +H            | 1  | Positive | 0.1            | 13.0         | 50   | 4        | <b>2</b>  |

CS = charge state; (N)CE = normalised collision energy

### Crystallisation of *SmBRD3(2)*

Initially, *SmBRD3(2)* (241..368aa, 6xHis-tag cleaved) was co-crystallised with I-BET726 (**8**) by the sitting drop vapor diffusion method using high throughput (HT) crystallisation screening methods. All HT screens were performed in CrystalMation Intelli-Plate 96-3 low-profile plates (Hampton Research, HR3-119). Reservoirs and drops were dispensed using an Art Robbins Phoenix automatic liquid handler. Reservoirs contained 80  $\mu$ L of sparse matrix precipitant solution and crystallisation drops (200 – 300 nL total volume) were placed in each of the three subwells; subwell 1, 200 nL protein : 100 nL well solution; subwell 2, 100 nL protein : 100 nL well solution ; subwell 3, 100 nL protein : 200 nL well solution. Plates were sealed using optically clear Xtra-Clear Advanced Polyolefin StarSeal (StarLab) seals and incubated at 19 °C. Three commercially available precipitant kits (JCSG-plus MD1-37 (Molecular Dynamics), Crystal Screen (HR2-110, 1-50, Hampton), and Crystal Screen 2 (HR2-112, 1-46, Hampton)) were screened for suitable crystallization conditions.

Crystals of the *SmBRD3(2)*:I-BET726 complex were grown by co-crystallisation in conditions containing 25% w/v PEG 3350, 0.1 M Bis-TRIS, pH 5.5 (sitting drop, protein to-well ratio 1:2) at a protein concentration of 12.31 mg/mL and a final I-BET726 (**8**) concentration of 2 mM added directly to the protein prior to crystallization from a 100 mM stock solution in DMSO. Crystals formed within 5 weeks (maximum crystal size 300  $\times$  150  $\times$  150  $\mu$ m).

For *SmBRD3(2)*:**9** co-crystallisation, an optimisation screen based on the initial *SmBRD3(2)*:I-BET726 (**8**) complex crystallisation conditions were carried out using component ranges of 19% to 30% PEG 3350 and pH 5.5 to 6.9 0.1M Bis-TRIS.

The resultant crystals were cryoprotected by soaking crystals in reservoir solution diluted with 25% (v/v) glycerol before being flash cooled in liquid nitrogen.

### Data collection and processing

Data were collected using single crystals at Diamond Light Source beamlines i24 (*SmBRD3(2):I-BET726 (8)*) or i04-1 (*SmBRD3(2):9*) equipped with Dectris Eiger R 4M or Pilatus 6M-F detectors, respectively. Diffraction data for *SmBRD3(2):I-BET726 (8)* were processed using HKL2000<sup>9</sup> and data for *SmBRD3(2):9* were autoprocessed by the beamlines autoprocessing pipeline using the DIALS strategy.<sup>10</sup> <sup>2</sup>Both crystals processed in Space Group  $C222_1$  with similar unit cell constants (Table S13).

### Structure solution and refinement

*SmBRD3(2)* structures were solved by molecular replacement (MR) using PHASER<sup>11</sup> with a structure of mouse BRD4 as the search model (PDB ID 3JVL). Two molecules were identified in the asymmetric unit. Visual inspection of initial electron density maps indicated that each chain contained bound inhibitor. Inhibitor was fit to the density and iterative cycles of model fitting in COOT<sup>12</sup> and refinement using PHENIX<sup>13</sup> were carried out until the converging  $R_{\text{work}}$  and  $R_{\text{free}}$  no longer decreased. Data collection and refinement statistics for all structures can be found in Table S13.

**Table S-13.** Protein crystallography data collection and refinement statistics.

⌘ Values in brackets indicate the outermost shell.

$$R_{\text{merge}} = \frac{\sum_j \sum_h |I_{hj} - \langle I_h \rangle|}{\sum_j \sum_h \langle I_h \rangle} \times 100.$$

$$R_{\text{work}} = \frac{\sum ||F_{\text{obs}}| - |F_{\text{calc}}||}{\sum |F_{\text{obs}}|} \times 100.$$

$R_{\text{free}}$ , based on 7.45% (*SmBRD3(2)*-I-BET726 (**8**)), 4.59% (*SmBRD3(2)*-**9**) of the total reflections.

| Structure                                                                                                       | <i>SmBRD3(2)</i> :I-BET726 ( <b>8</b> ) | <i>SmBRD3(2)</i> : <b>9</b>           |
|-----------------------------------------------------------------------------------------------------------------|-----------------------------------------|---------------------------------------|
| PDB ID                                                                                                          | 7AMC                                    | 7AMH                                  |
| <b>Data Collection</b>                                                                                          |                                         |                                       |
| Radiation source                                                                                                | Synchrotron<br>Diamond Beamline I24     | Synchrotron<br>Diamond Beamline I04-1 |
| Detector                                                                                                        | EIGER R 4M                              | Dectris Pilatus 6M-F                  |
| X-ray Wavelength (Å)                                                                                            | 0.9786                                  | 0.9119                                |
| Resolution Range (Å)*                                                                                           | 43.99-1.22 (1.25-1.22)                  | 63.37-1.86 (1.90-1.86)*               |
| Space Group                                                                                                     | C 2 2 2 <sub>1</sub>                    | C 2 2 2 <sub>1</sub>                  |
| Unit Cell Dimensions<br>( <i>a</i> Å, <i>b</i> Å, <i>c</i> Å, $\alpha^\circ$ , $\beta^\circ$ , $\gamma^\circ$ ) | 51.81 83.24 126.60 90.0 90.0 90.0       | 52.20 84.11 126.74 90.0 90.0 90.0     |
| Total Number of Reflections Observed                                                                            | 1014641 (63122)*                        | 276609 (10702)*                       |
| Number of Unique Reflections                                                                                    | 81598 (5962)*                           | 23711 (1146)*                         |
| Multiplicity <sup>⌘</sup>                                                                                       | 12.4 (10.6)*                            | 11.7 (9.3)*                           |
| Completeness (%) <sup>⌘</sup>                                                                                   | 99.9 (99.9)*                            | 99.9 (98.9)*                          |
| $I/\sigma(I)$                                                                                                   | 6.2 (1.1)*                              | 6.8 (0.5)*                            |
| $R_{\text{merge}}$ (%)                                                                                          | 0.187 (1.950)*                          | 0.227 (4.369)*                        |
| CC1/2 <sup>⌘</sup>                                                                                              | 0.986 (0.614)*                          | 0.995 (0.470)*                        |
| <b>Refinement</b>                                                                                               |                                         |                                       |
| $R_{\text{work}}$ (%)                                                                                           | 0.1604                                  | 0.2174                                |
| $R_{\text{free}}$ (%)                                                                                           | 0.1772                                  | 0.2538                                |
| RMS Deviation<br>(Bonds/Angle)                                                                                  | 0.009/1.032                             | 0.012/0.889                           |
| Average <i>B</i> Factor (Å <sup>2</sup> )                                                                       | 25.81                                   | 37.23                                 |
| Wilson <i>B</i> Factor (Å <sup>2</sup> )                                                                        | 15.7                                    | 28.1                                  |
| Number of Water Molecules                                                                                       | 337                                     | 210                                   |

Structures have been deposited in the RSCB as PDB ID 7AMC and 7AMH. We thank the staff at Diamond Light Source beamline i24 visit mx18069-64 and i04-1 visit mx23459-11 for providing beamtime.

## NMR spectra of novel compounds

### <sup>1</sup>H NMR ethyl 4-((2*S*,4*R*)-1-acetyl-4-[(1-benzothiophen-6-yl)amino]-2-methyl-1,2,3,4-tetrahydroquinolin-6-yl)benzoate (**16**)

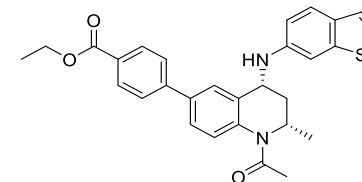

Current Data Parameters  
NAME Proton  
EXPNO 1  
PROCNO 1

F2 - Acquisition Parameters  
Date\_ 20220222  
Time\_ 11.58 h  
INSTRUM avh400  
PROBHD Z108618\_0873 ( )  
PULPROG zg60  
TD 65536  
SOLVENT CD3CN  
NS 16  
DS 2  
SWH 8012.820 Hz  
FIDRES 0.244532 Hz  
AQ 4.0894465 sec  
RG 88.17  
DW 62.400 usec  
DE 6.50 usec  
TE 297.2 K  
D1 1.00000000 sec  
TD0 1  
SFO1 400.1324008 MHz  
NUC1 1H  
P1 14.00 usec  
PLW1 14.36999989 W

F2 - Processing parameters  
SI 32768  
SF 400.1300000 MHz  
WDW EM  
SSB 0  
LB 0.30 Hz  
GB 0  
PC 1.00

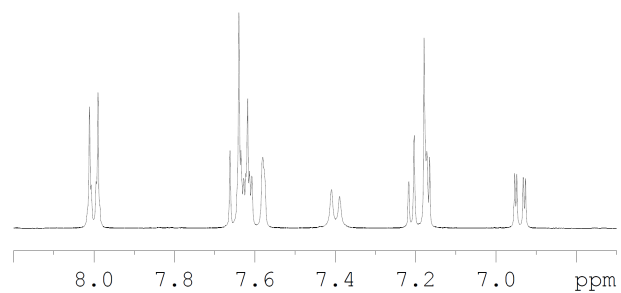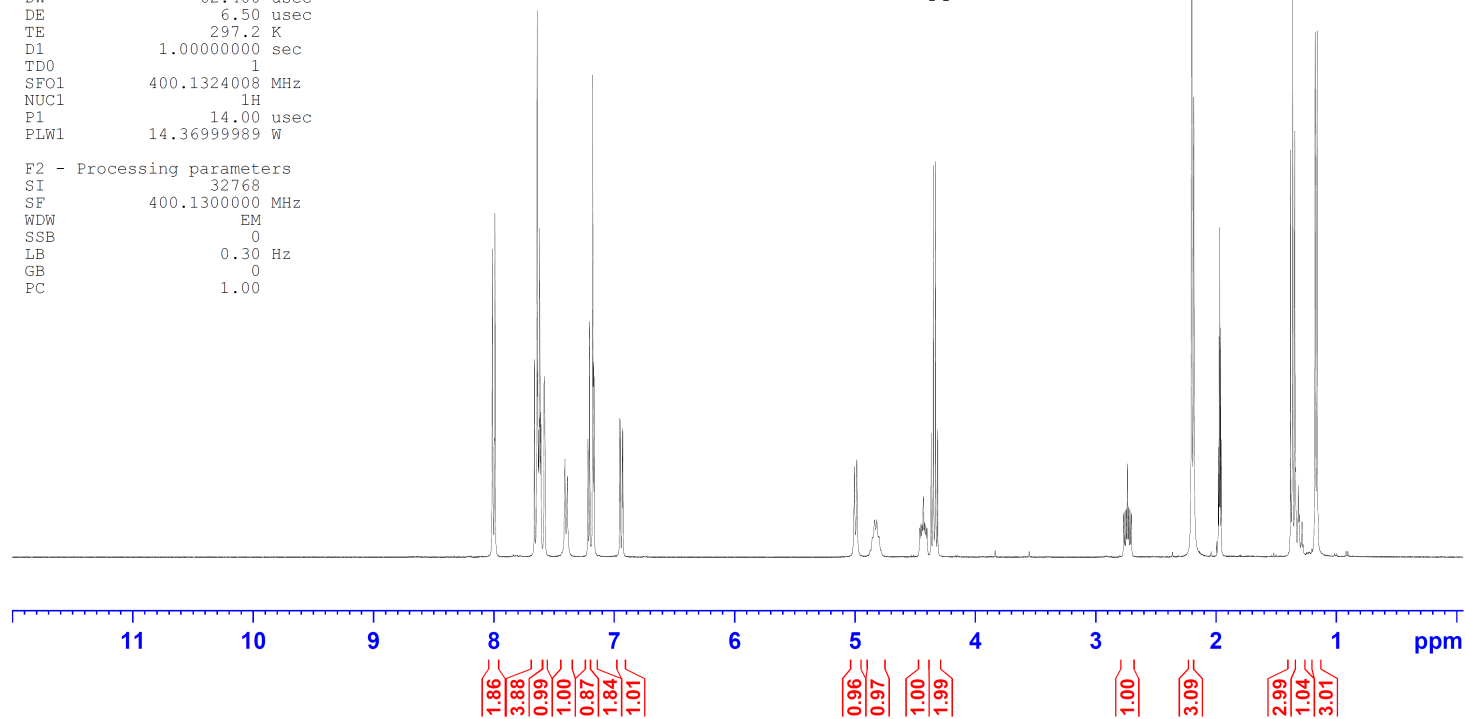

<sup>13</sup>C NMR ethyl 4-{(2*S*,4*R*)-1-acetyl-4-[(1-benzothiophen-6-yl)amino]-2-methyl-1,2,3,4-tetrahydroquinolin-6-yl}benzoate (**16**)

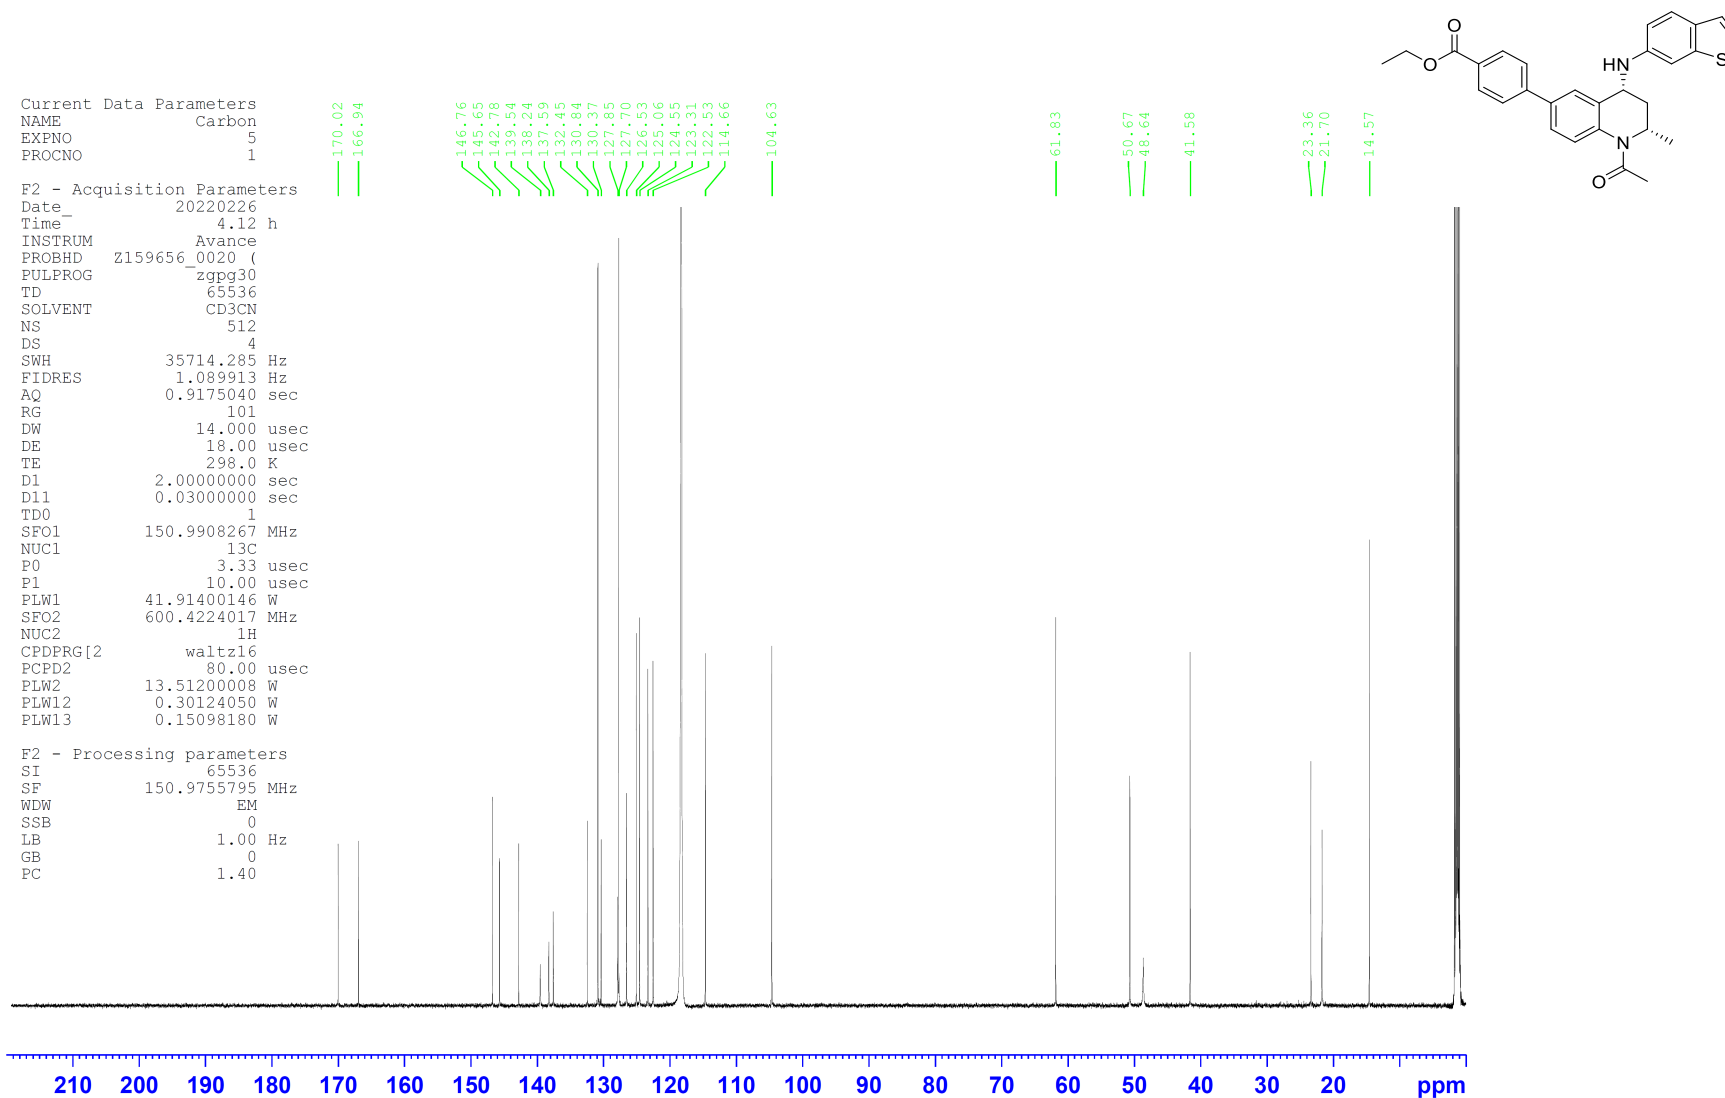



<sup>1</sup>H NMR 4-((2*S*,4*R*)-1-acetyl-4-[(1-benzothiophen-6-yl)amino]-2-methyl-1,2,3,4-tetrahydroquinolin-6-yl)benzoic acid (**9**)

Current Data Parameters  
NAME Proton  
EXPNO 1  
PROCNO 1

F2 - Acquisition Parameters  
Date\_ 20220308  
Time 10.11 h  
INSTRUM avh400  
PROBHD Z108618\_0873 (  
PULPROG zg60  
TD 65536  
SOLVENT CD3CN  
NS 16  
DS 2  
SWH 8012.820 Hz  
FIDRES 0.244532 Hz  
AQ 4.0894465 sec  
RG 88.17  
DW 62.400 usec  
DE 6.50 usec  
TE 296.9 K  
D1 1.00000000 sec  
TD0 1  
SFO1 400.1324008 MHz  
NUC1 1H  
P1 14.00 usec  
PLW1 14.36999989 W

F2 - Processing parameters  
SI 32768  
SF 400.1300113 MHz  
WDW EM  
SSB 0  
LB 0.30 Hz  
GB 0  
PC 1.00

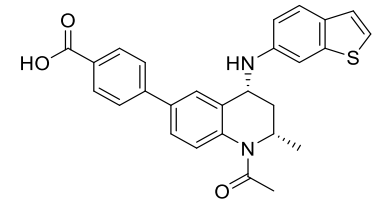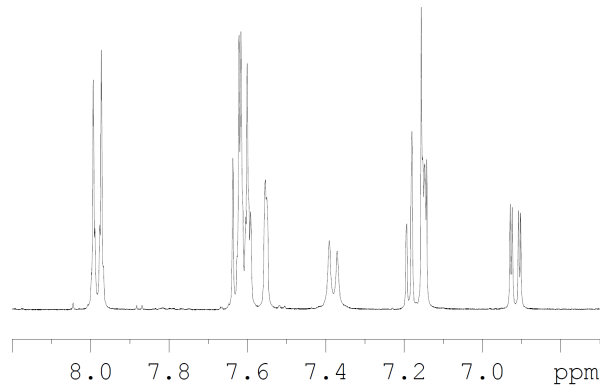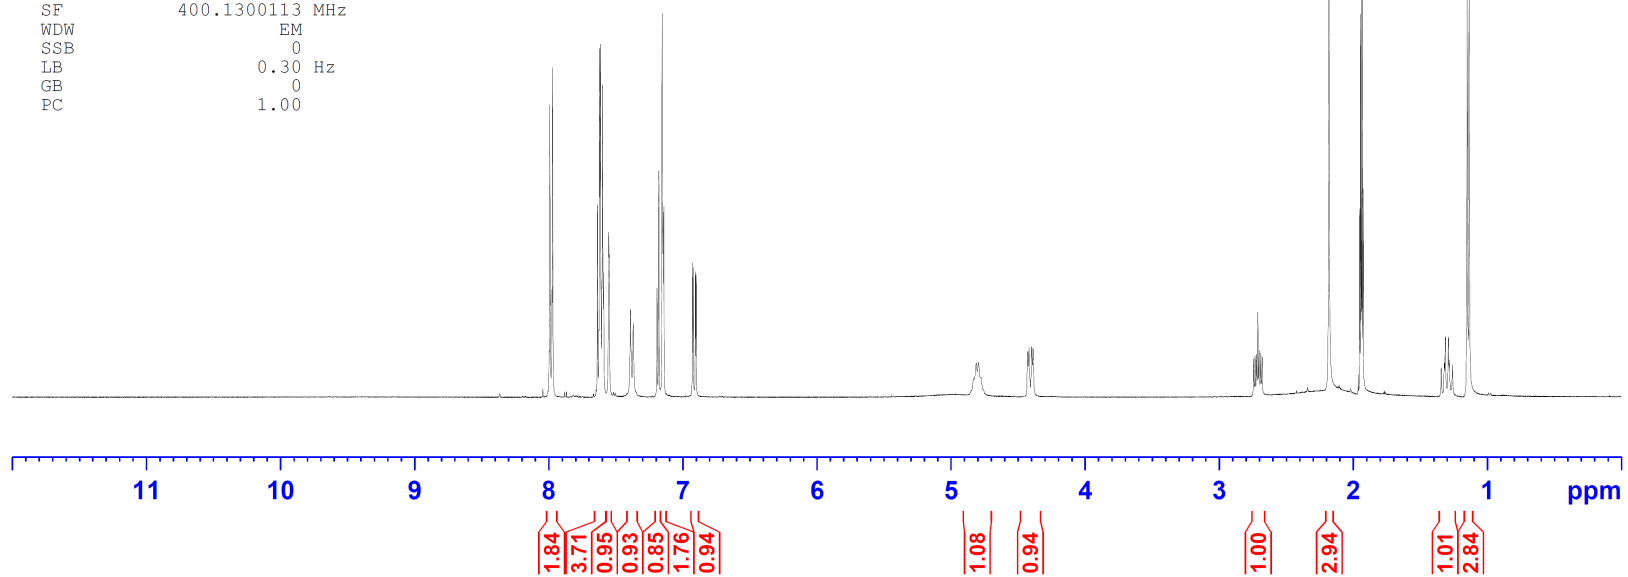

<sup>13</sup>C NMR 4-((2S,4R)-1-acetyl-4-[(1-benzothiophen-6-yl)amino]-2-methyl-1,2,3,4-tetrahydroquinolin-6-yl)benzoic acid (9)

Current Data Parameters  
NAME Carbon  
EXPNO 5  
PROCNO 1

F2 - Acquisition Parameters  
Date\_ 20220310  
Time\_ 17.29 h  
INSTRUM Avance  
PROBHD Z159656\_0020 ( zggg30  
PULPROG 65536  
TD 1024  
SOLVENT CD3CN  
NS 4  
DS 4  
SWH 35714.285 Hz  
FIDRES 1.089913 Hz  
AQ 0.9175040 sec  
RG 101  
DW 14.000 usec  
DE 18.00 usec  
TE 298.0 K  
D1 2.00000000 sec  
D11 0.03000000 sec  
TD0 1  
SFO1 150.9908267 MHz  
NUC1 13C  
P0 3.33 usec  
P1 10.00 usec  
PLW1 41.91400146 W  
SFO2 600.4224017 MHz  
NUC2 1H  
CPDPRG[2] waltz16  
PCPD2 80.00 usec  
PLW2 13.51200008 W  
PLW12 0.30124050 W  
PLW13 0.15098180 W

F2 - Processing parameters  
SI 65536  
SF 150.9755777 MHz  
WDW EM  
SSB 0  
LB 1.00 Hz  
GB 0  
PC 1.40

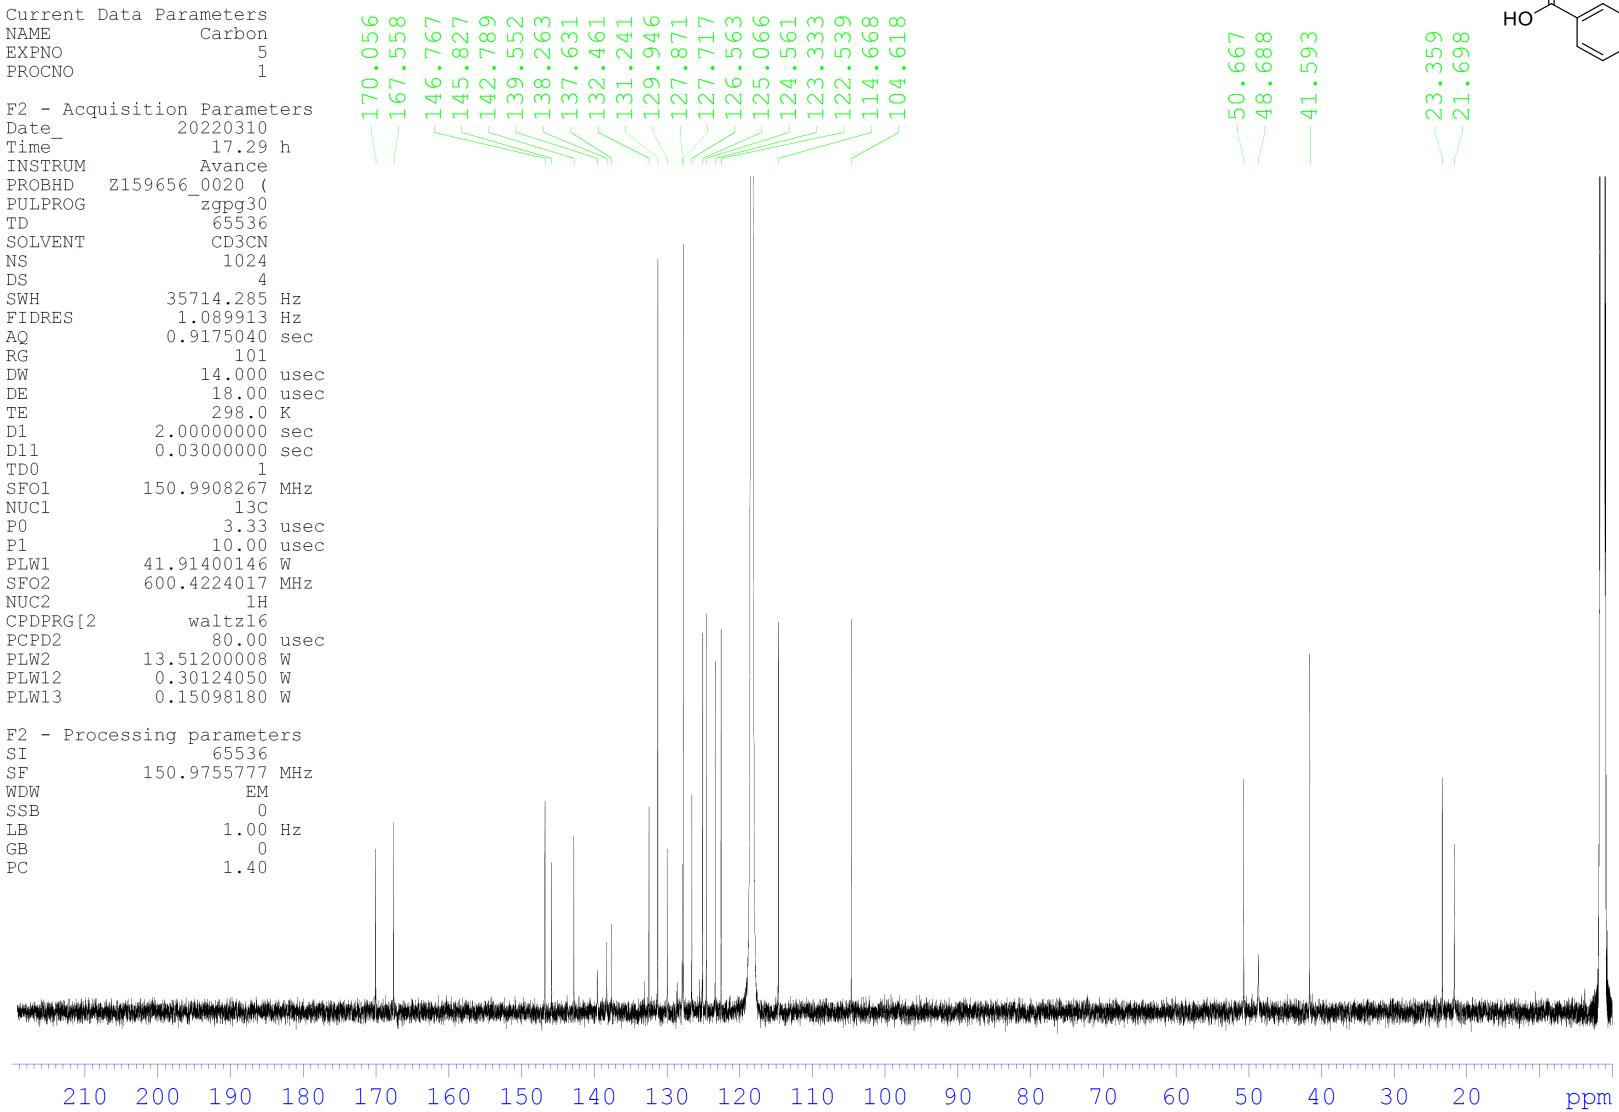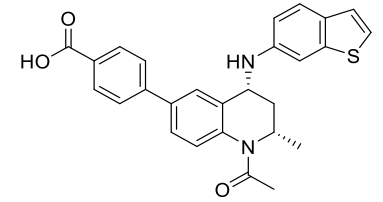

<sup>1</sup>H NMR ethyl 4-((2*R*,4*S*)-1-acetyl-4-[(1-benzothiophen-6-yl)amino]-2-methyl-1,2,3,4-tetrahydroquinolin-6-yl)benzoate (17)

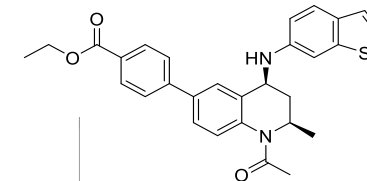

Current Data Parameters  
NAME DM-C-34  
EXPNO 1  
PROCNO 1

F2 - Acquisition Parameters  
Date\_ 20220222  
Time\_ 13.10 h  
INSTRUM avh400  
PROBHD Z108618\_0873 ( )  
PULPROG zg60  
TD 65536  
SOLVENT CD3CN  
NS 16  
DS 2  
SWH 8012.820 Hz  
FIDRES 0.244532 Hz  
AQ 4.0894465 sec  
RG 88.17  
DW 62.400 usec  
DE 6.50 usec  
TE 297.2 K  
D1 1.00000000 sec  
TD0 1  
SFO1 400.1324008 MHz  
NUC1 1H  
P1 14.00 usec  
PLW1 14.36999989 W

F2 - Processing parameters  
SI 32768  
SF 400.1300113 MHz  
WDW EM  
SSB 0  
LB 0.30 Hz  
GB 0  
PC 1.00

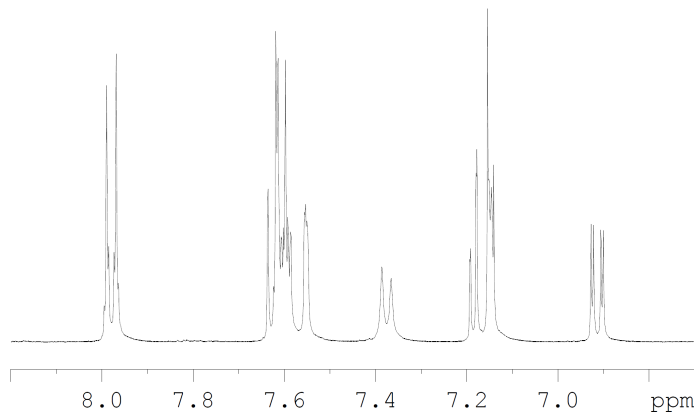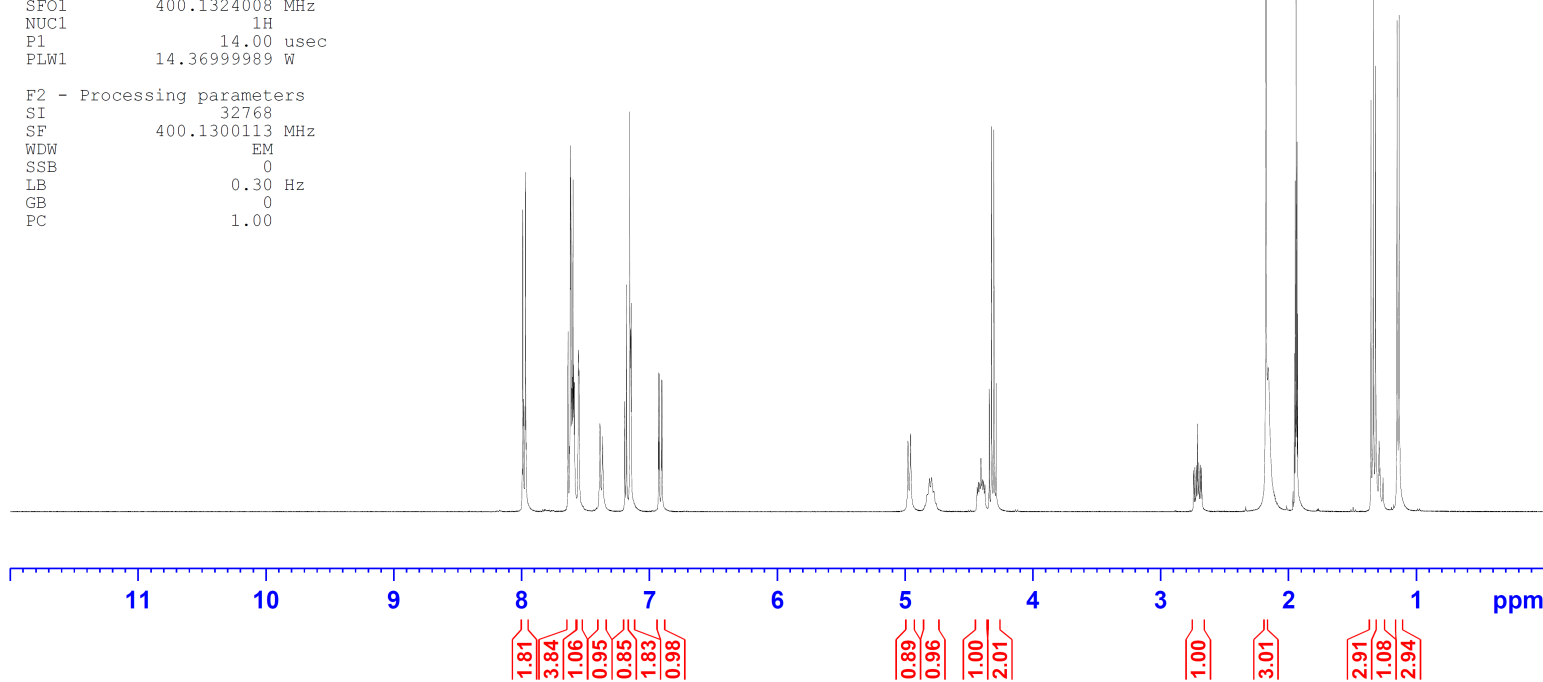

<sup>13</sup>C NMR ethyl 4-((2R,4S)-1-acetyl-4-[(1-benzothiophen-6-yl)amino]-2-methyl-1,2,3,4-tetrahydroquinolin-6-yl)benzoate (17)

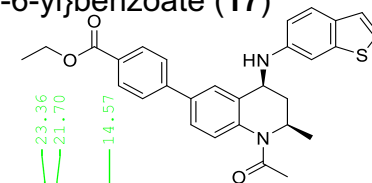

Current Data Parameters  
 NAME Carbon  
 EXPNO 5  
 PROCNO 1

F2 - Acquisition Parameters  
 Date\_ 20220226  
 Time\_ 10.38 h  
 INSTRUM Avance  
 PROBHD Z159656\_0020 (  
 PULPROG zgpg30  
 TD 65536  
 SOLVENT CD3CN  
 NS 512  
 DS 4  
 SWH 35714.285 Hz  
 FIDRES 1.089913 Hz  
 AQ 0.9175040 sec  
 RG 101  
 DW 14.000 usec  
 DE 18.00 usec  
 TE 298.0 K  
 D1 2.00000000 sec  
 D11 0.03000000 sec  
 TD0 1  
 SFO1 150.9908267 MHz  
 NUC1 13C  
 P0 3.33 usec  
 P1 10.00 usec  
 PLW1 41.91400146 W  
 SFO2 600.4224017 MHz  
 NUC2 1H  
 CPDPRG[2] waltz16  
 PCPD2 80.00 usec  
 PLW2 13.51200008 W  
 PLW12 0.30124050 W  
 PLW13 0.15098180 W

F2 - Processing parameters  
 SI 65536  
 SF 150.9755789 MHz  
 WDW EM  
 SSB 0  
 LB 1.00 Hz  
 GB 0  
 PC 1.40

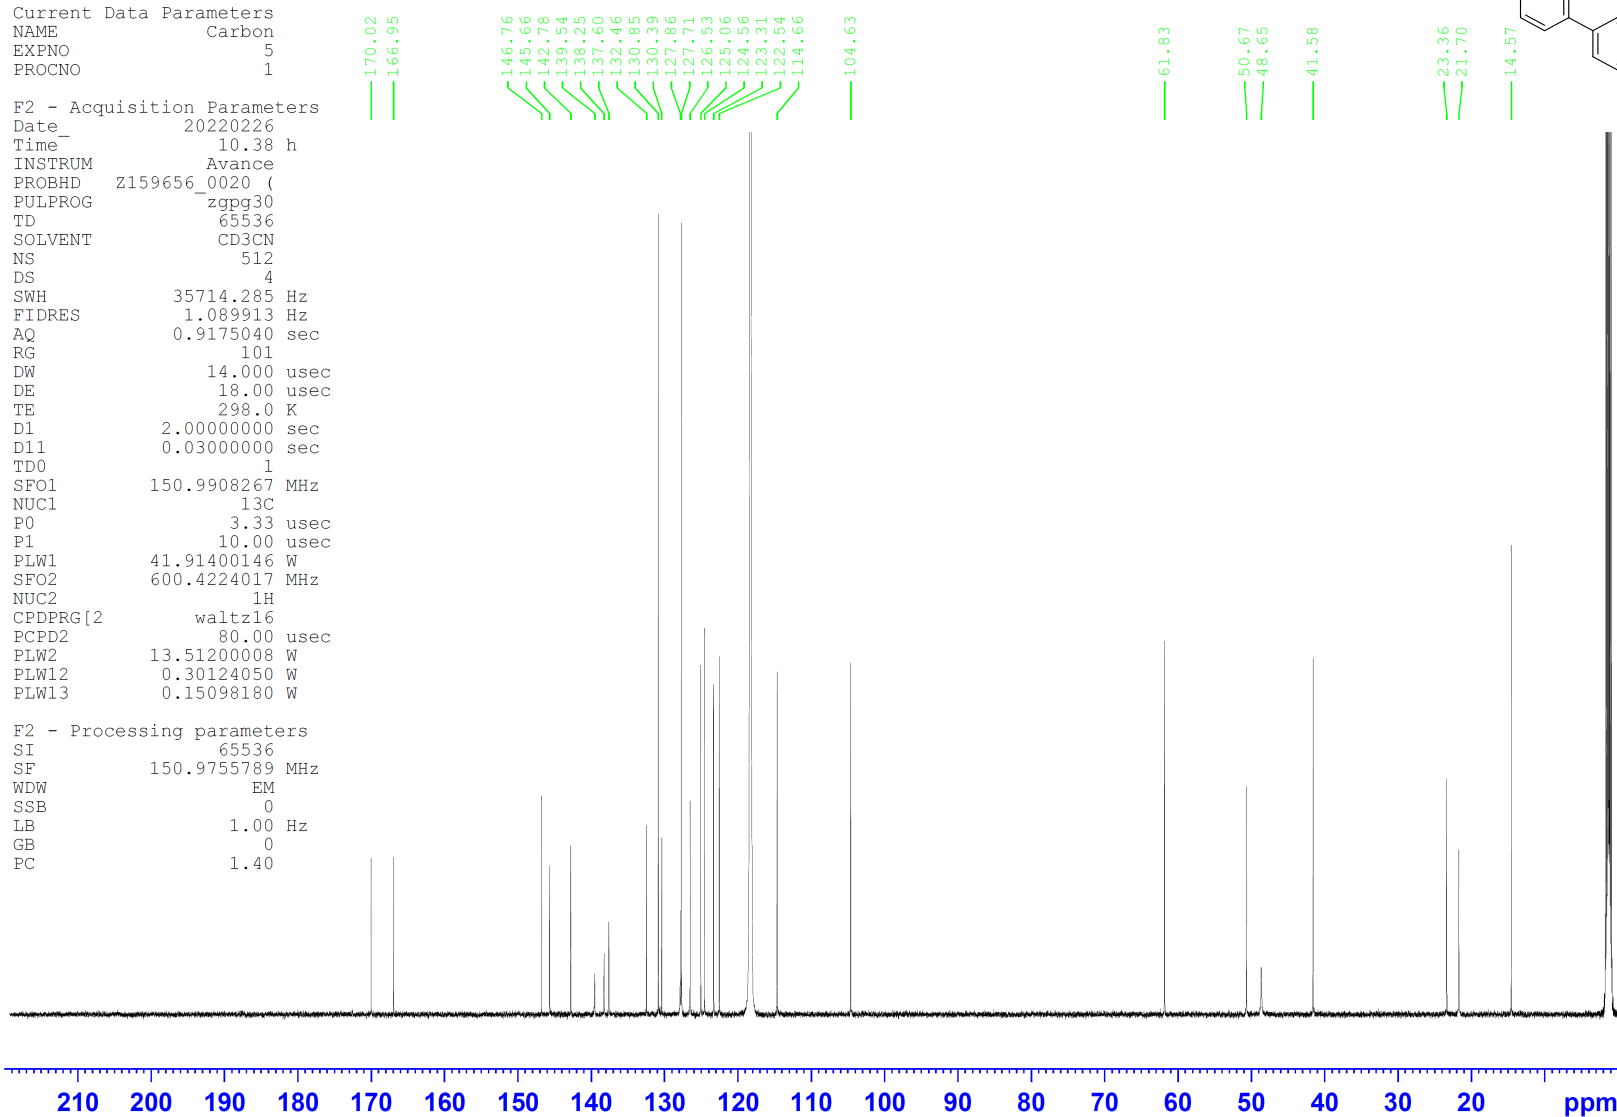

<sup>1</sup>H NMR 4-((2R,4S)-1-acetyl-4-[(1-benzothiophen-6-yl)amino]-2-methyl-1,2,3,4-tetrahydroquinolin-6-yl)benzoic acid (**10**)

Current Data Parameters  
NAME Proton  
EXPNO 1  
PROCNO 1

F2 - Acquisition Parameters  
Date\_ 20220222  
Time\_ 12.07 h  
INSTRUM avh400  
PROBHD Z108618\_0873 (  
PULPROG zg60  
TD 65536  
SOLVENT CD3CN  
NS 16  
DS 2  
SWH 8012.820 Hz  
FIDRES 0.244532 Hz  
AQ 4.0894465 sec  
RG 88.17  
DW 62.400 usec  
DE 6.50 usec  
TE 297.2 K  
D1 1.00000000 sec  
TD0 1  
SF01 400.1324008 MHz  
NUC1 1H  
P1 14.00 usec  
PLW1 14.36999989 W

F2 - Processing parameters  
SI 32768  
SF 400.1300113 MHz  
WDW EM  
SSB 0  
LB 0.30 Hz  
GB 0  
PC 1.00

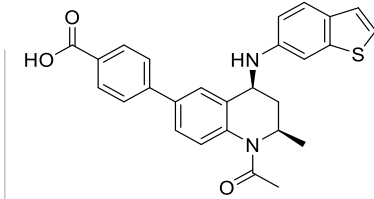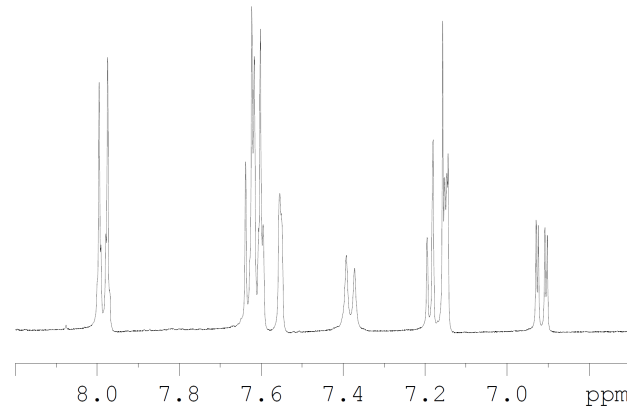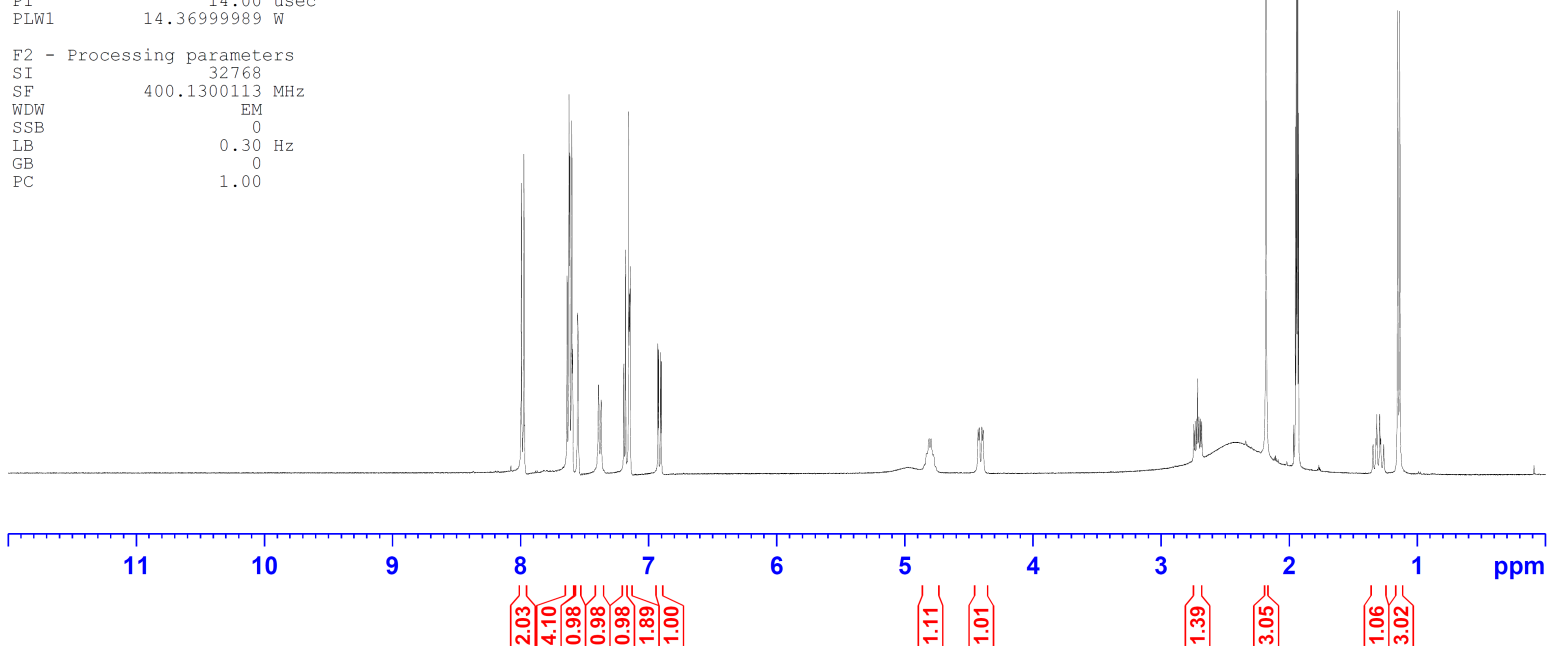

<sup>13</sup>C NMR 4-((2R,4S)-1-acetyl-4-[(1-benzothiophen-6-yl)amino]-2-methyl-1,2,3,4-tetrahydroquinolin-6-yl)benzoic acid (**10**)

```

Current Data Parameters
NAME          Carbon
EXPNO         5
PROCNO        1

F2 - Acquisition Parameters
Date_         20220225
Time          8.55 h
INSTRUM       Avance
PROBHD        Z159656_0020 (
PULPROG       zgpg30
TD            65536
SOLVENT       CD3CN
NS            512
DS            4
SWH           35714.285 Hz
FIDRES        1.089913 Hz
AQ            0.9175040 sec
RG            101
DW            14.000 usec
DE            18.00 usec
TE            298.0 K
D1            2.00000000 sec
D11           0.03000000 sec
TD0           1
SFO1          150.9908267 MHz
NUC1          13C
P0            3.33 usec
P1            10.00 usec
PLW1          41.91400146 W
SFO2          600.4224017 MHz
NUC2          1H
CPDPRG12     waltz16
PCPD2        80.00 usec
PLW2          13.51200008 W
PLW12         0.30124050 W
PLW13         0.15098180 W

F2 - Processing parameters
SI            65536
SF            150.9755785 MHz
WDW           EM
SSB           0
LB            1.00 Hz
GB            0
PC            1.40
    
```

170.096  
167.640  
146.761  
145.788  
142.784  
139.547  
138.234  
137.647  
132.454  
131.233  
130.021  
127.866  
127.704  
126.558  
125.063  
124.558  
123.326  
122.536  
114.664  
104.613

50.658  
48.668  
41.580

23.355  
21.692

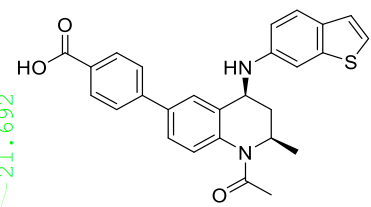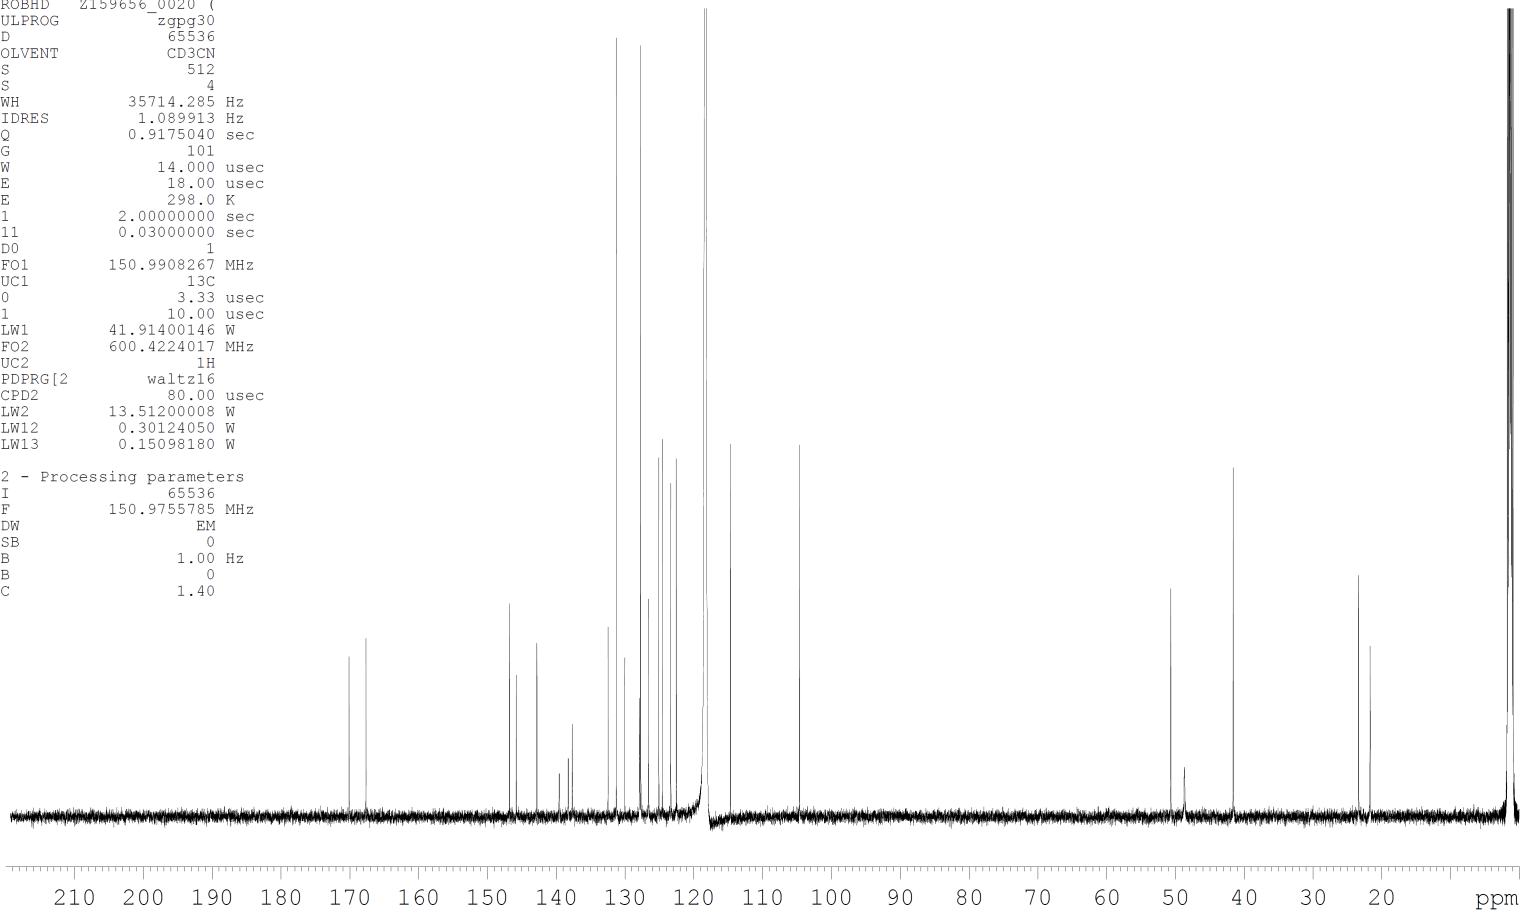

<sup>1</sup>H NMR ethyl 4-((2*S*,4*R*)-1-acetyl-4-[(1-benzofuran-6-yl)amino]-2-methyl-1,2,3,4-tetrahydroquinolin-6-yl)benzoate (**18**)

Current Data Parameters  
NAME Proton  
EXPNO 1  
PROCNO 1

F2 - Acquisition Parameters  
Date\_ 20220222  
Time\_ 13.14 h  
INSTRUM avh400  
PROBHD z108618\_0873 (  
PULPROG zg60  
TD 65536  
SOLVENT CD3CN  
NS 16  
DS 2  
SWH 8012.820 Hz  
FIDRES 0.244532 Hz  
AQ 4.0894465 sec  
RG 88.17  
DW 62.400 usec  
DE 6.50 usec  
TE 297.2 K  
D1 1.00000000 sec  
TD0 1  
SFO1 400.1324008 MHz  
NUC1 1H  
P1 14.00 usec  
PLW1 14.36999989 W

F2 - Processing parameters  
SI 32768  
SF 400.1300114 MHz  
WDW EM  
SSB 0  
LB 0.30 Hz  
GB 0  
PC 1.00

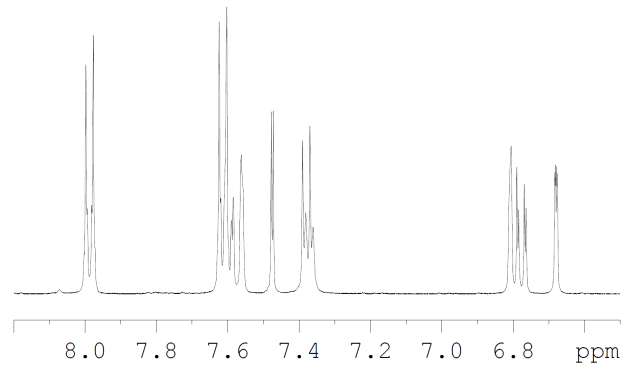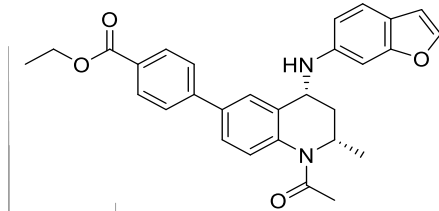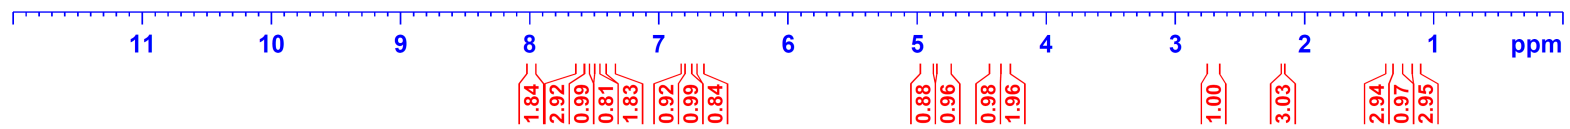

<sup>13</sup>C NMR ethyl 4-((2S,4R)-1-acetyl-4-[(1-benzofuran-6-yl)amino]-2-methyl-1,2,3,4-tetrahydroquinolin-6-yl)benzoate (**18**)

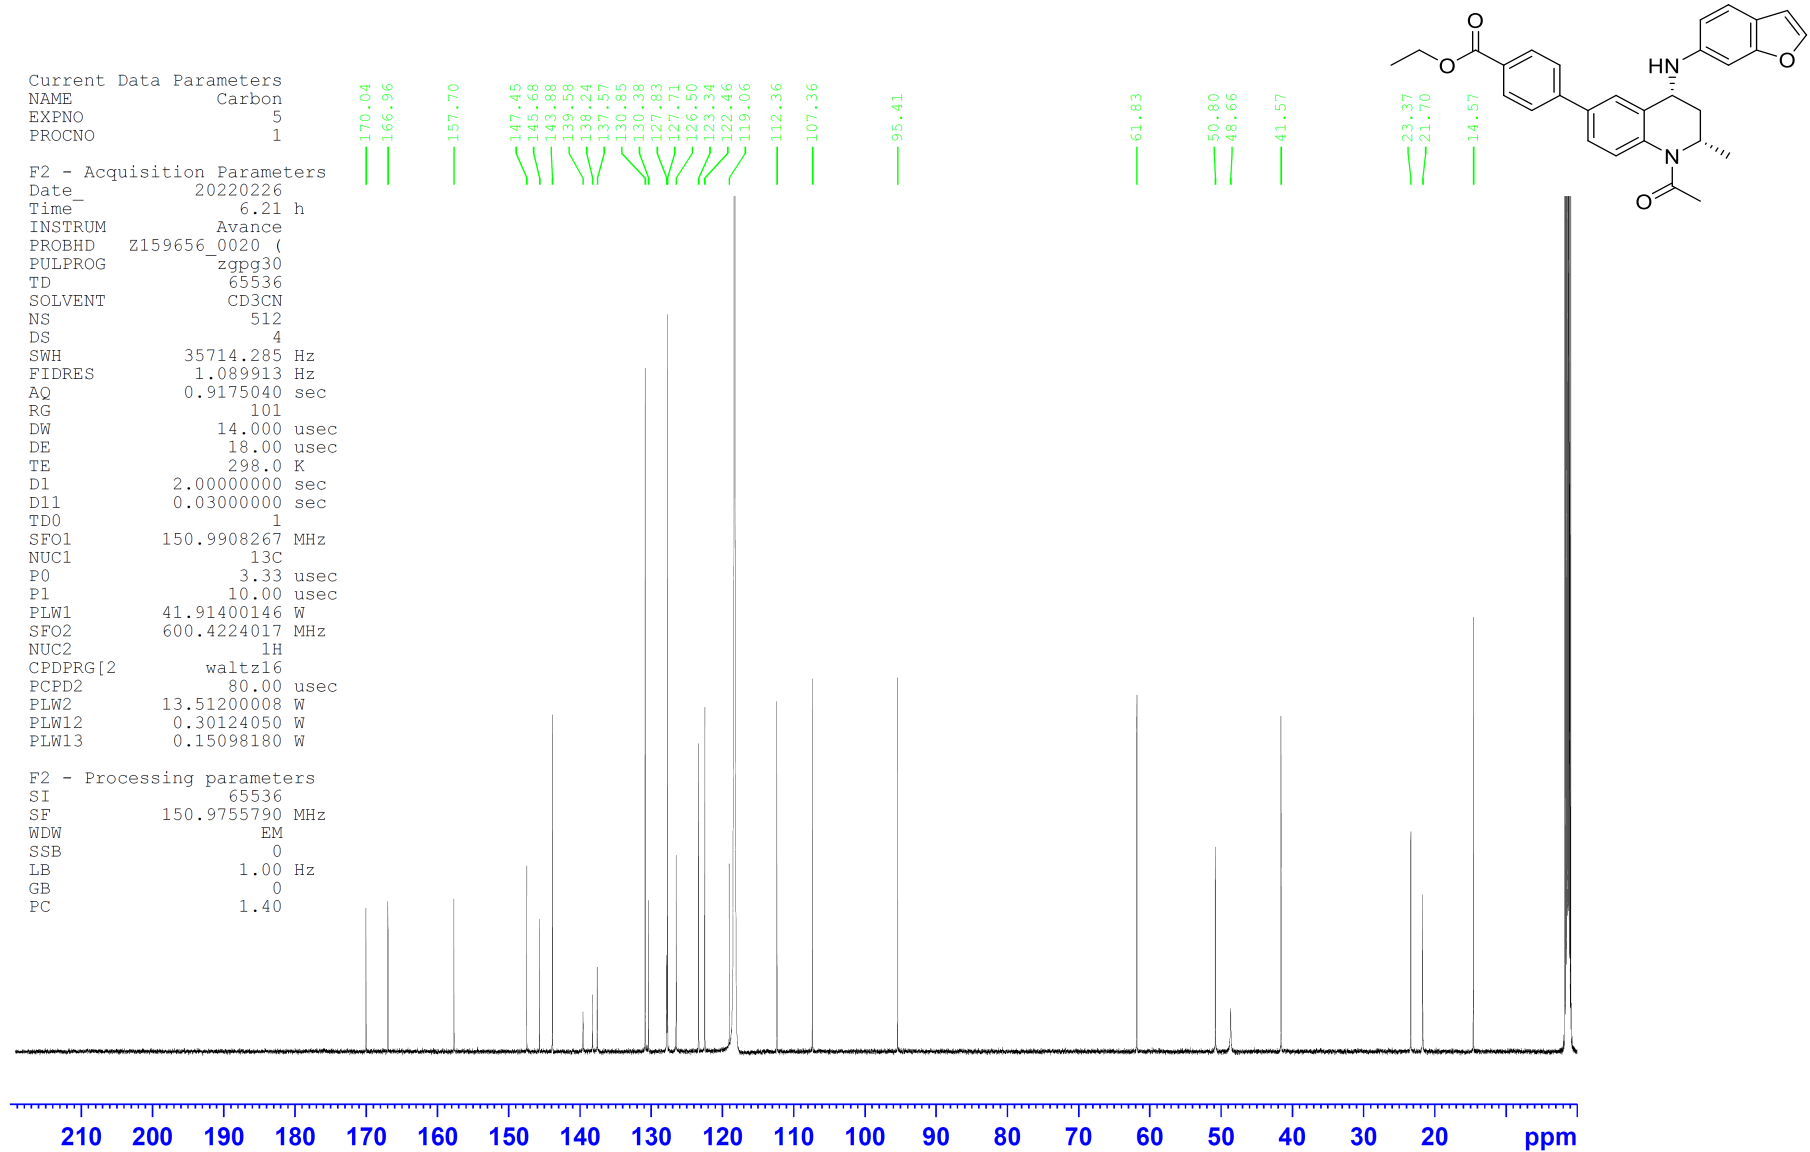



<sup>1</sup>H NMR 4-((2S,4R)-1-acetyl-4-[(1-benzofuran-6-yl)amino]-2-methyl-1,2,3,4-tetrahydroquinolin-6-yl)benzoic acid (**11**)

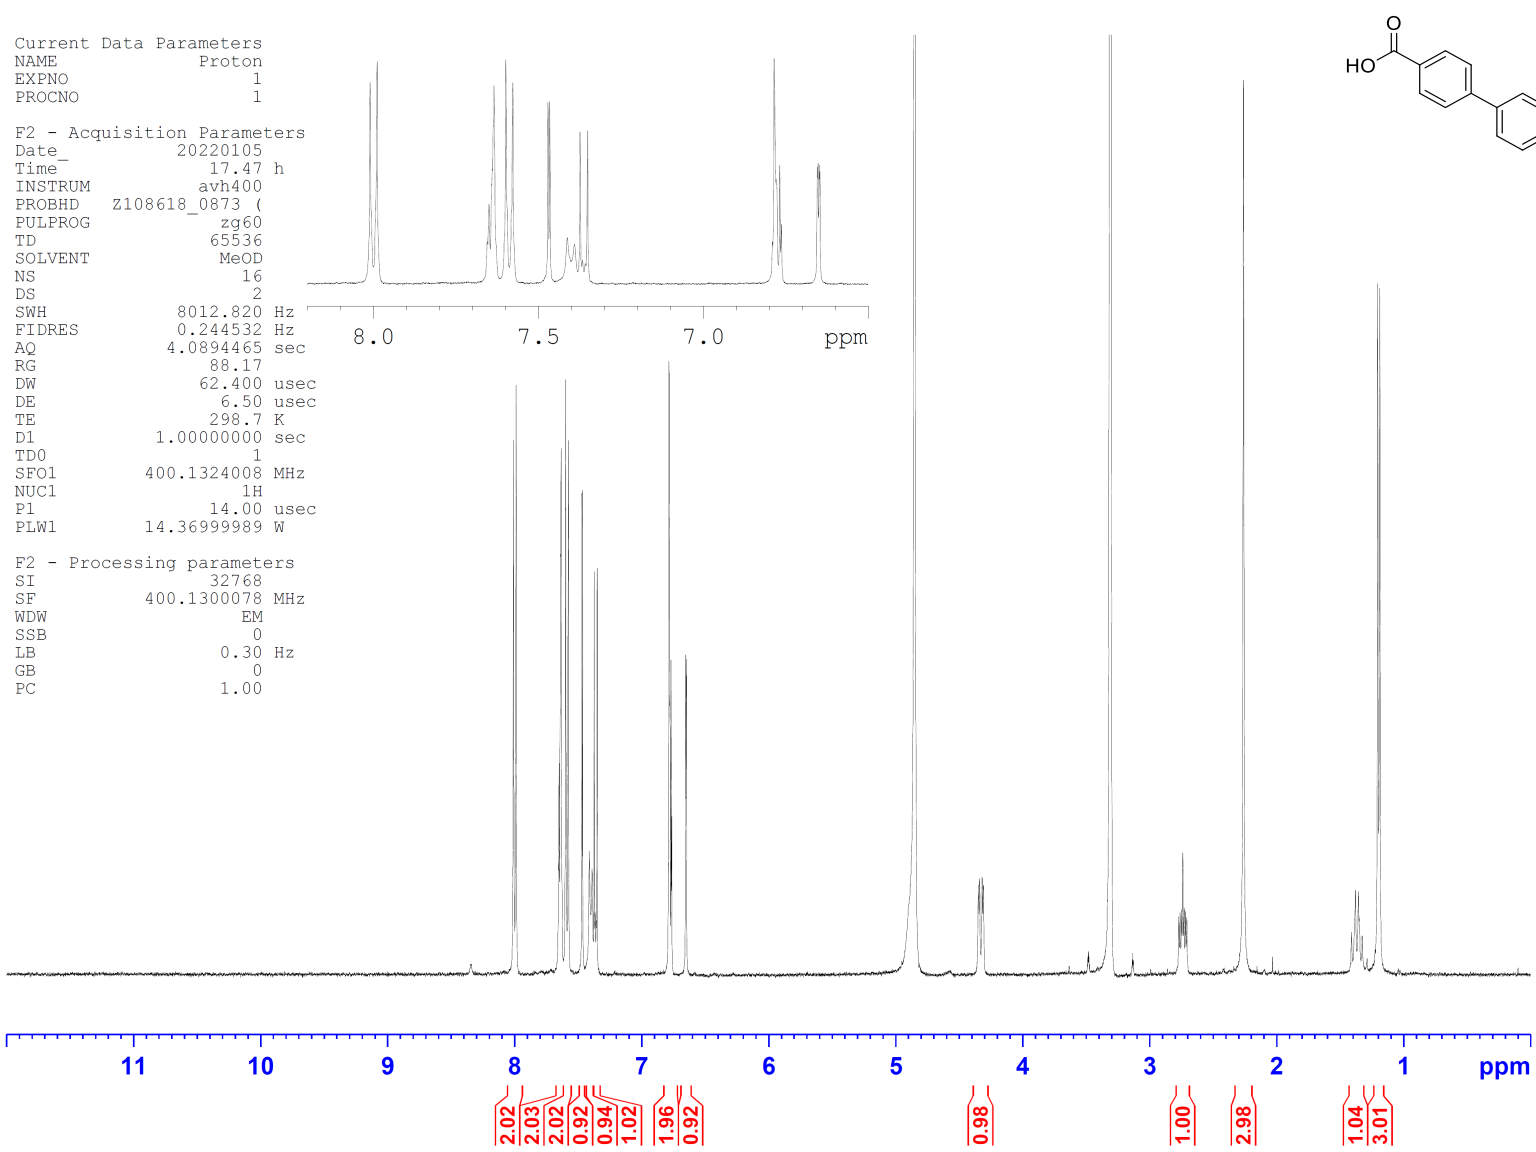

<sup>13</sup>C NMR 4-((2*S*,4*R*)-1-acetyl-4-[(1-benzofuran-6-yl)amino]-2-methyl-1,2,3,4-tetrahydroquinolin-6-yl)benzoic acid (**11**)

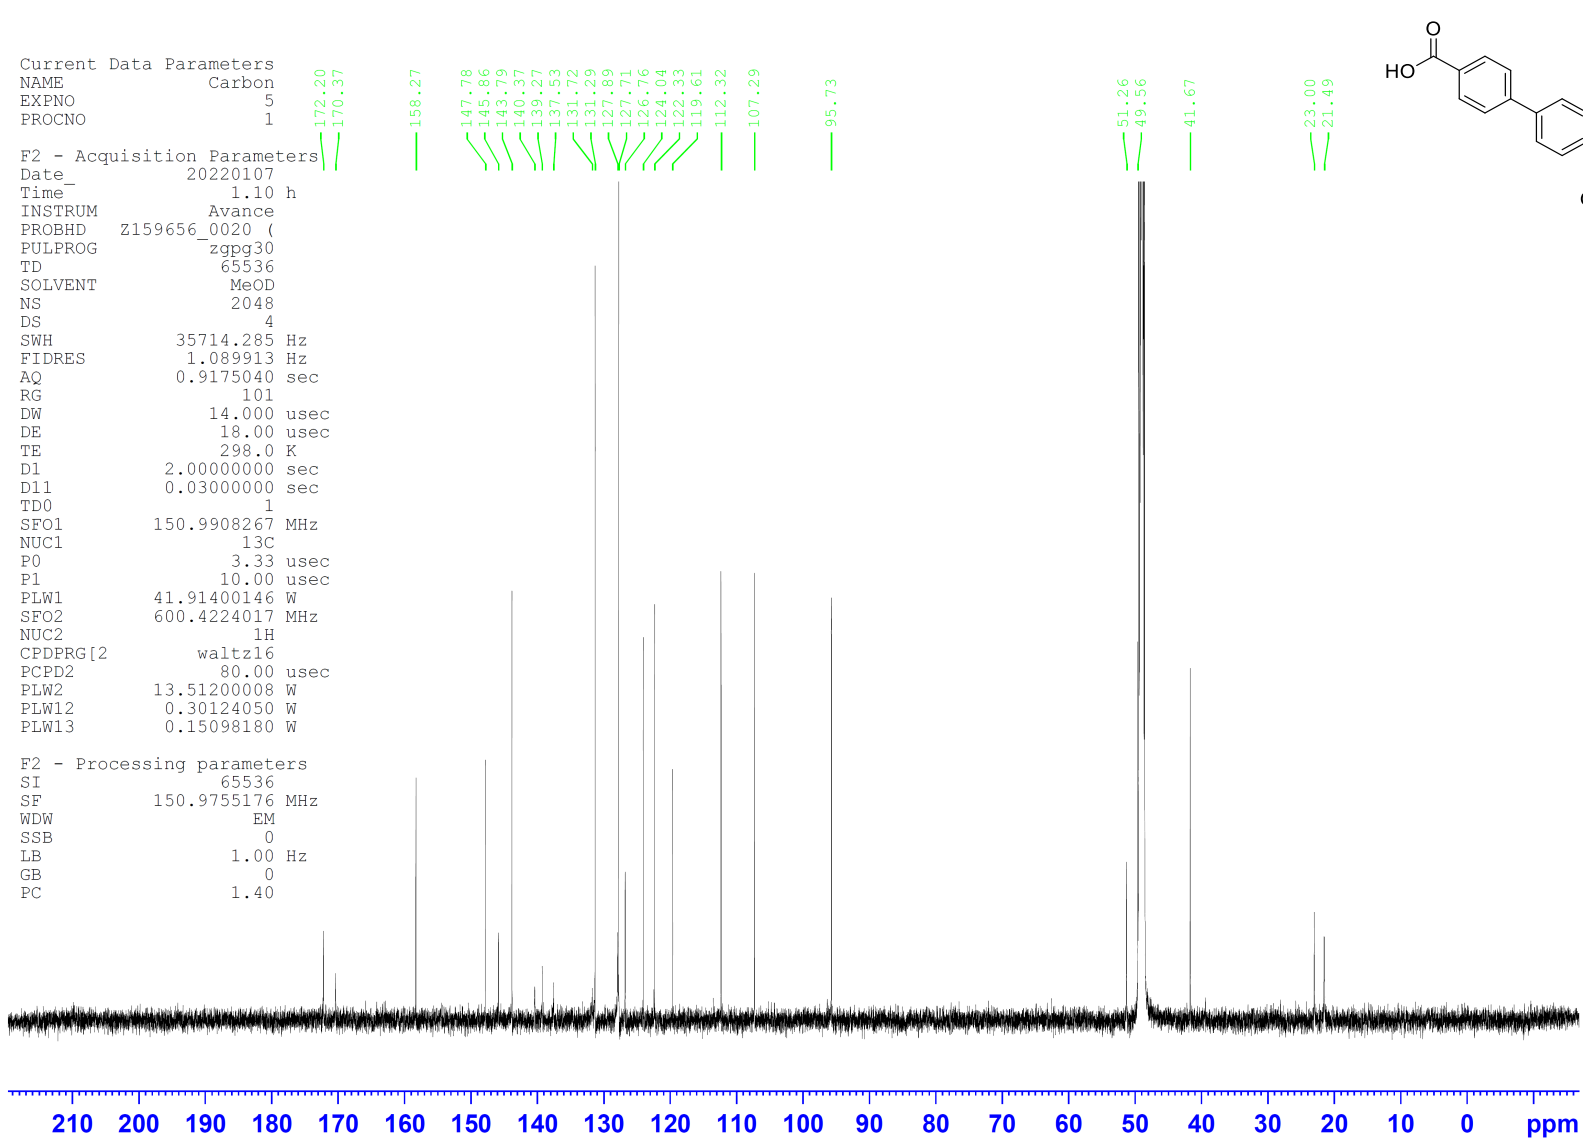



<sup>13</sup>C NMR ethyl 4-((2S,4R)-1-acetyl-4-[(1-benzothiophen-5-ylamino)-2-methyl-1,2,3,4-tetrahydroquinolin-6-yl]benzoate (19)

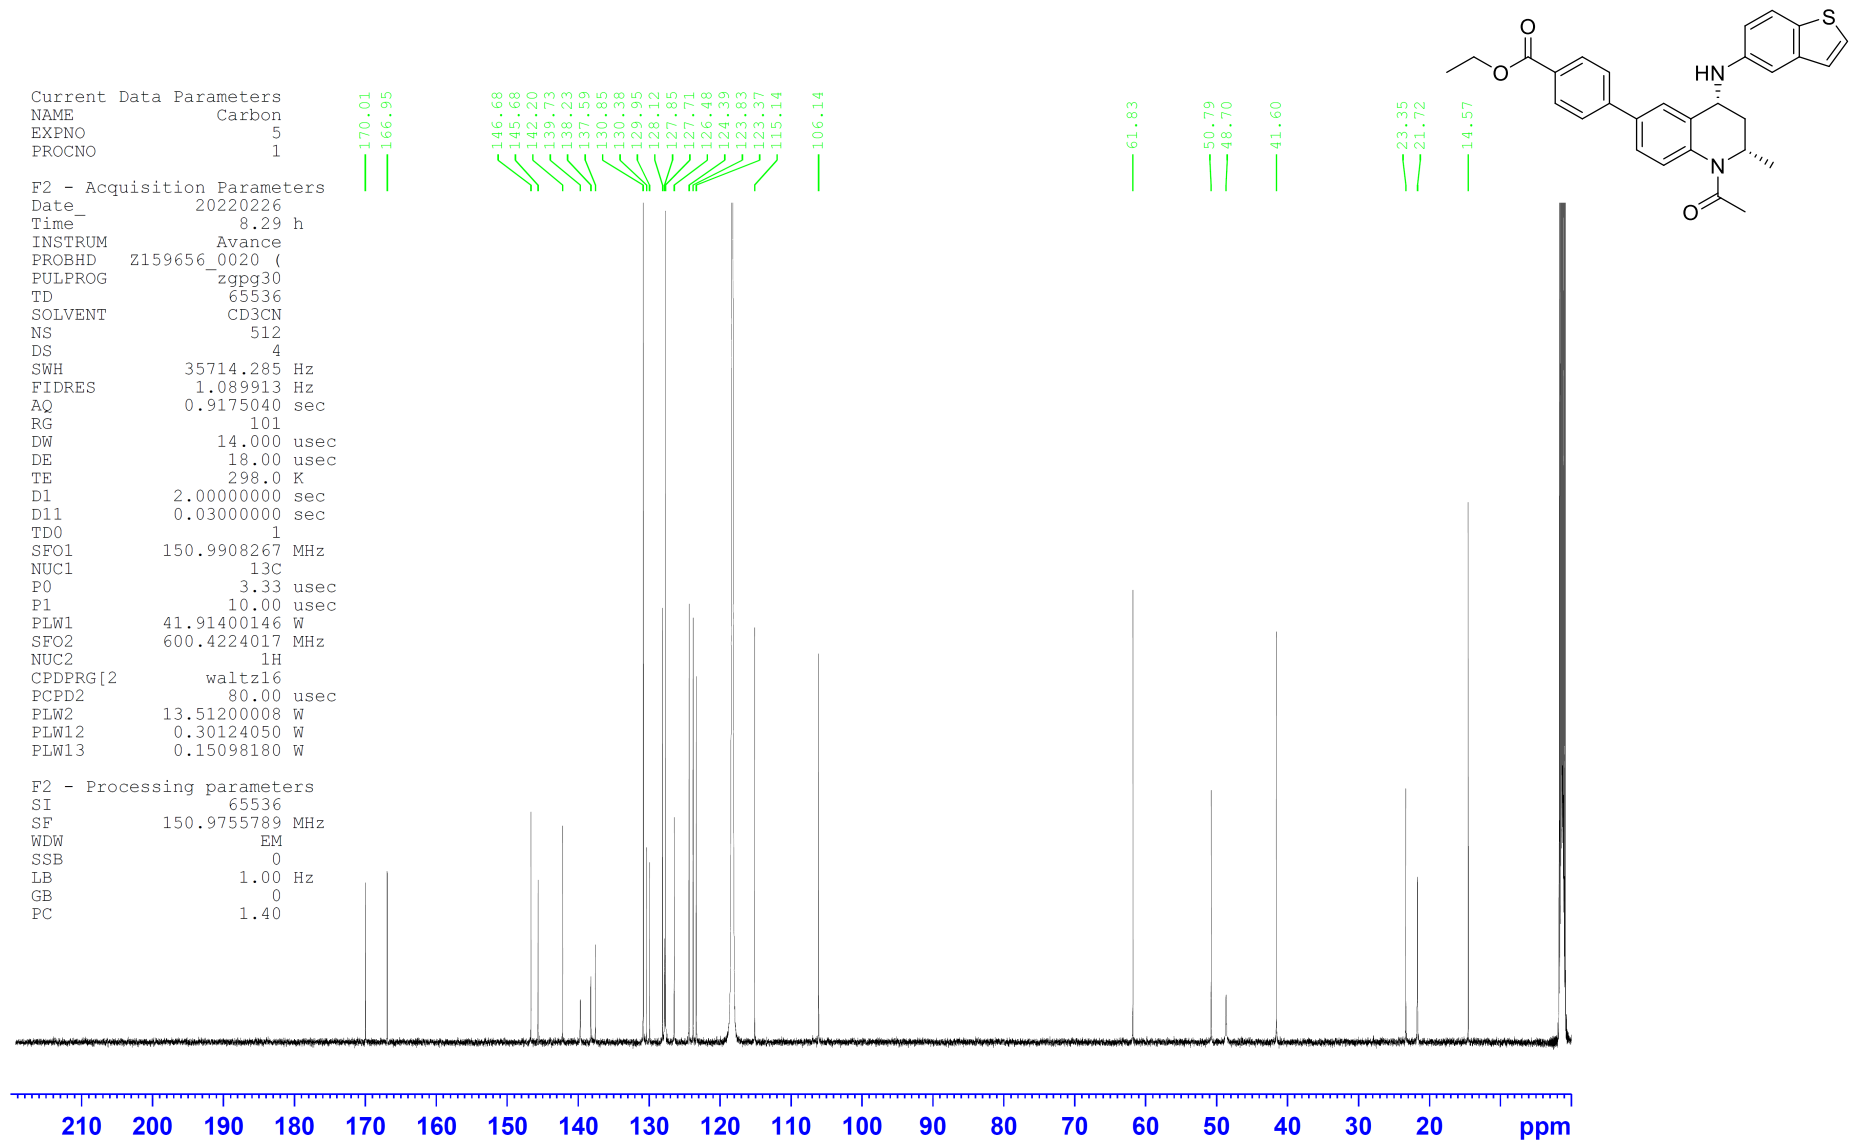

<sup>1</sup>H NMR 4-((2*S*,4*R*)-1-acetyl-4-[(1-benzothiophen-5-yl)amino]-2-methyl-1,2,3,4-tetrahydroquinolin-6-yl)benzoic acid (**12**)

Current Data Parameters  
NAME Proton  
EXPNO 1  
PROCNO 1

F2 - Acquisition Parameters  
Date\_ 20220222  
Time\_ 12.03 h  
INSTRUM avh400  
PROBHD Z108618\_0873 (  
PULPROG zgpg30  
TD 65536  
SOLVENT CD3CN  
NS 16  
DS 2  
SWH 8012.820 Hz  
FIDRES 0.244532 Hz  
AQ 4.0894465 sec  
RG 88.17  
DW 62.400 usec  
DE 6.50 usec  
TE 297.2 K  
D1 1.00000000 sec  
TD0 1  
SF01 400.1324008 MHz  
NUC1 1H  
P1 14.00 usec  
PLW1 14.36999989 W

F2 - Processing parameters  
SI 32768  
SF 400.1300113 MHz  
WDW EM  
SSB 0  
LB 0.30 Hz  
GB 0  
PC 1.00

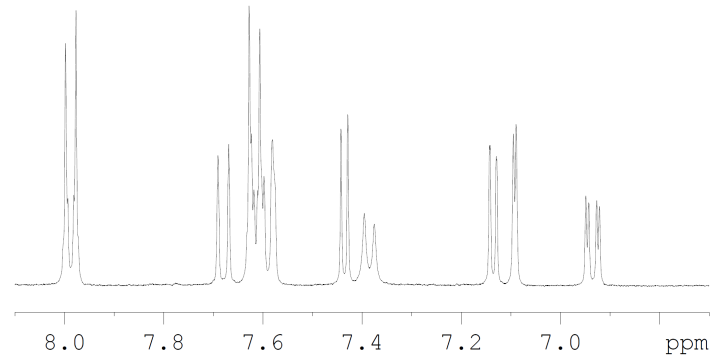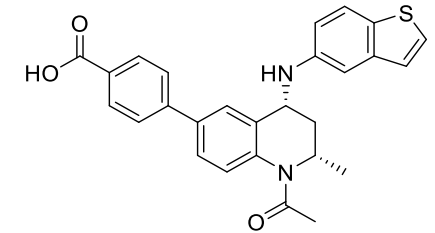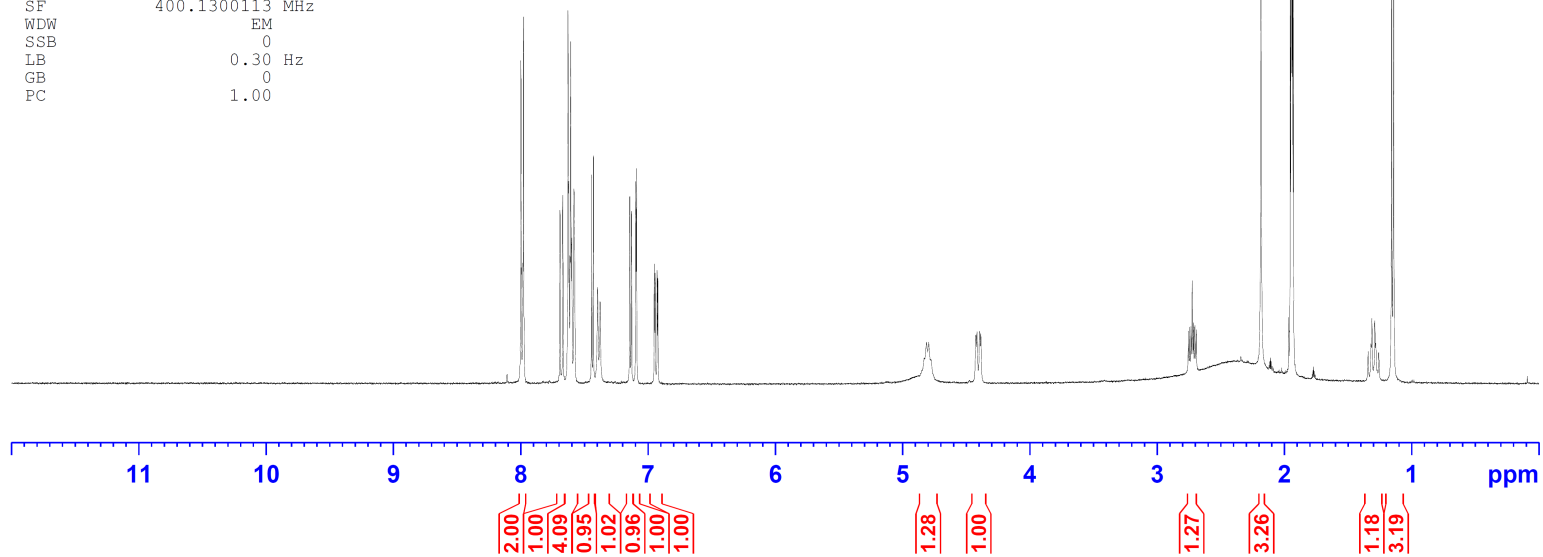

<sup>13</sup>C NMR 4-((2*S*,4*R*)-1-acetyl-4-[(1-benzothiophen-5-yl)amino]-2-methyl-1,2,3,4-tetrahydroquinolin-6-yl)benzoic acid (**12**)

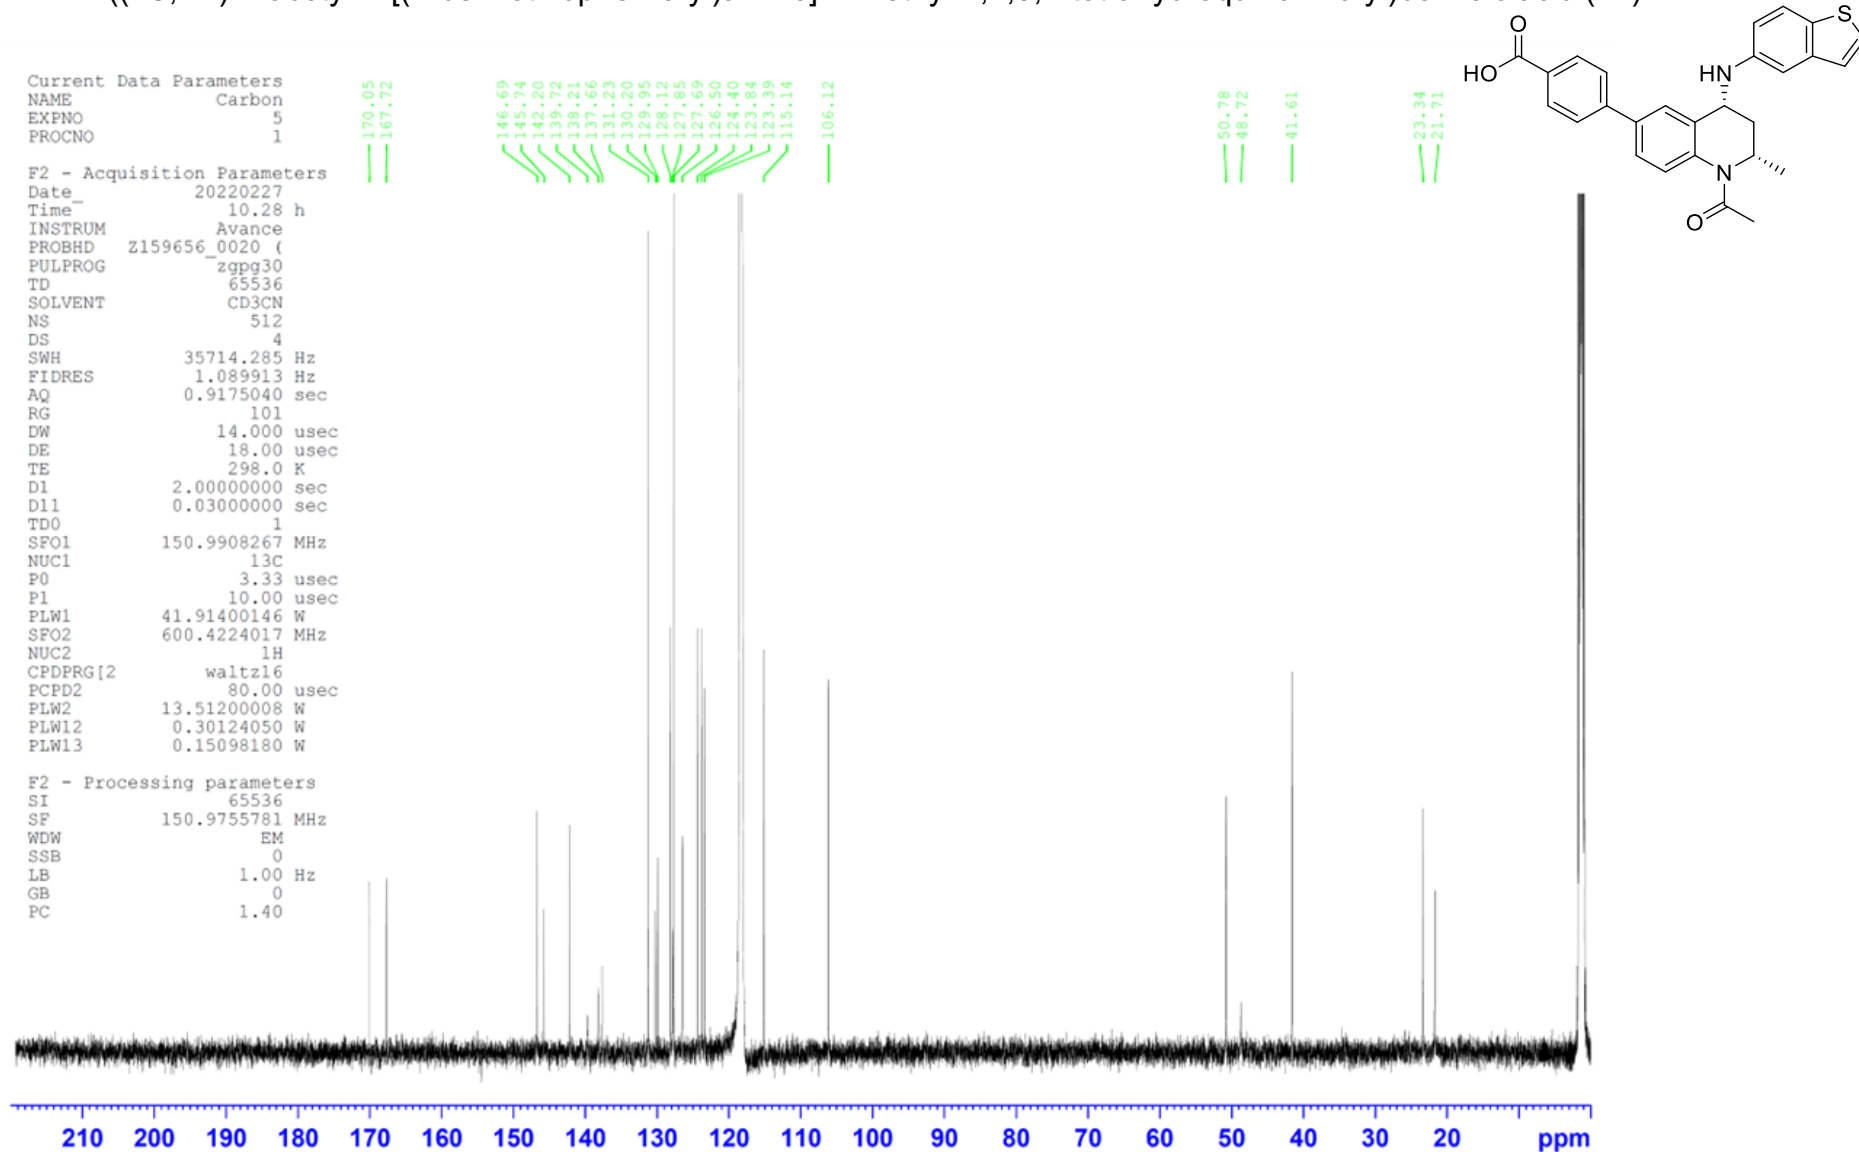

<sup>1</sup>H NMR *tert*-butyl 5- $\{(2S,4R)\}$ -(1-acetyl-6-[4-(ethoxycarbonyl)phenyl]-2-methyl-1,2,3,4-tetrahydroquinolin-4-yl)amino}-1*H*-indole-1-carboxylate (**S9**)

Current Data Parameters  
NAME Proton  
EXPNO 1  
PROCNO 1

F2 - Acquisition Parameters  
Date\_ 20210301  
Time\_ 8.44 h  
INSTRUM avh400  
PROBHD Z108618\_0873 (  
PULPROG zg60  
TD 65536  
SOLVENT CDCl3  
NS 16  
DS 2  
SWH 8012.820 Hz  
FIDRES 0.244532 Hz  
AQ 4.0894465 sec  
RG 37.97  
DW 62.400 usec  
DE 6.50 usec  
TE 300.7 K  
D1 1.00000000 sec  
TD0 1  
SF01 400.1324008 MHz  
NUC1 1H  
P1 14.00 usec  
PLW1 14.36999989 W

F2 - Processing parameters  
SI 32768  
SF 400.1300103 MHz  
WDW EM  
SSB 0  
LB 0.30 Hz  
GB 0  
PC 1.00

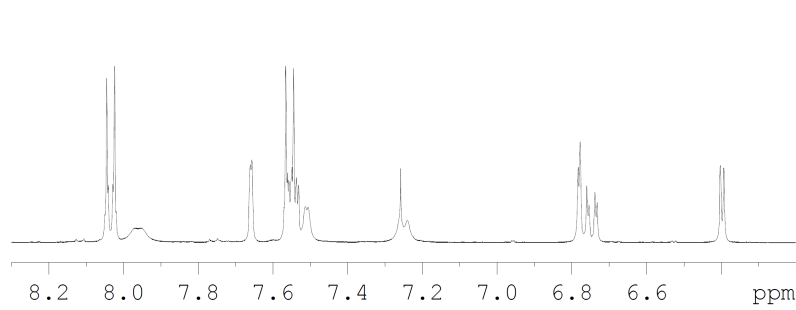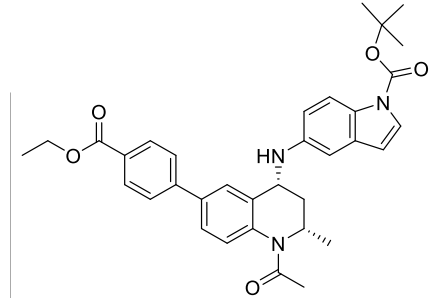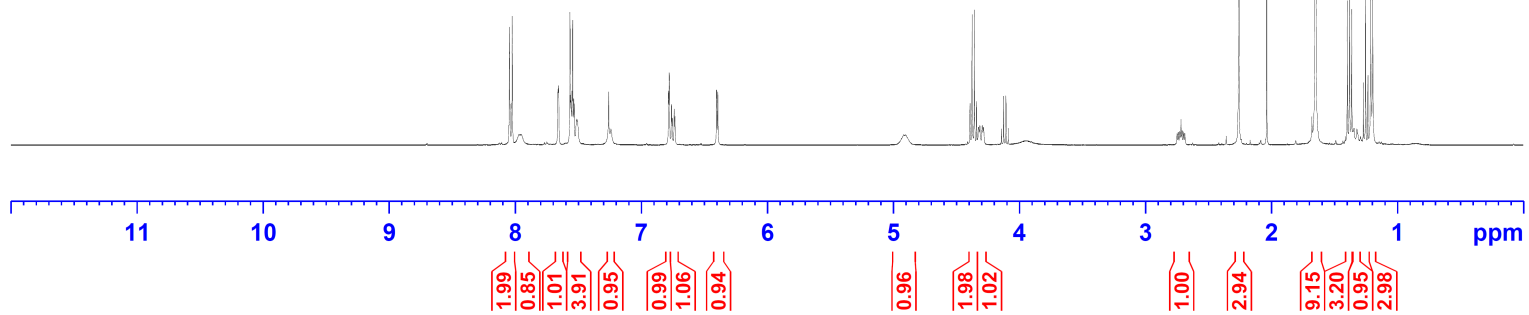

<sup>13</sup>C NMR *tert*-butyl 5-((2*S*,4*R*)-(1-acetyl-6-[4-(ethoxycarbonyl)phenyl]-2-methyl-1,2,3,4-tetrahydroquinolin-4-yl)amino)-1*H*-indole-1-carboxylate (**S9**)

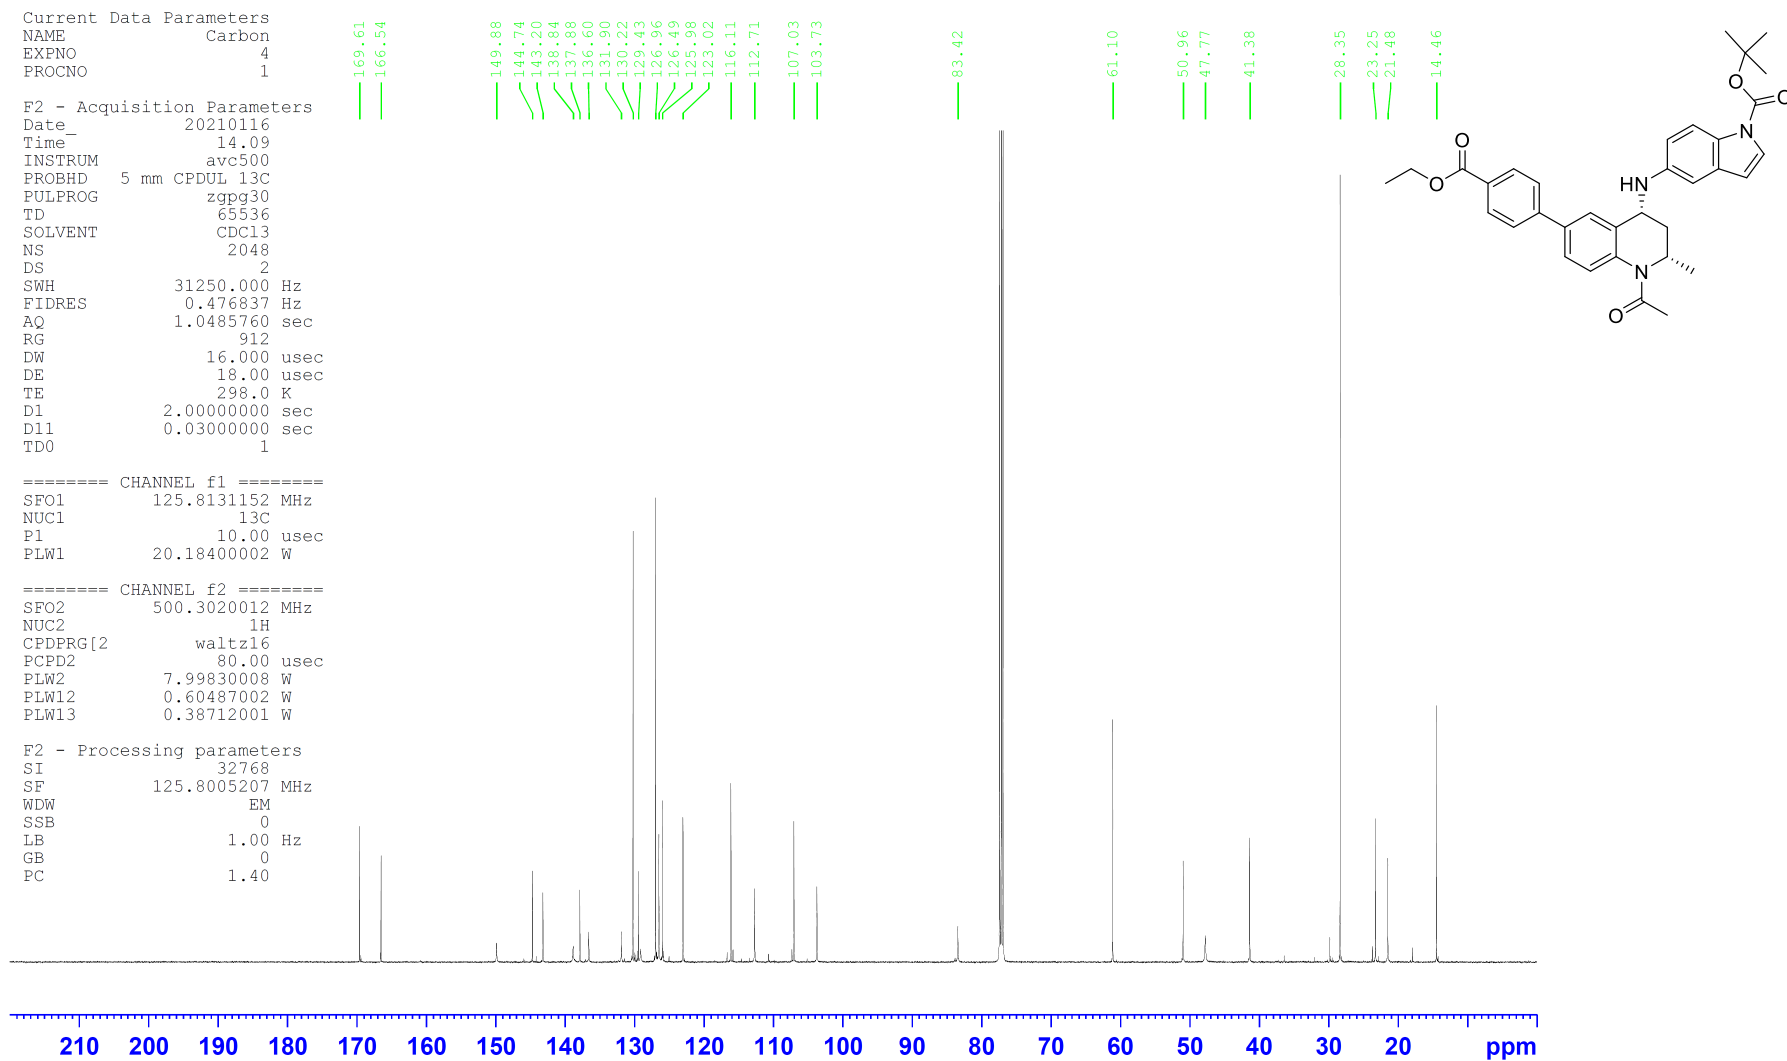



<sup>1</sup>H NMR ethyl 4-((2S,4R)-1-acetyl-4-((1H-indol-5-yl)amino)-2-methyl-1,2,3,4-tetrahydroquinolin-6-yl)benzoate (20)

Current Data Parameters  
NAME Proton  
EXPNO 1  
PROCNO 1

F2 - Acquisition Parameters  
Date\_ 20210416  
Time\_ 9.31 h  
INSTRUM av600  
PROBHD z130037\_0008 (   
PULPROG zg30  
TD 65536  
SOLVENT CD3CN  
NS 16  
DS 2  
SWH 12019.230 Hz  
FIDRES 0.366798 Hz  
AQ 2.7262976 sec  
RG 197.67  
DW 41.600 usec  
DE 10.00 usec  
TE 298.0 K  
D1 1.00000000 sec  
TDO 1  
SFO1 600.1830009 MHz  
NUC1 1H  
PO 4.00 usec  
P1 12.00 usec  
PLW1 24.00000000 W

F2 - Processing parameters  
SI 65536  
SF 600.1800168 MHz  
WDW EM  
SSB 0  
LB 0.30 Hz  
GB 0  
PC 1.00

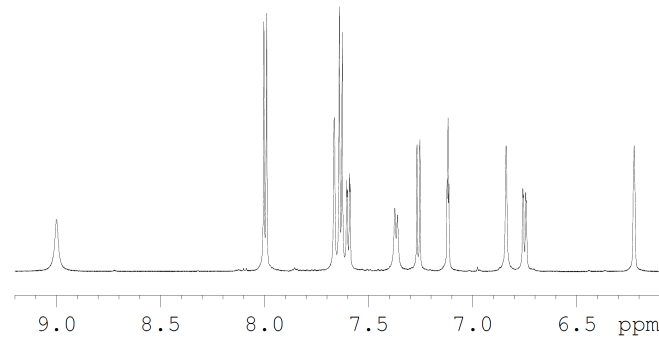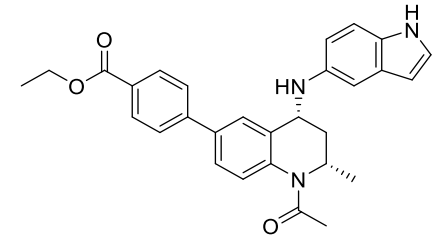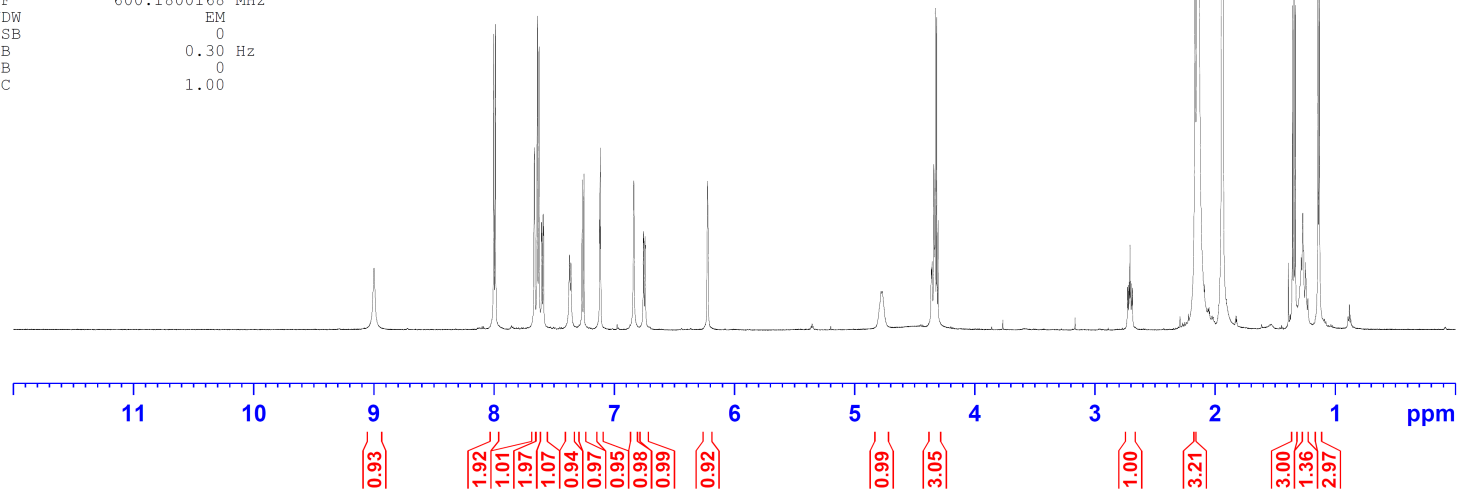

<sup>13</sup>C NMR ethyl 4-((2S,4R)-1-acetyl-4-((1H-indol-5-yl)amino)-2-methyl-1,2,3,4-tetrahydroquinolin-6-yl)benzoate (20)

Current Data Parameters  
NAME Carbon  
EXPTNO 5  
PROCNO 1

F2 - Acquisition Parameters  
Date\_ 20210416  
Time 11.53 h  
INSTRUM av600  
PROBHD Z130037\_0008 ( zppg30  
PULPROG 65536  
TD 65536  
SOLVENT CD3CN  
NS 1921  
DS 4  
SWH 36057.691 Hz  
FIDRES 1.100393 Hz  
AQ 0.9087659 sec  
RG 197.67  
DW 13.867 usec  
DE 18.00 usec  
TE 298.0 K  
D1 2.00000000 sec  
D11 0.03000000 sec  
TD0 1  
SFO1 150.9304719 MHz  
NUC1 13C  
P0 3.33 usec  
P1 10.00 usec  
PLW1 64.00000000 W  
SFO2 600.1824007 MHz  
NUC2 1H  
CPDPRG[2] waltz16  
PCPD2 70.00 usec  
PLW2 24.00000000 W  
PLW12 0.70530999 W  
PLW13 0.35475999 W

F2 - Processing parameters  
SI 32768  
SF 150.9152316 MHz  
WDW EM  
SSB 0  
LB 1.00 Hz  
GB 0  
PC 1.40

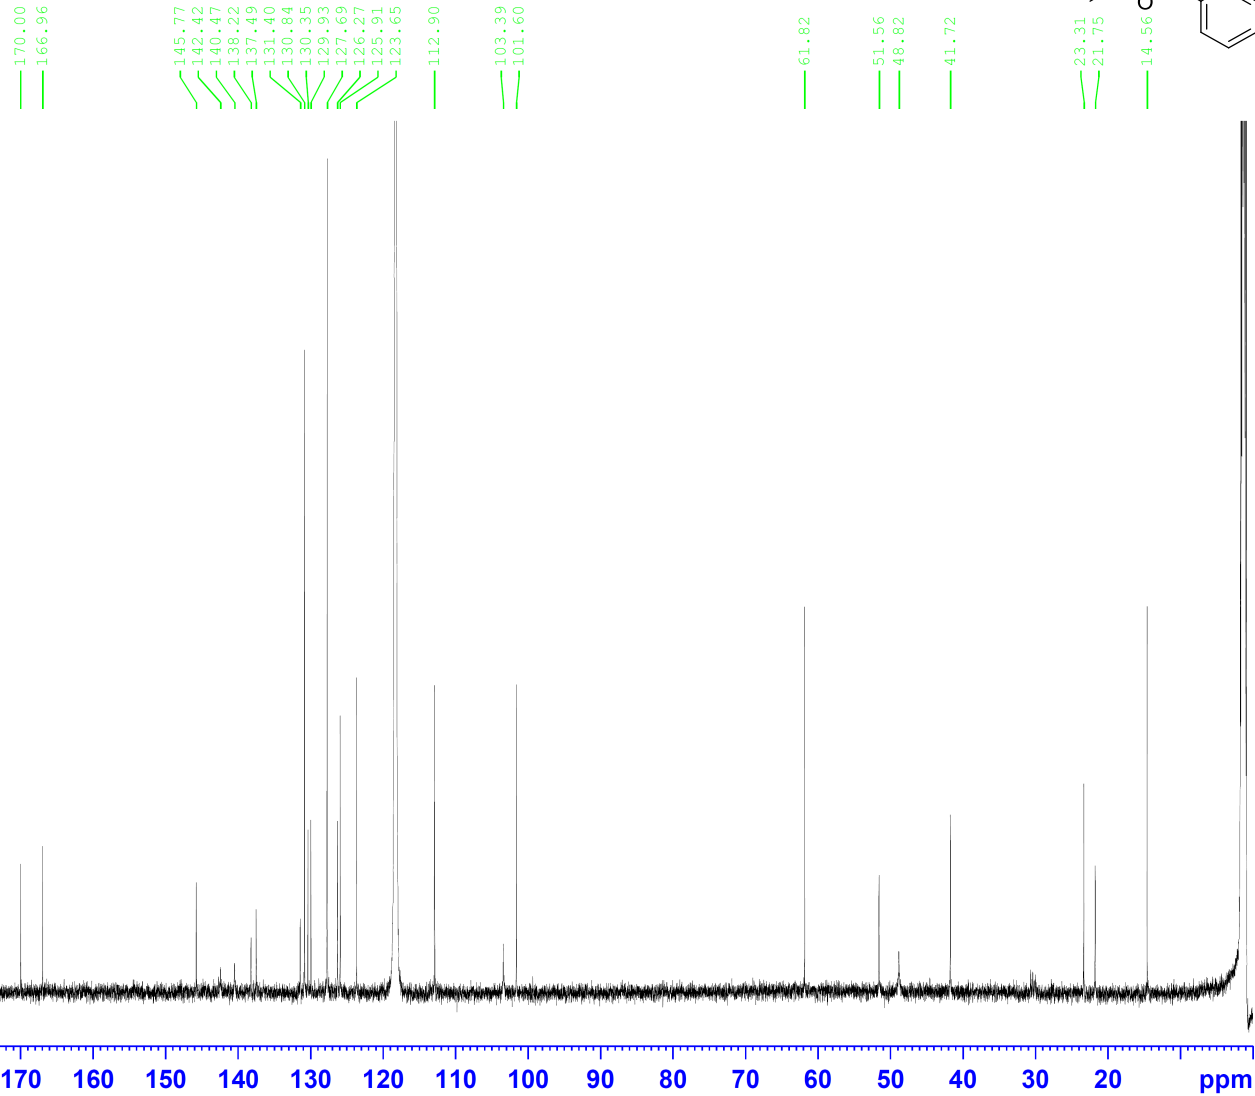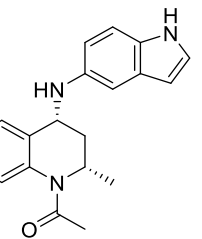

<sup>1</sup>H NMR 4-[(2*S*,4*R*)-1-acetyl-4-[(1*H*-indol-5-yl)amino]-2-methyl-1,2,3,4-tetrahydroquinolin-6-yl]benzoic acid (**13**)

Current Data Parameters  
NAME Proton  
EXPNO 1  
PROCNO 1

F2 - Acquisition Parameters  
Date\_ 20210802  
Time\_ 17.26 h  
INSTRUM avg400  
PROBHD Z108618\_0816 (  
PULPROG zg60  
TD 65536  
SOLVENT MeOD  
NS 16  
DS 2  
SWH 8012.820 Hz  
FIDRES 0.244532 Hz  
AQ 4.0894465 sec  
RG 206.87  
DW 62.400 usec  
DE 6.50 usec  
TE 299.1 K  
D1 1.0000000 sec  
TD0 1  
SFO1 400.2024012 MHz  
NUC1 1H  
P1 14.00 usec  
PLWL 14.0000000 W

F2 - Processing parameters  
SI 32768  
SF 400.2000077 MHz  
WDW EM  
SSB 0  
LB 0.30 Hz  
GB 0  
PC 1.00

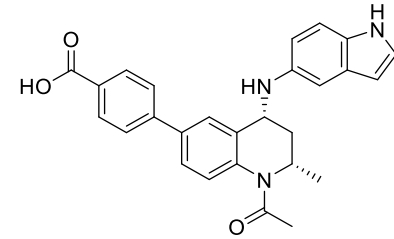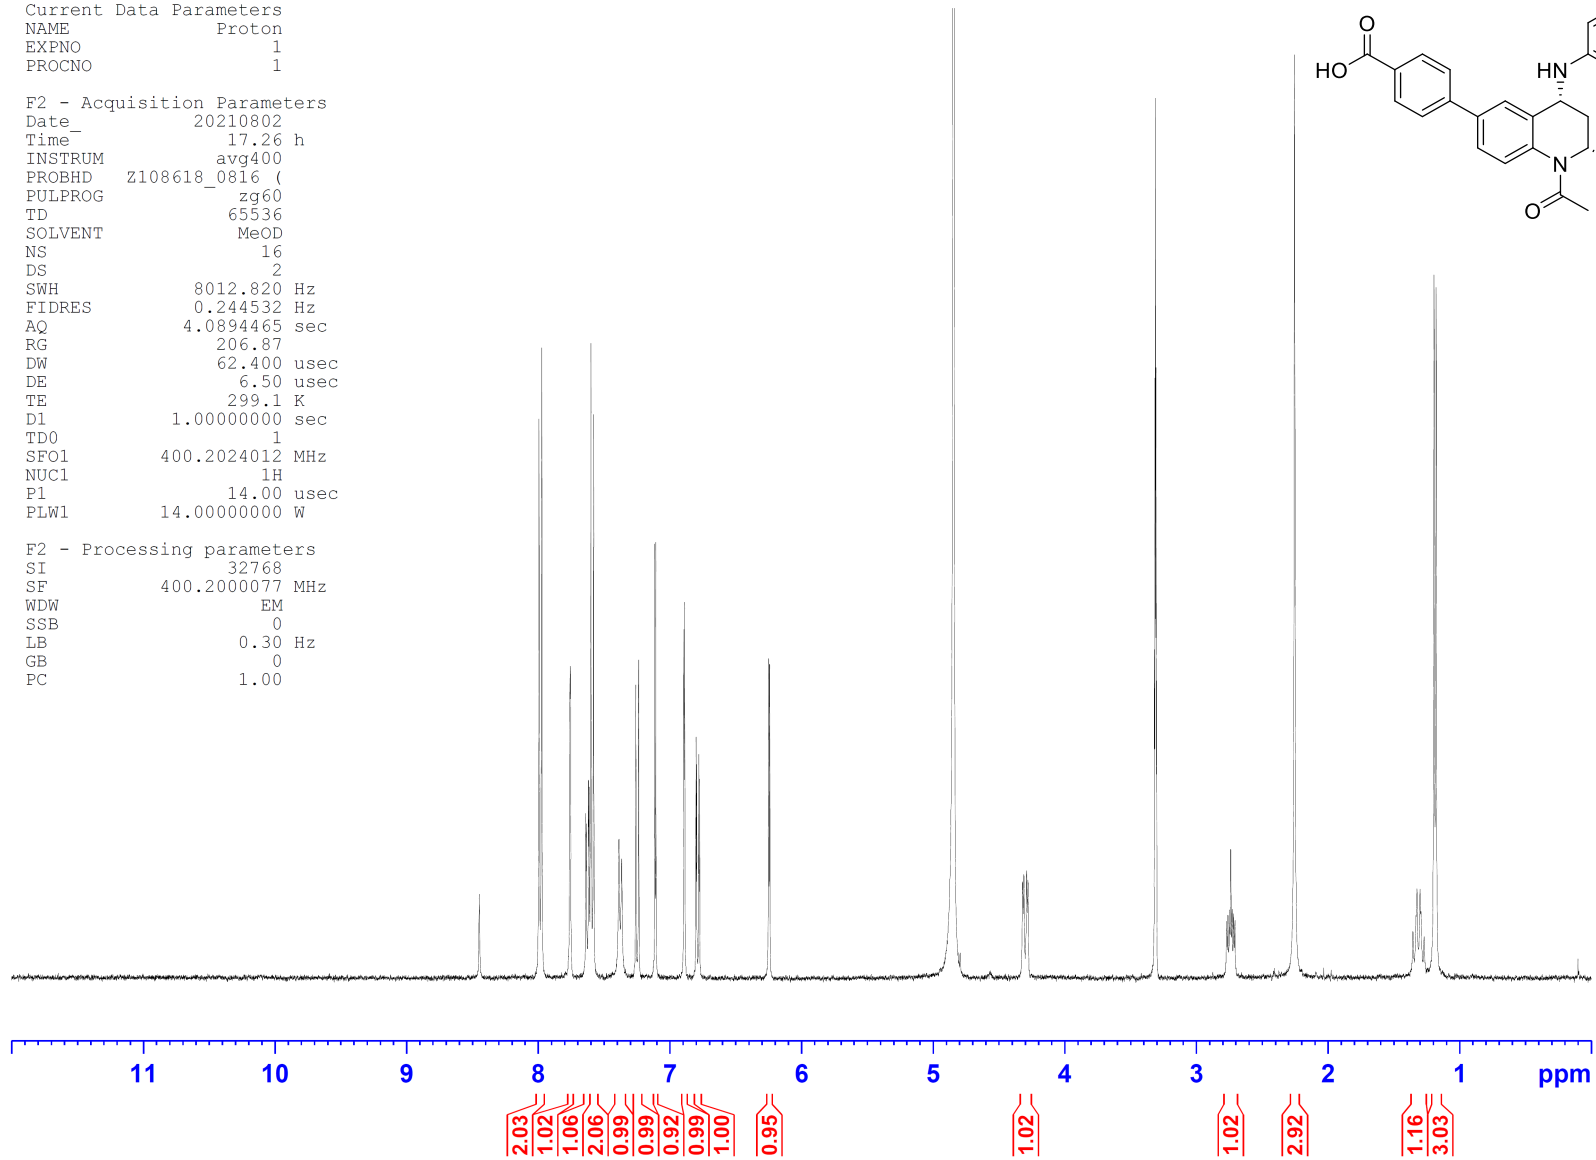

<sup>13</sup>C NMR 4-[(2*S*,4*R*)-1-acetyl-4-[(1*H*-indol-5-yl)amino]-2-methyl-1,2,3,4-tetrahydroquinolin-6-yl]benzoic acid (**13**)

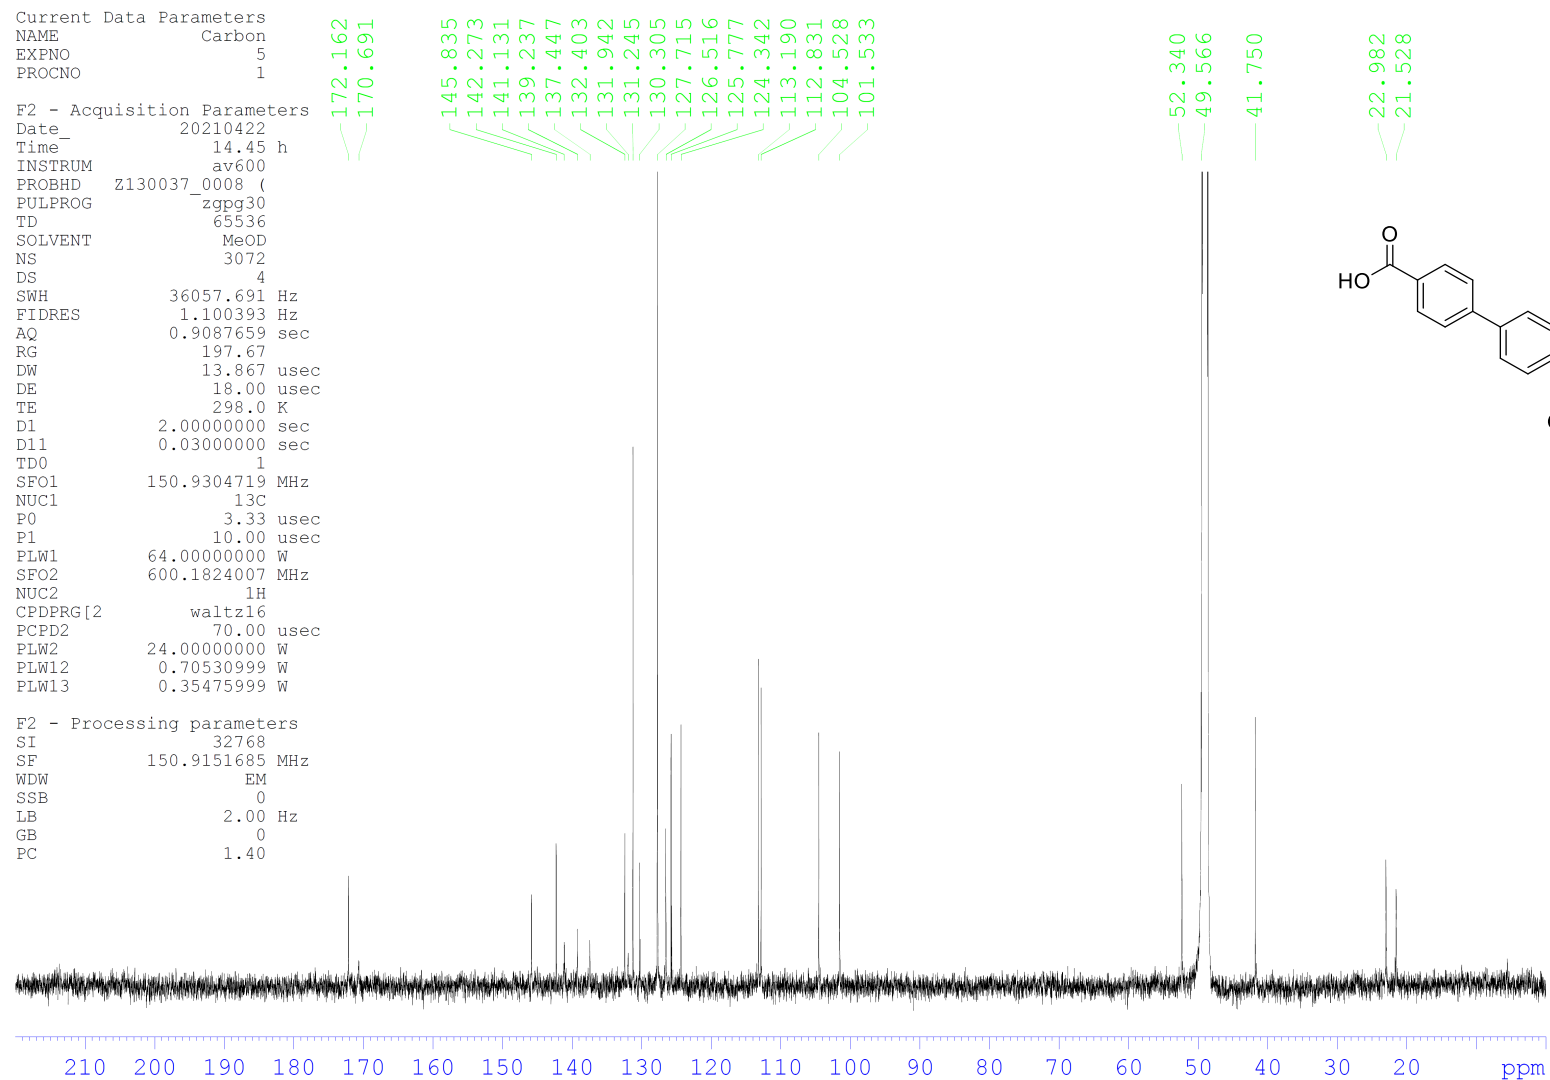

<sup>1</sup>H NMR ethyl 4-((2*S*,4*R*)-1-acetyl-4-((1,3-benzothiazol-6-yl)amino)-2-methyl-1,2,3,4-tetrahydroquinolin-6-yl)benzoate (**21**)

Current Data Parameters  
 NAME Proton  
 EXPNO 1  
 PROCNO 1

F2 - Acquisition Parameters  
 Date\_ 20210316  
 Time\_ 23.22  
 INSTRUM avc500  
 PROBHD 5 mm CPDUL 13C  
 PULPROG zg30  
 TD 65536  
 SOLVENT CD3CN  
 NS 16  
 DS 4  
 SWH 10330.578 Hz  
 FIDRES 0.157632 Hz  
 AQ 3.1719425 sec  
 RG 3.56  
 DW 48.400 usec  
 DE 10.00 usec  
 TE 298.0 K  
 D1 1.00000000 sec  
 TD0 1

===== CHANNEL f1 =====  
 SFO1 500.3030896 MHz  
 NUC1 1H  
 P1 22.00 usec  
 PLW1 7.99830008 W

F2 - Processing parameters  
 SI 65536  
 SF 500.3000152 MHz  
 WDW EM  
 SSB 0  
 LB 0.30 Hz  
 GB 0  
 PC 1.00

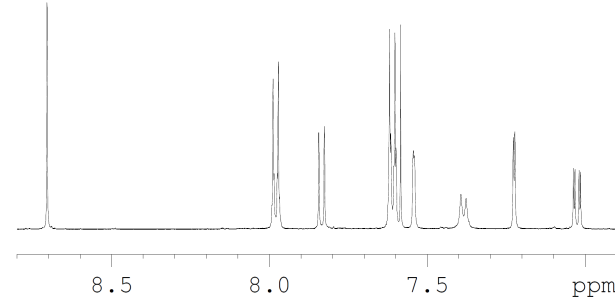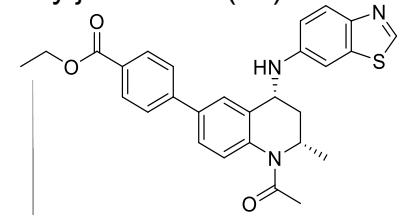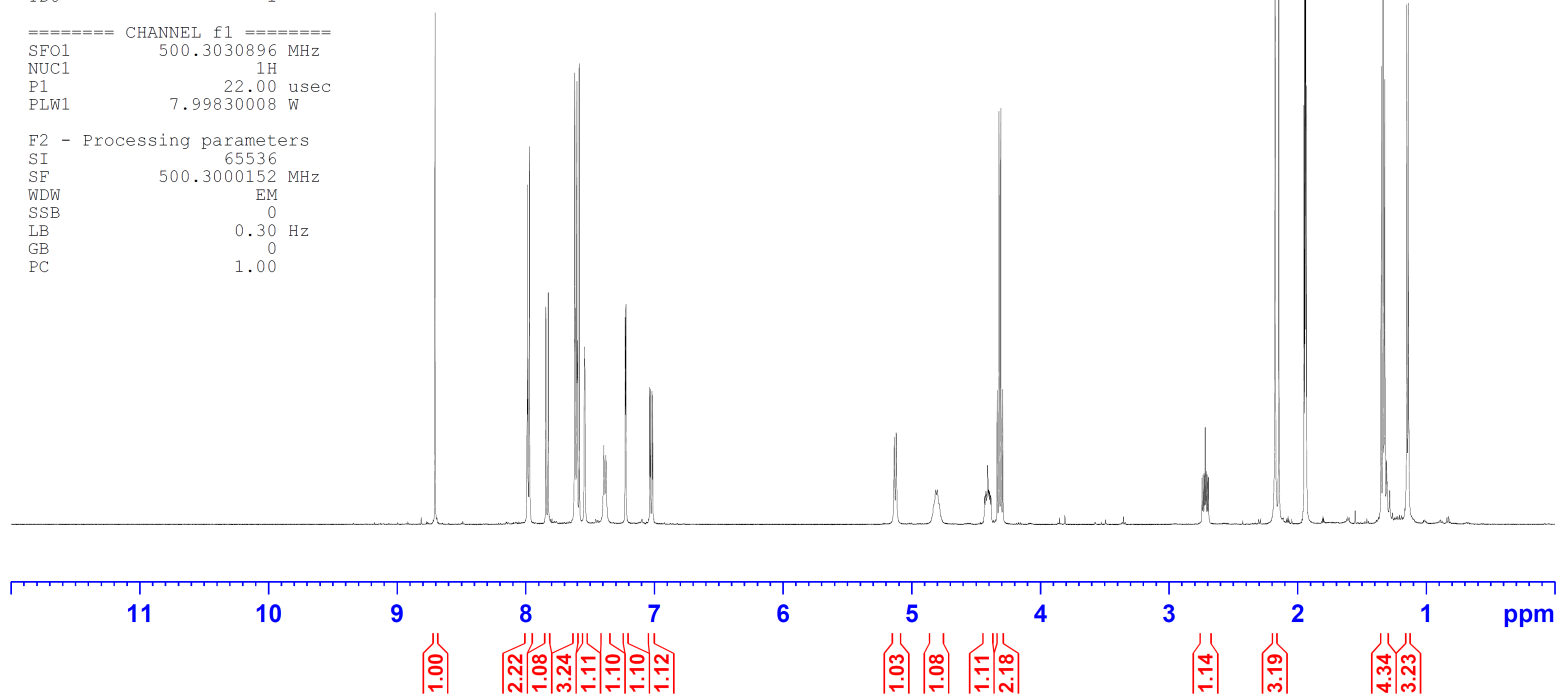

<sup>13</sup>C NMR ethyl 4-((2S,4R)1-acetyl-4-[(1,3-benzothiazol-6-yl)amino]-2-methyl-1,2,3,4-tetrahydroquinolin-6-yl)benzoate (**21**)

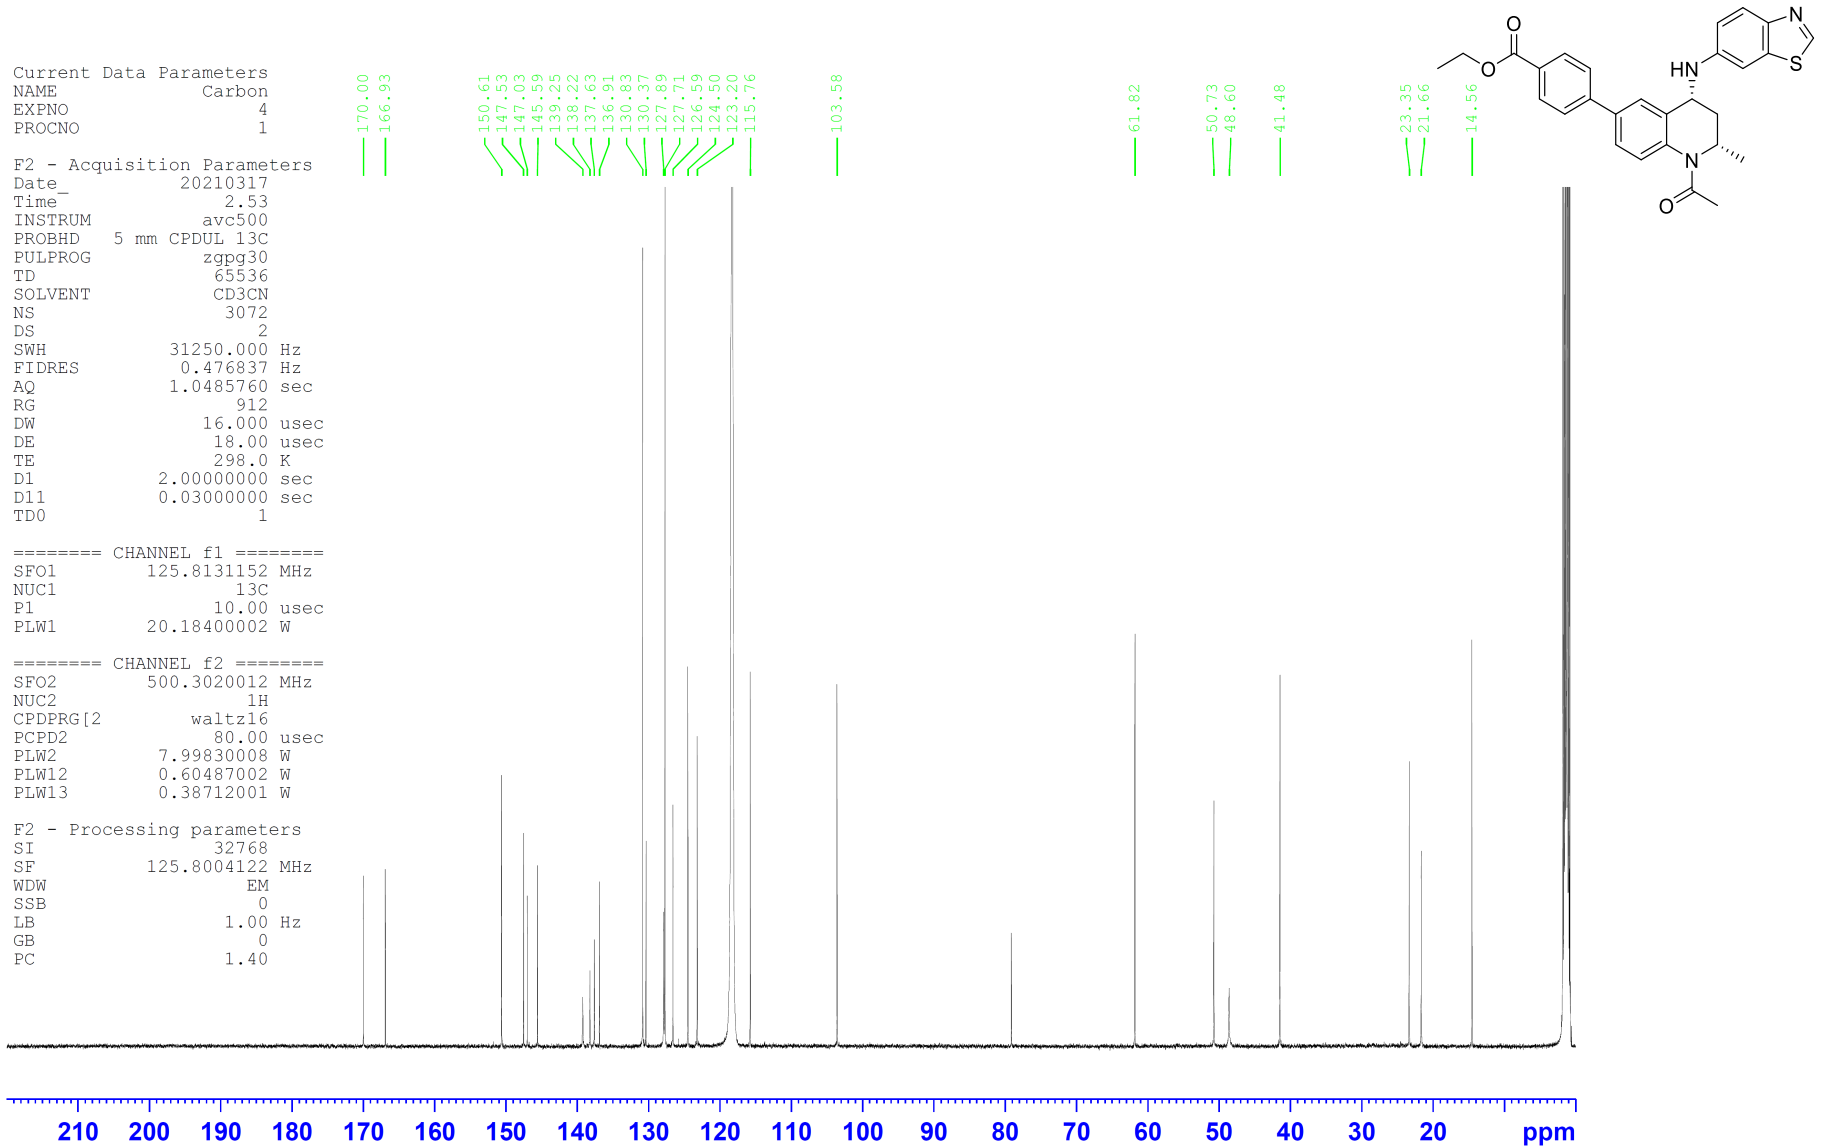

<sup>1</sup>H NMR 4-((2*S*,4*R*)1-acetyl-4-[(1,3-benzothiazol-6-yl)amino]-2-methyl-1,2,3,4-tetrahydroquinolin-6-yl)benzoic acid (**14**)

Current Data Parameters  
NAME Proton  
EXPNO 1  
PROCNO 1

F2 - Acquisition Parameters  
Date\_ 20210426  
Time\_ 10.58 h  
INSTRUM avh400  
PROBHD z108618\_0873 (  
PULPROG zg60  
TD 65536  
SOLVENT MeOD  
NS 16  
DS 2  
SWH 8012.820 Hz  
FIDRES 0.244532 Hz  
AQ 4.0894465 sec  
RG 88.17  
DW 62.400 usec  
DE 6.50 usec  
TE 299.3 K  
D1 1.00000000 sec  
TD0 1  
SFO1 400.1324008 MHz  
NUC1 1H  
P1 14.00 usec  
PLW1 14.36999989 W

F2 - Processing parameters  
SI 32768  
SF 400.1300078 MHz  
WDW EM  
SSB 0  
LB 0.30 Hz  
GB 0  
PC 1.00

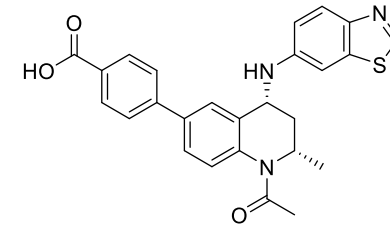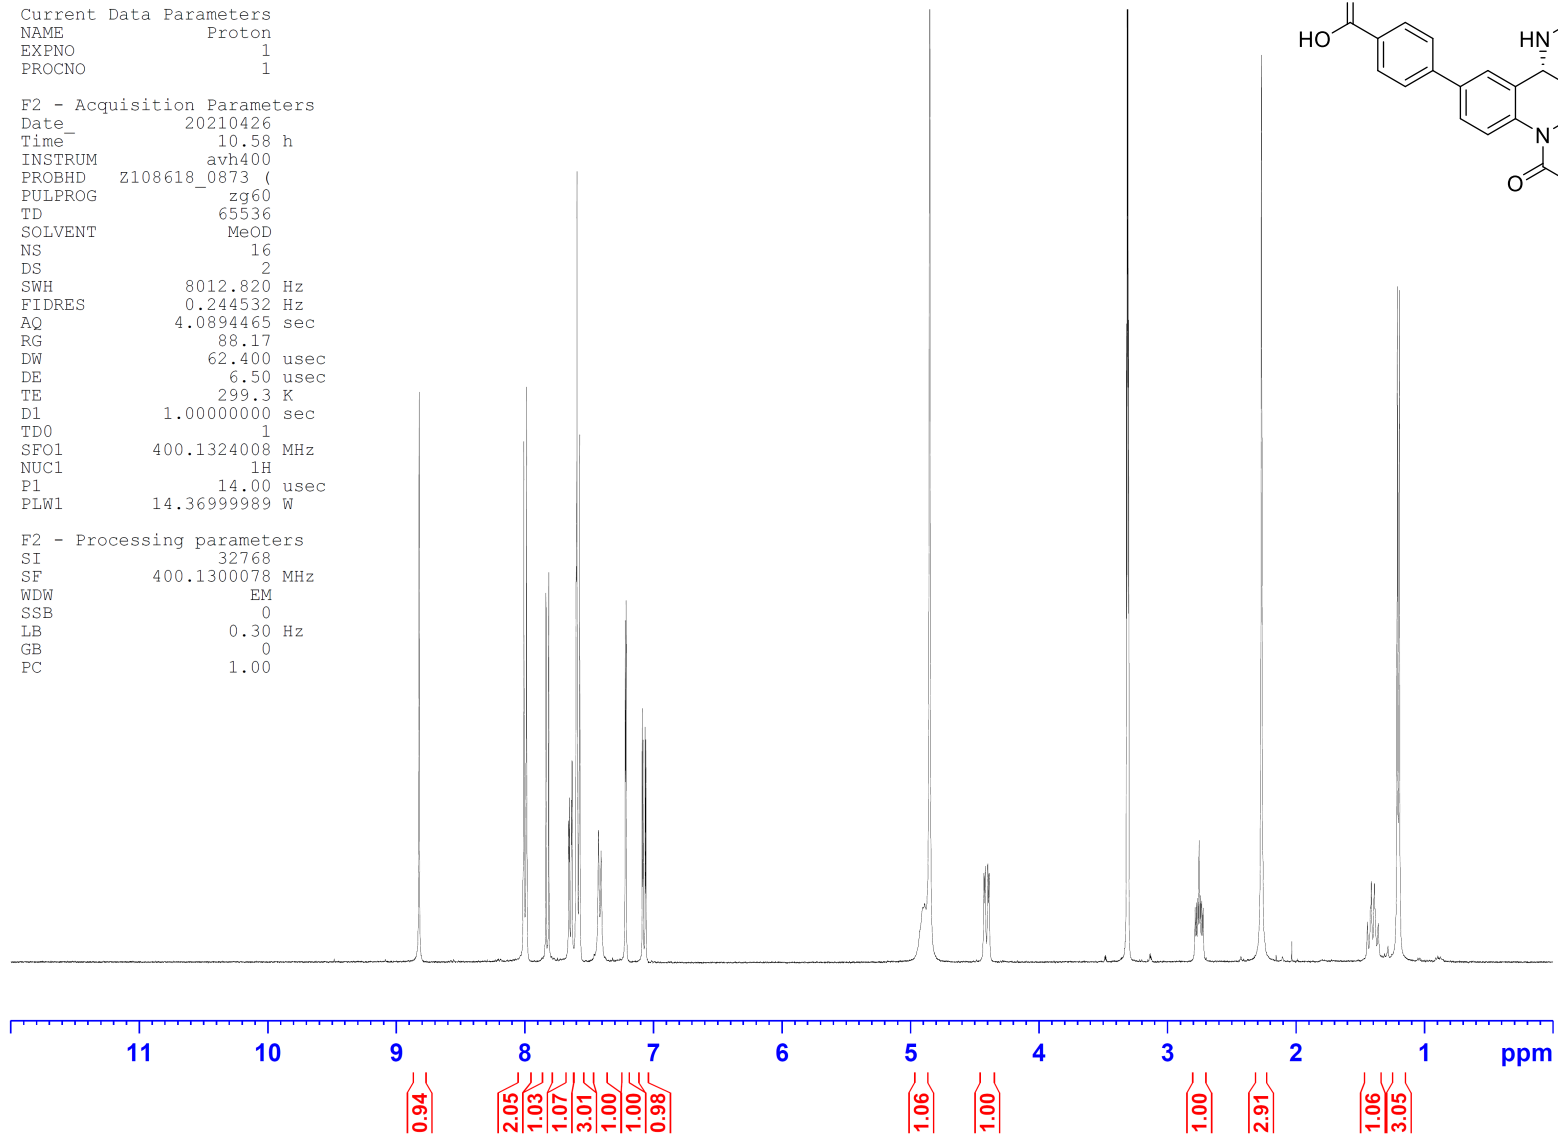

<sup>13</sup>C NMR 4-((2*S*,4*R*)1-acetyl-4-[(1,3-benzothiazol-6-yl)amino]-2-methyl-1,2,3,4-tetrahydroquinolin-6-yl)benzoic acid (**14**)

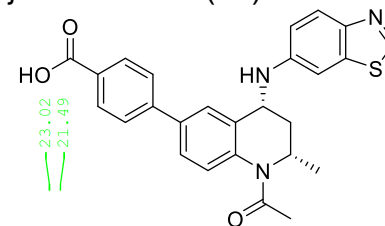

Current Data Parameters  
 NAME Carbon  
 EXPNO 5  
 PROCNO 1

F2 - Acquisition Parameters  
 Date\_ 20210502  
 Time\_ 1.34 h  
 INSTRUM Avance  
 PROBHD Z159656\_0020 (  
 PULPROG zgpg30  
 TD 65536  
 SOLVENT MeOD  
 NS 1024  
 DS 4  
 SWH 35714.285 Hz  
 FIDRES 1.089913 Hz  
 AQ 0.9175040 sec  
 RG 101  
 DW 14.000 usec  
 DE 18.00 usec  
 TE 298.0 K  
 D1 2.0000000 sec  
 D11 0.03000000 sec  
 TD0 1  
 SFO1 150.9908267 MHz  
 NUC1 13C  
 P0 3.33 usec  
 P1 10.00 usec  
 PLW1 41.91400146 W  
 SFO2 600.4224017 MHz  
 NUC2 1H  
 CPDPRG[2] waltz16  
 PCPD2 80.00 usec  
 PLW2 13.51200008 W  
 PLW12 0.30124050 W  
 PLW13 0.15098180 W

F2 - Processing parameters  
 SI 32768  
 SF 150.9755171 MHz  
 WDW EM  
 SSB 0  
 LB 1.00 Hz  
 GB 0  
 PC 1.40

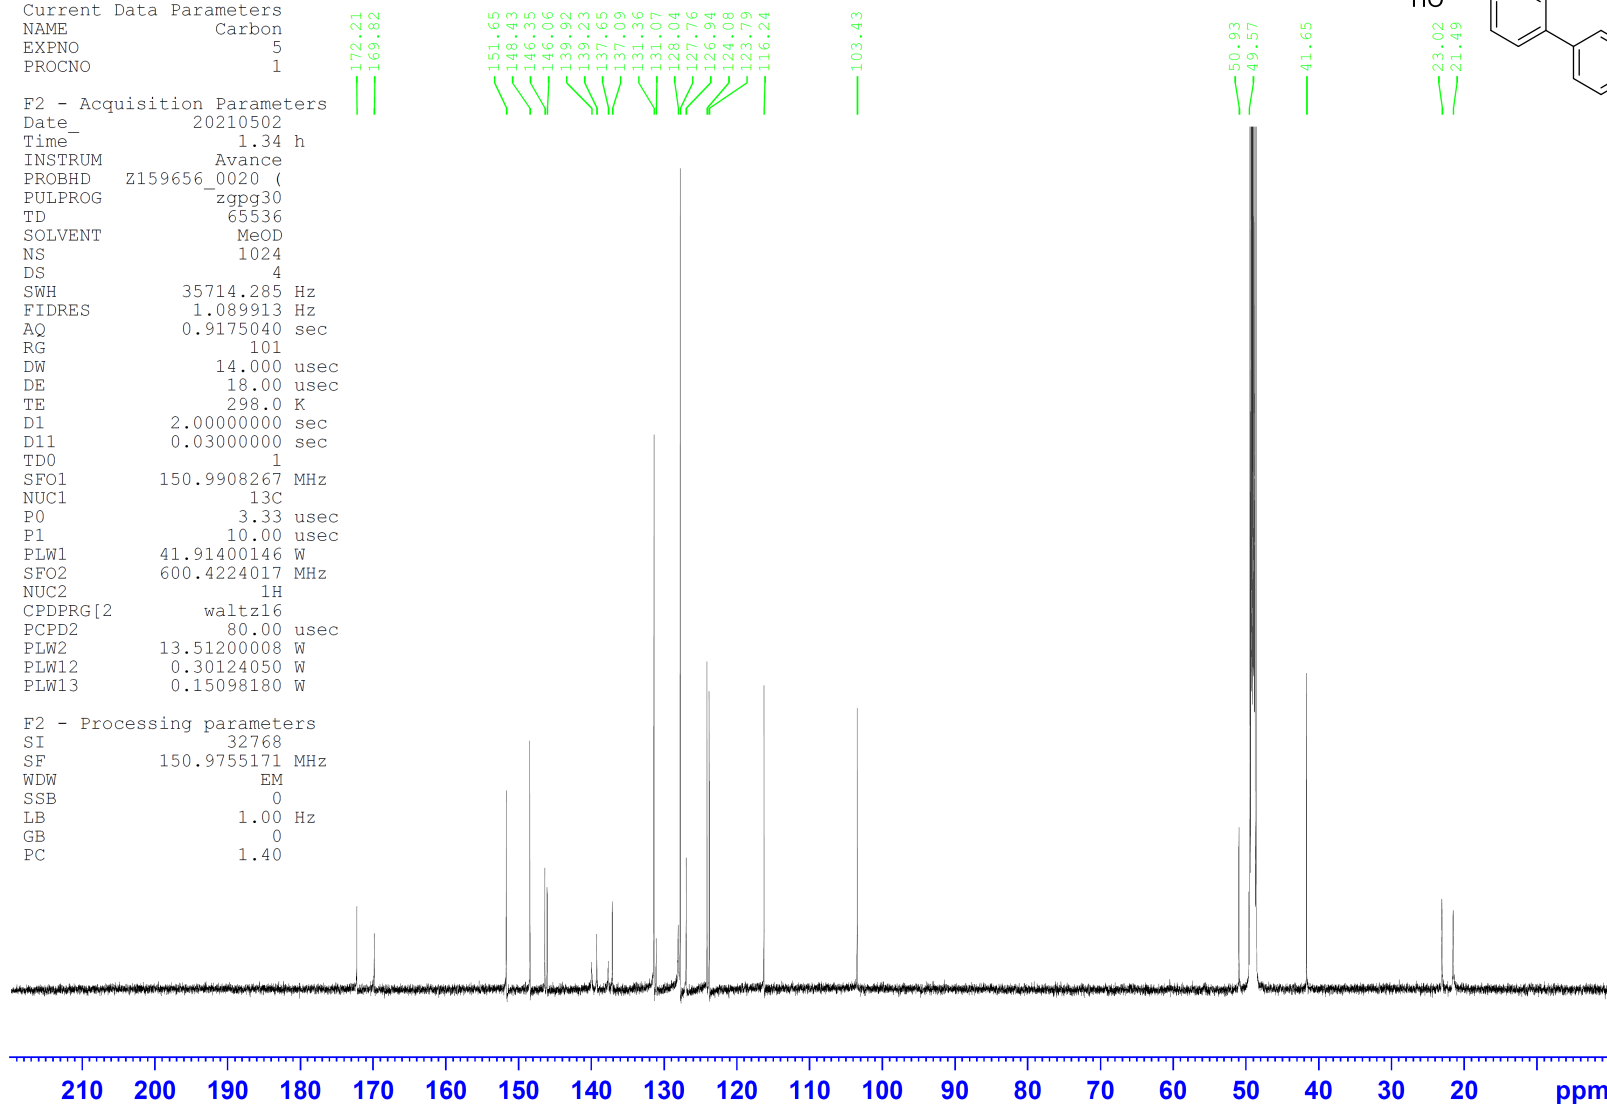



<sup>1</sup>H NMR ethyl 4-((2*S*,4*R*)-1-acetyl-2-methyl-4-[(quinolin-6-yl)amino]-1,2,3,4-tetrahydroquinolin-6-yl)benzoate (**22**)

Current Data Parameters  
NAME Proton  
EXPNO 1  
PROCNO 1

F2 - Acquisition Parameters  
Date\_ 20220425  
Time 10.40 h  
INSTRUM avg400  
PROBHD Z108618\_0816 (  
PULPROG zg60  
TD 65536  
SOLVENT CD3CN  
NS 16  
DS 2  
SWH 8012.820 Hz  
FIDRES 0.244532 Hz  
AQ 4.0894465 sec  
RG 91.39  
DW 62.400 usec  
DE 6.50 usec  
TE 298.0 K  
D1 1.00000000 sec  
TD0 1  
SFO1 400.2024012 MHz  
NUC1 1H  
P1 14.00 usec  
PLW1 14.00000000 W

F2 - Processing parameters  
SI 32768  
SF 400.2000113 MHz  
WDW EM  
SSB 0  
LB 0.30 Hz  
GB 0  
PC 1.00

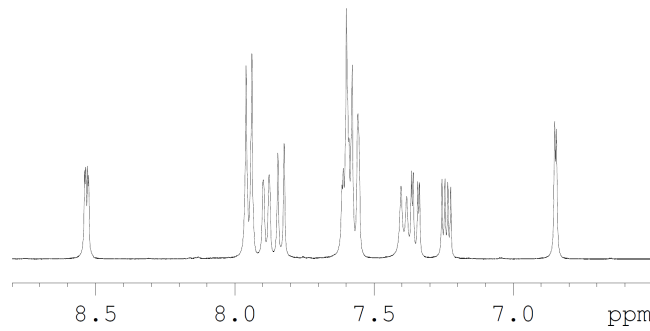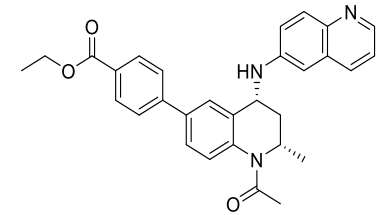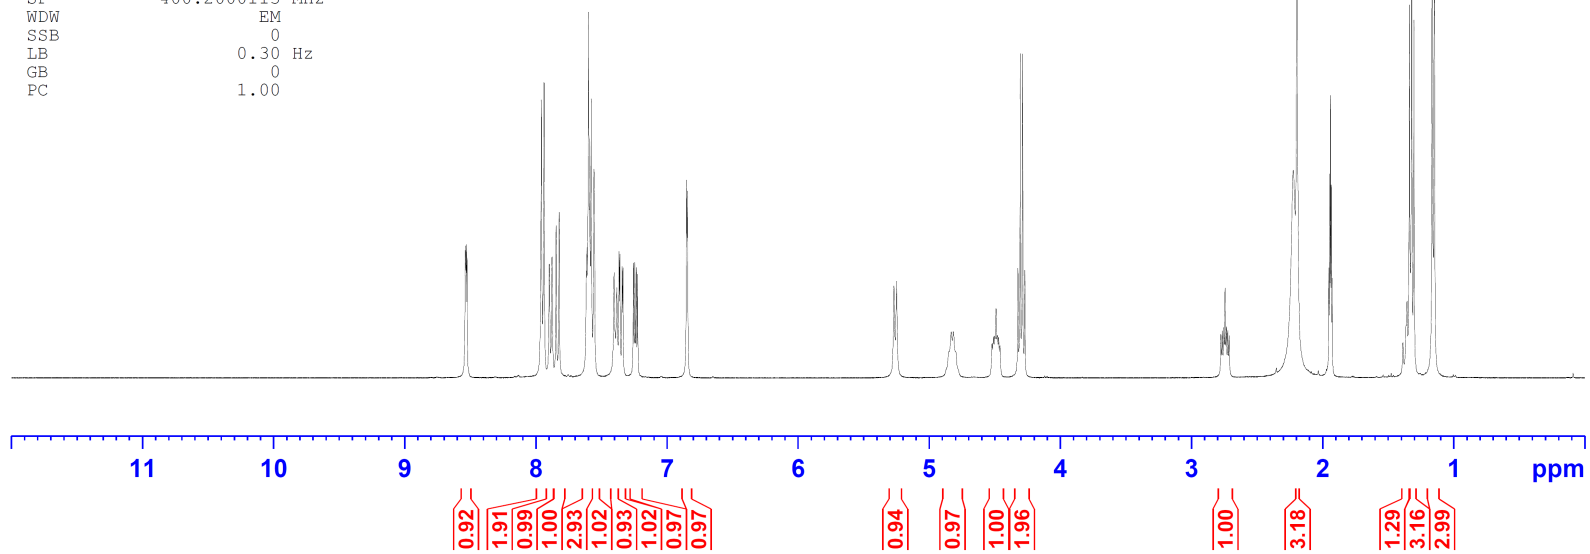

<sup>13</sup>C NMR ethyl 4-((2*S*,4*R*)-1-acetyl-2-methyl-4-[(quinolin-6-yl)amino]-1,2,3,4-tetrahydroquinolin-6-yl)benzoate (**22**)

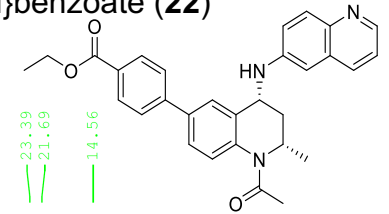

Current Data Parameters  
 NAME Carbon  
 EXPNO 5  
 PROCNO 1

F2 - Acquisition Parameters  
 Date\_ 20220426  
 Time 5.31 h  
 INSTRUM Avance  
 PROBHD Z159656\_0020 (  
 PULPROG zgpg30  
 TD 65536  
 SOLVENT CD3CN  
 NS 1024  
 DS 4  
 SWH 35714.285 Hz  
 FIDRES 1.089913 Hz  
 AQ 0.9175040 sec  
 RG 101  
 DW 14.000 usec  
 DE 18.000 usec  
 TE 298.0 K  
 D1 2.00000000 sec  
 D11 0.03000000 sec  
 TD0 1  
 SFO1 150.9923364 MHz  
 NUC1 13C  
 P0 3.33 usec  
 P1 10.00 usec  
 PLW1 41.91400146 W  
 SFO2 600.4224017 MHz  
 NUC2 1H  
 CPDPRG[2] waltz16  
 PCPD2 80.00 usec  
 PLW2 13.51200008 W  
 PLW12 0.30124050 W  
 PLW13 0.15098180 W

F2 - Processing parameters  
 SI 65536  
 SF 150.9755792 MHz  
 WDW EM  
 SSB 0  
 LB 1.00 Hz  
 GB 0  
 PC 1.40

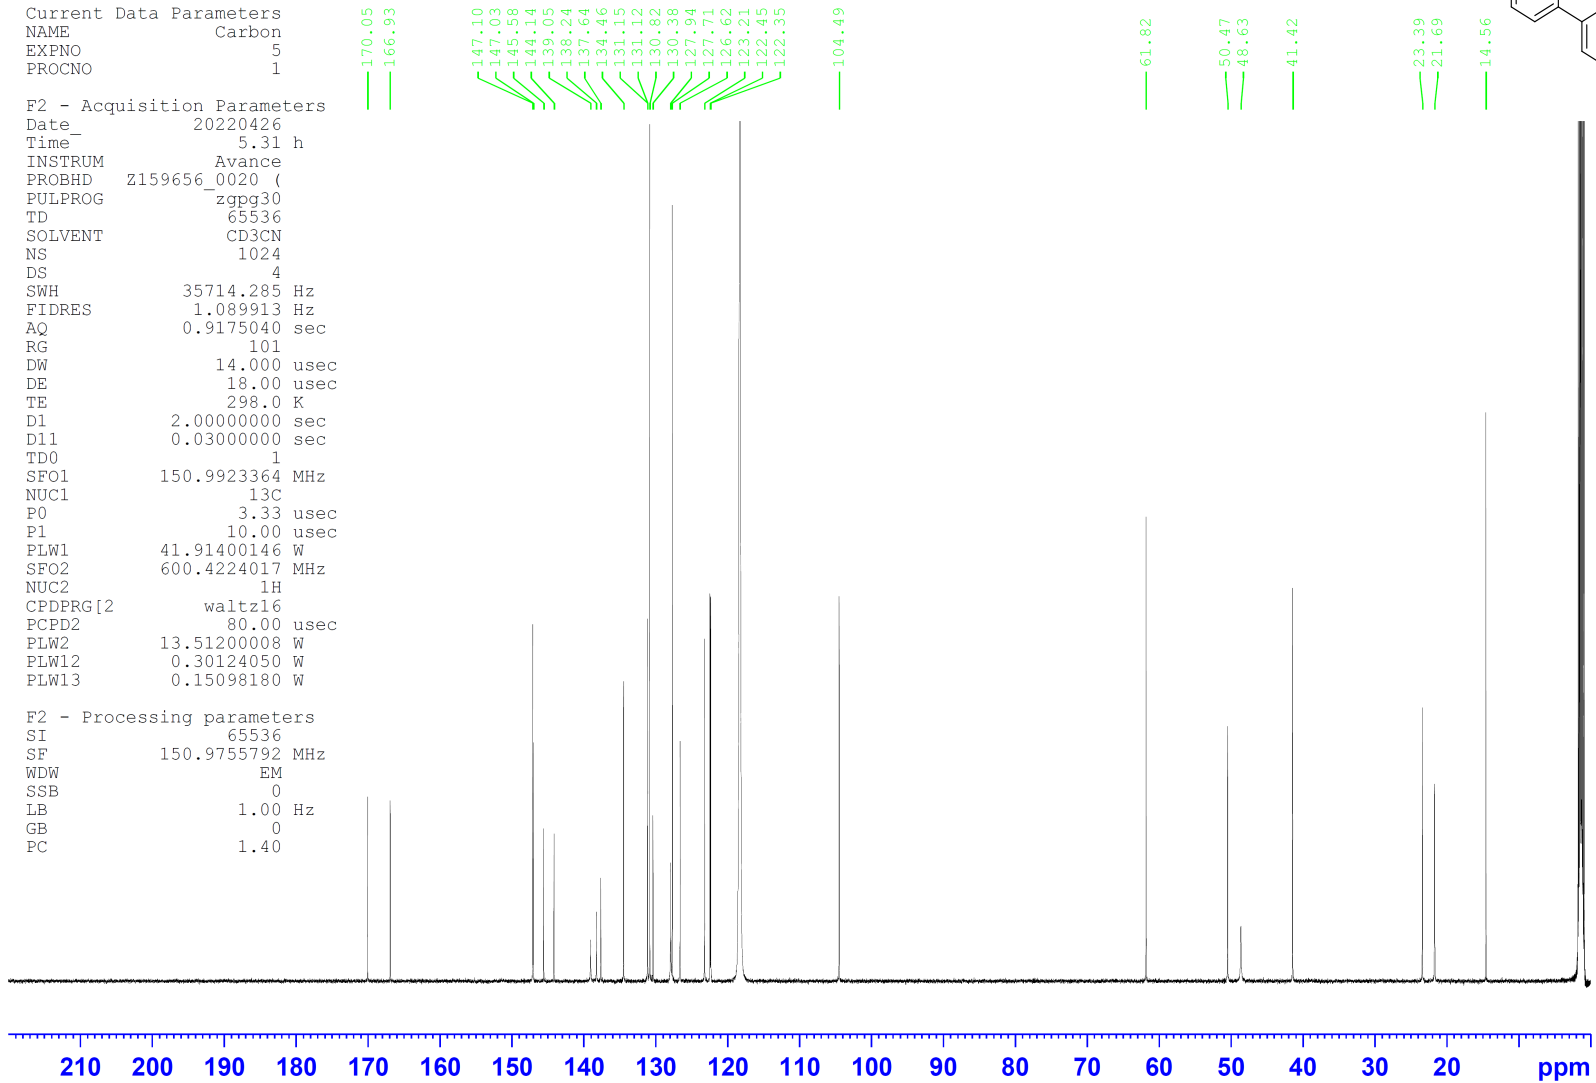

<sup>1</sup>H NMR 4-((2*S*,4*R*)-1-acetyl-2-methyl-4-[(quinolin-6-yl)amino]-1,2,3,4-tetrahydroquinolin-6-yl)benzoic acid (**15**)

Current Data Parameters  
NAME Proton  
EXPNO 1  
PROCNO 1

F2 - Acquisition Parameters  
Date\_ 20210805  
Time 2.05 h  
INSTRUM Avance  
PROBHD Z159656\_0020 (   
PULPROG zg30  
TD 65536  
SOLVENT MeOD  
NS 16  
DS 2  
SWH 11904.762 Hz  
FIDRES 0.363304 Hz  
AQ 2.7525120 sec  
RG 101  
DW 42.000 usec  
DE 22.00 usec  
TE 298.0 K  
D1 1.00000000 sec  
TD0 1  
SF01 600.4230021 MHz  
NUC1 1H  
P0 4.00 usec  
P1 12.00 usec  
PLW1 13.51200008 W

F2 - Processing parameters  
SI 65536  
SF 600.4200115 MHz  
WDW EM  
SSB 0  
LB 0.30 Hz  
GB 0  
PC 1.00

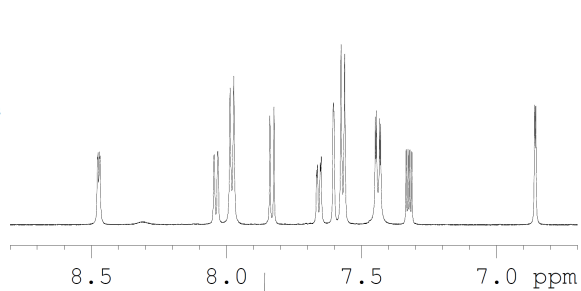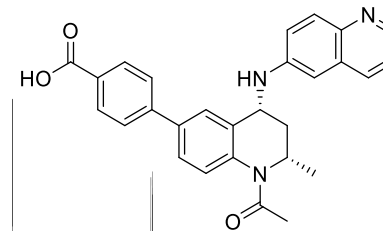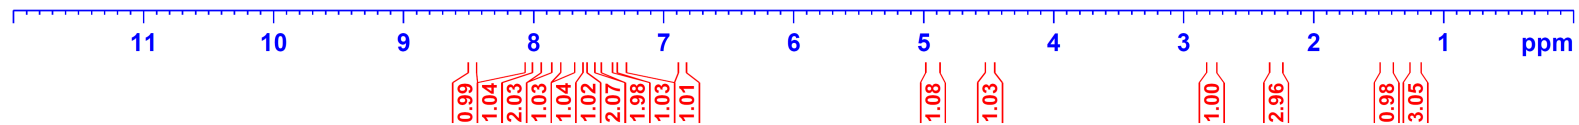

<sup>13</sup>C NMR 4-((2*S*,4*R*)-1-acetyl-2-methyl-4-[(quinolin-6-yl)amino]-1,2,3,4-tetrahydroquinolin-6-yl)benzoic acid (**15**)

Current Data Parameters  
 NAME Carbon  
 EXPNO 5  
 PROCNO 1

F2 - Acquisition Parameters  
 Date\_ 20210604  
 Time\_ 0.26 h  
 INSTRUM Avance  
 PROBHD Z159656\_0020 (  
 PULPROG zgpg30  
 TD 65536  
 SOLVENT MeOD  
 NS 3072  
 DS 4  
 SWH 35714.285 Hz  
 FIDRES 1.089913 Hz  
 AQ 0.9175040 sec  
 RG 101  
 DW 14.000 usec  
 DE 18.00 usec  
 TE 298.0 K  
 D1 2.00000000 sec  
 D11 0.03000000 sec  
 TD0 1  
 SFO1 150.9908267 MHz  
 NUC1 13C  
 P0 3.33 usec  
 P1 10.00 usec  
 PLW1 41.91400146 W  
 SFO2 600.4224017 MHz  
 NUC2 1H  
 CPDPRG[2] waltz16  
 PCPD2 80.00 usec  
 PLW2 13.51200008 W  
 PLW12 0.30124050 W  
 PLW13 0.15098180 W

F2 - Processing parameters  
 SI 32768  
 SF 150.9755183 MHz  
 WDW EM  
 SSB 0  
 LB 1.00 Hz  
 GB 0  
 PC 1.40

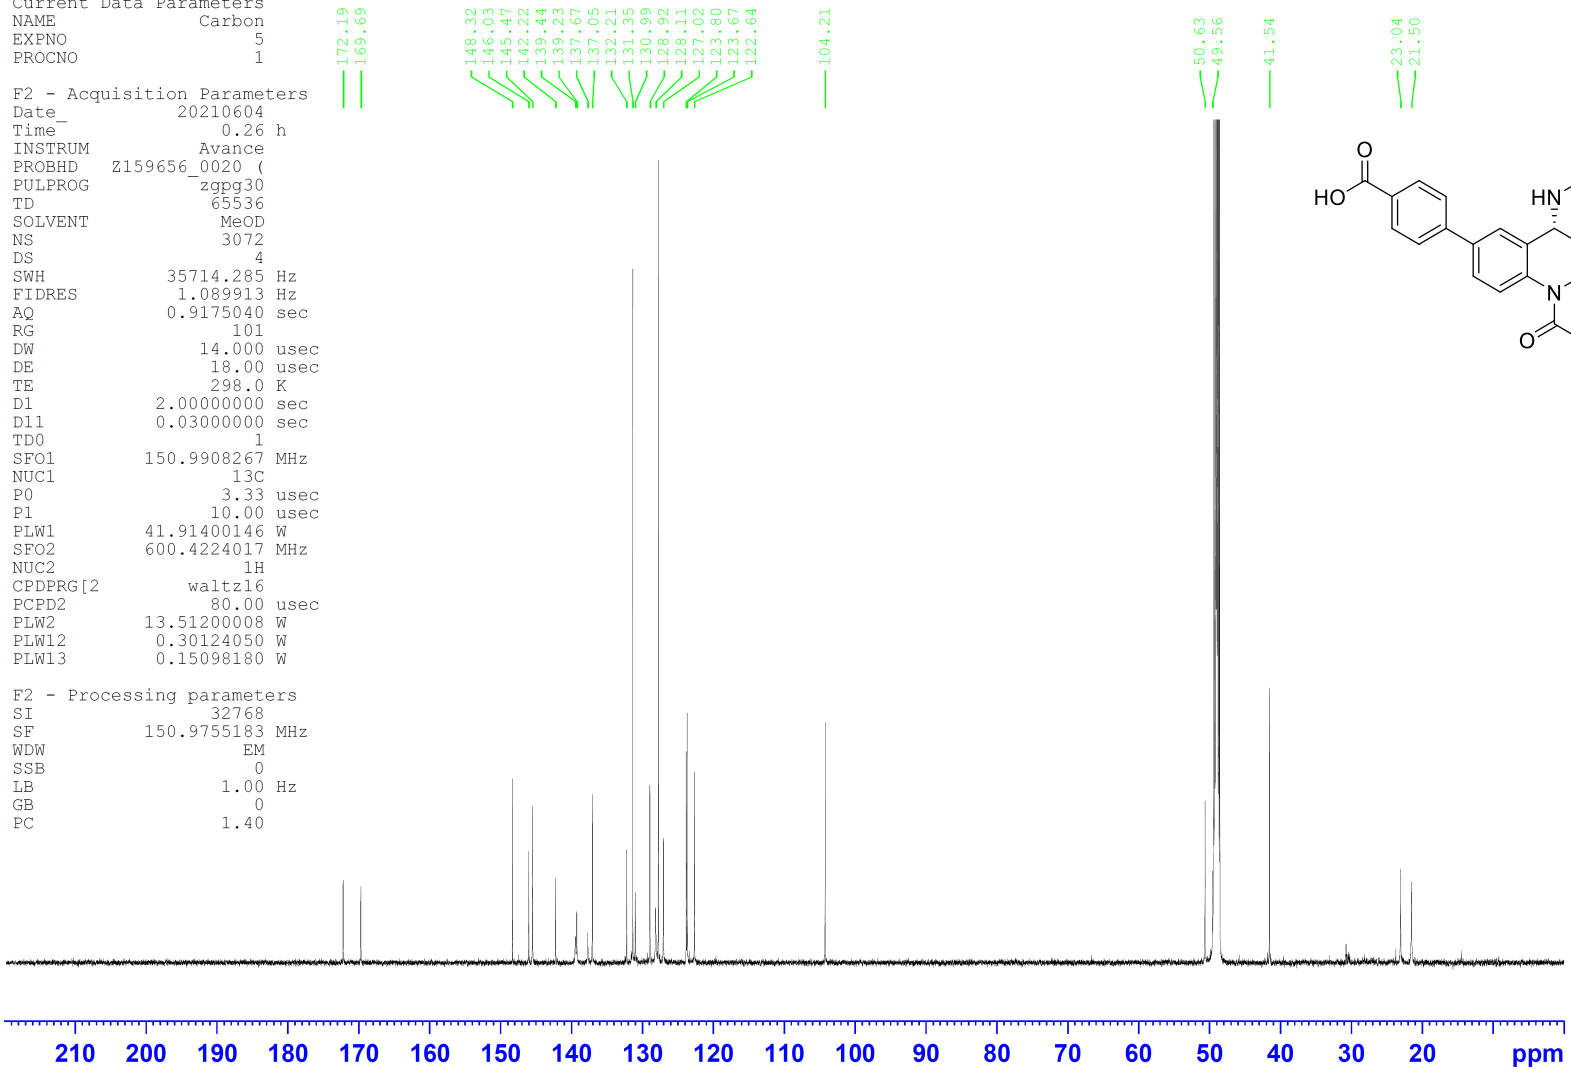

## HPLC traces of biologically tested compounds

### HPLC data 3-(3,5-dimethylisoxazol-4-yl)-5-(hydroxy(phenyl)methyl)phenol (1)

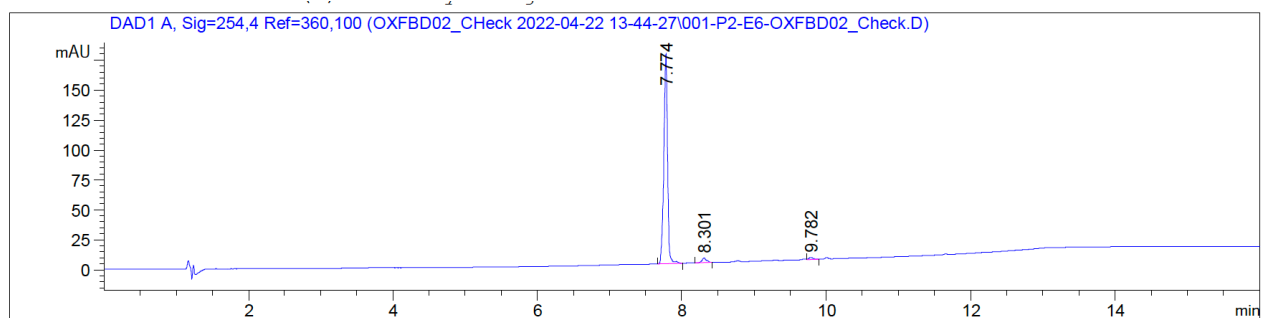

Signal 1: DAD1 A, Sig=254,4 Ref=360,100

| Peak # | RetTime [min] | Type | Width [min] | Area [mAU*s] | Height [mAU] | Area %  |
|--------|---------------|------|-------------|--------------|--------------|---------|
| 1      | 7.774         | BV R | 0.0527      | 625.93250    | 175.22585    | 96.2947 |
| 2      | 8.301         | BB   | 0.0620      | 16.89226     | 3.86322      | 2.5987  |
| 3      | 9.782         | VB   | 0.0614      | 7.19295      | 1.76944      | 1.1066  |

Totals : 650.01770 180.85850

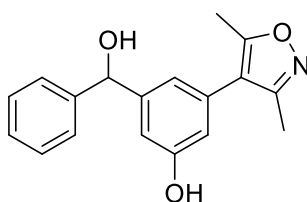

**OXFBD02 (1)**

# HPLC data 3-(3,5-dimethylisoxazol-4-yl)-5-(hydroxy(phenyl)methyl)phenyl acetate (2)

Acquisition Method Purity short run @254 nm  
Acquisition Date/Time 8/6/2021 7:37 pm  
Injection Volume 10  
Sample Name OXFBD03  
Sample Description  
Batch Description

OXFBD03 : Injection 1

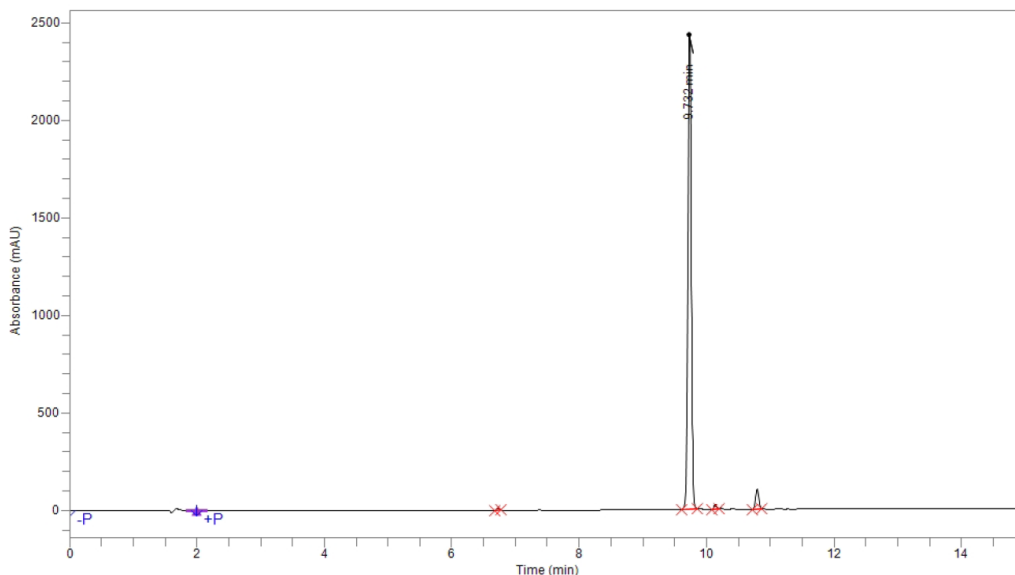

| Time         | Height      | Area        | Area % |
|--------------|-------------|-------------|--------|
| 6.721        | 9,489.6     | 27,170.4    | 0.28   |
| 9.732        | 2,437,733.8 | 9,113,876.6 | 95.41  |
| 10.139       | 21,669.9    | 65,660.8    | 0.69   |
| 10.795       | 103,878.7   | 345,973.9   | 3.62   |
| <b>Total</b> |             | 9,552,681.8 | 100.00 |

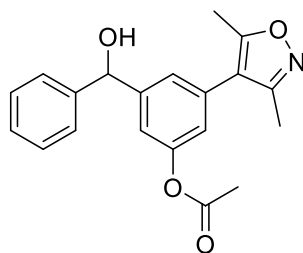

OXFBD03 (2)

HPLC data 3-(3,5-dimethyl-1,2-oxazol-4-yl)-5-[(4-fluorophenyl)(hydroxyl)methyl]phenol (**3**)

Acquisition Method Purity short run @254 nm  
 Acquisition Date/Time 8/9/2021 5:12 pm  
 Injection Volume 10  
 Sample Name CE\_fluoro\_254  
 Sample Description  
 Batch Description

CE\_fluoro\_254 : Injection 1

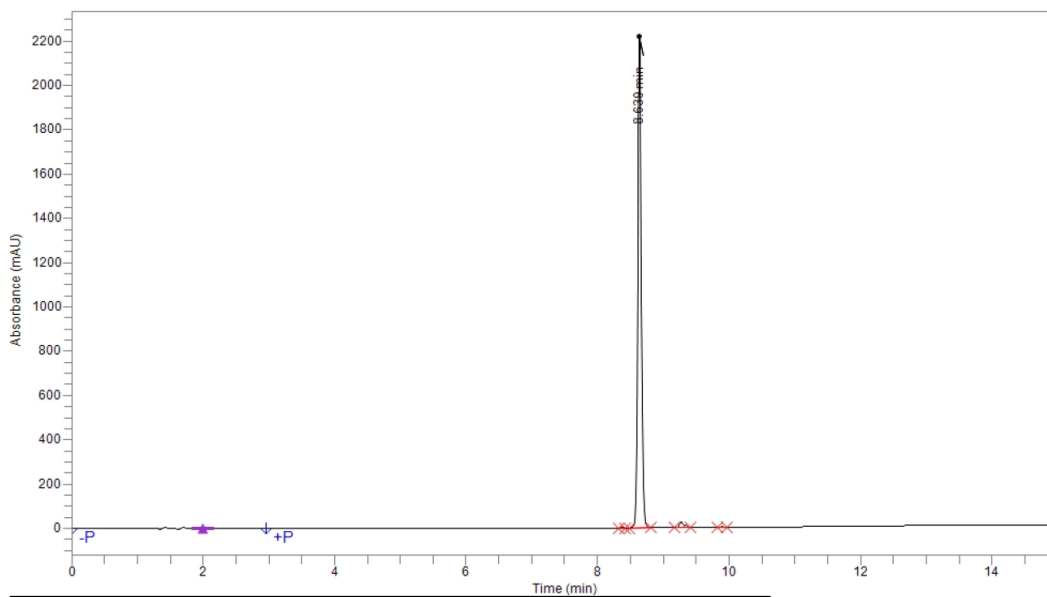

| Time         | Height      | Area        | Area % |
|--------------|-------------|-------------|--------|
| 8.374        | 896.2       | 2,655.0     | 0.03   |
| 8.639        | 2,223,007.8 | 8,851,577.2 | 98.46  |
| 9.276        | 24,663.8    | 91,640.9    | 1.02   |
| 9.341        | 10,442.9    | 30,140.9    | 0.34   |
| 9.895        | 3,974.7     | 14,103.1    | 0.16   |
| <b>Total</b> |             | 8,990,117.1 | 100.00 |

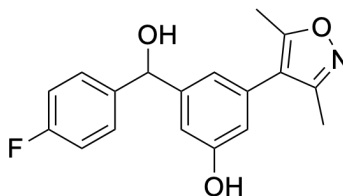

**3**

HPLC data 3-(3,5-dimethyl-1,2-oxazol-4-yl)-5-[hydroxy(pyridine-3-yl)methyl]phenol (4)

Acquisition Method Purity short run @254 nm  
 Acquisition Date/Time 8/6/2021 8:12 pm  
 Injection Volume 10  
 Sample Name DM-A-85  
 Sample Description  
 Batch Description

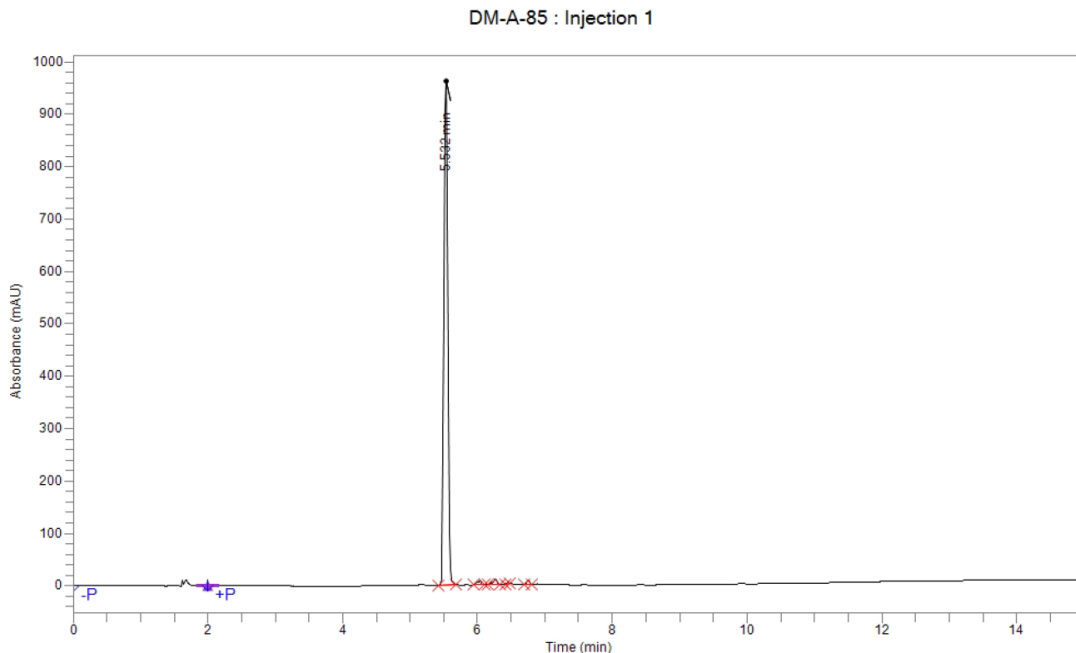

| Time         | Height    | Area        | Area % |
|--------------|-----------|-------------|--------|
| 5.532        | 963,220.0 | 3,610,657.4 | 97.19  |
| 6.038        | 7,415.8   | 34,196.0    | 0.92   |
| 6.211        | 4,415.7   | 10,973.6    | 0.30   |
| 6.270        | 11,588.8  | 36,623.3    | 0.99   |
| 6.457        | 1,255.1   | 2,546.7     | 0.07   |
| 6.754        | 7,338.2   | 19,876.8    | 0.54   |
| <b>Total</b> |           | 3,714,873.8 | 100.00 |

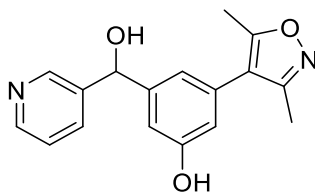

**OXFBD04 (4)**



HPLC data 4-{(2*S*,4*R*)-1-acetyl-4-[(1-benzothiophen-6-yl)amino]-2-methyl-1,2,3,4-tetrahydroquinolin-6-yl}benzoic acid (**9**)

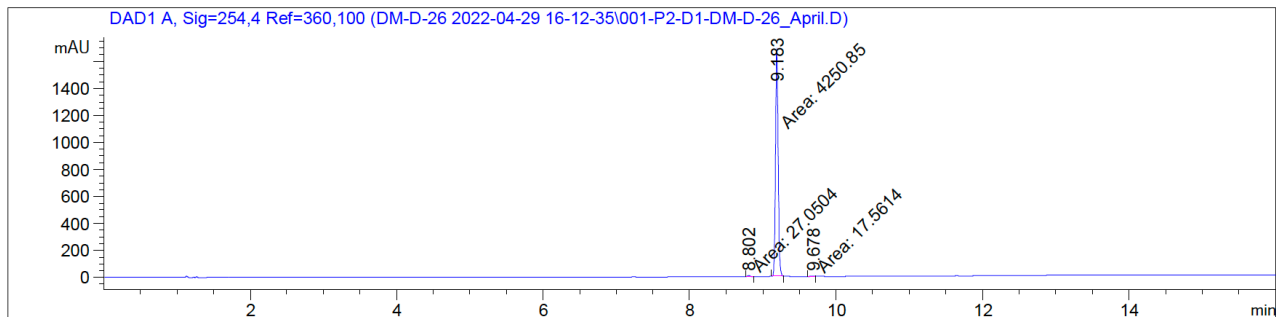

| Peak # | RetTime [min] | Type | Width [min] | Area [mAU*s] | Height [mAU] | Area %  |
|--------|---------------|------|-------------|--------------|--------------|---------|
| 1      | 8.802         | MM   | 0.0539      | 27.05043     | 8.36767      | 0.6297  |
| 2      | 9.183         | MM   | 0.0420      | 4250.85156   | 1687.90247   | 98.9614 |
| 3      | 9.678         | MM   | 0.0629      | 17.56145     | 4.65264      | 0.4088  |

Totals : 4295.46344 1700.92278

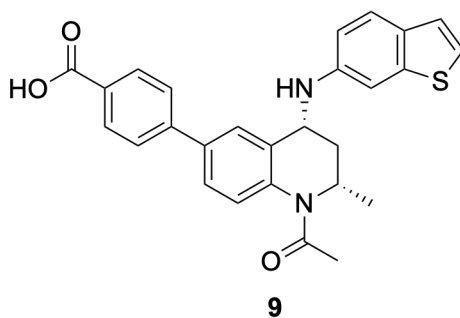

HPLC data 4- $\{(2R,4S)\}$ -1-acetyl-4-[(1-benzothiophen-6-yl)amino]-2-methyl-1,2,3,4-tetrahydroquinolin-6-yl}benzoic acid (**10**)

Acquisition Method Purity short run @254 nm  
Acquisition Date/Time 7/29/2021 1:12 pm  
Injection Volume 10  
Sample Name DM-C-36\_254  
Sample Description  
Batch Description

DM-C-36\_254 : Injection 1

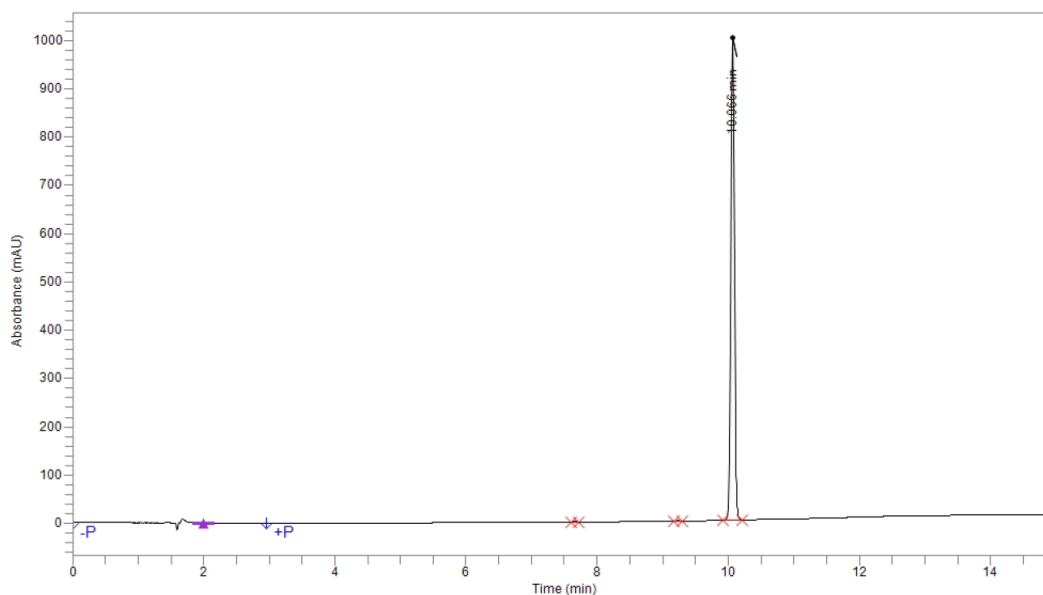

| Time         | Height      | Area        | Area % |
|--------------|-------------|-------------|--------|
| 7.660        | 987.6       | 3,444.0     | 0.09   |
| 9.239        | 1,339.7     | 4,672.3     | 0.13   |
| 10.066       | 1,001,222.4 | 3,644,262.2 | 99.78  |
| <b>Total</b> |             | 3,652,378.5 | 100.00 |

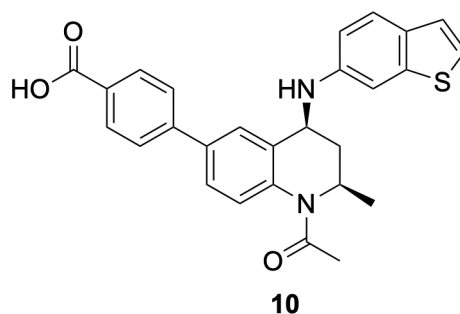

# HPLC 4-((2*S*,4*R*)-1-acetyl-4-[(1-benzofuran-6-yl)amino]-2-methyl-1,2,3,4-tetrahydroquinolin-6-yl)benzoic acid (**11**)

Acquisition Method Purity short run @254 nm  
Acquisition Date/Time 8/2/2021 11:27 am  
Injection Volume 20  
Sample Name DM-C-04\_254  
Sample Description  
Batch Description

DM-C-04\_254 : Injection 1

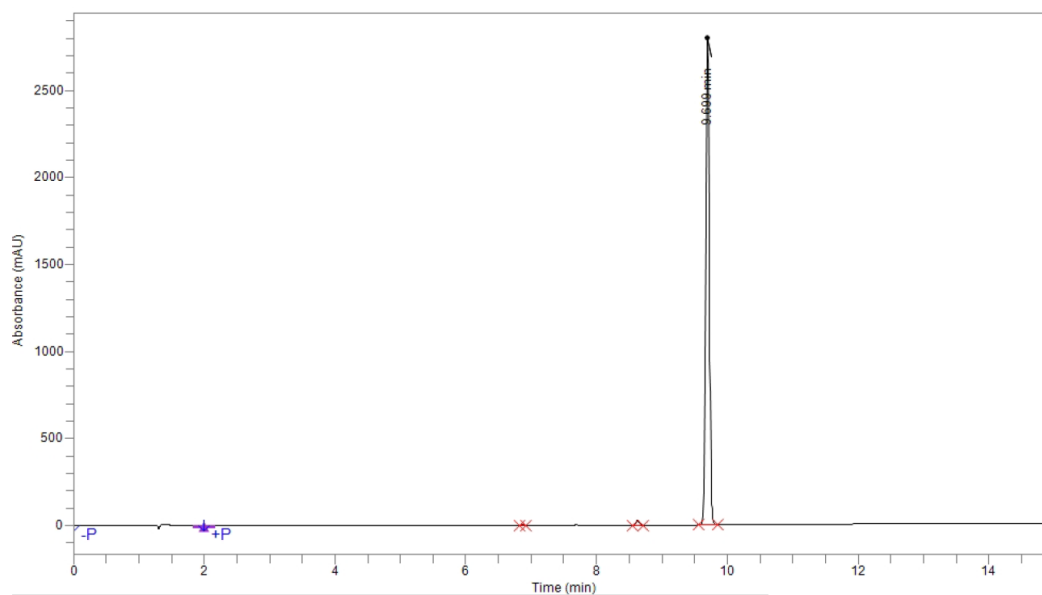

| Time         | Height      | Area         | Area % |
|--------------|-------------|--------------|--------|
| 6.873        | 4,367.9     | 12,075.5     | 0.12   |
| 8.629        | 26,999.4    | 106,309.6    | 1.02   |
| 9.699        | 2,805,447.7 | 10,312,883.1 | 98.87  |
| <b>Total</b> |             | 10,431,268.1 | 100.00 |

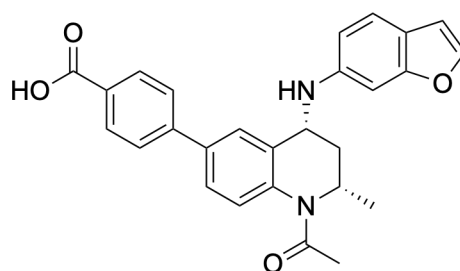

**11**

HPLC data 4-((2*S*,4*R*)-1-acetyl-4-[(1-benzothiophen-5-yl)amino]-2-methyl-1,2,3,4-tetrahydroquinolin-6-yl)benzoic acid (**12**)

Acquisition Method Purity short run @254 nm  
Acquisition Date/Time 7/29/2021 12:36 pm  
Injection Volume 10  
Sample Name DM-C-35\_254  
Sample Description  
Batch Description

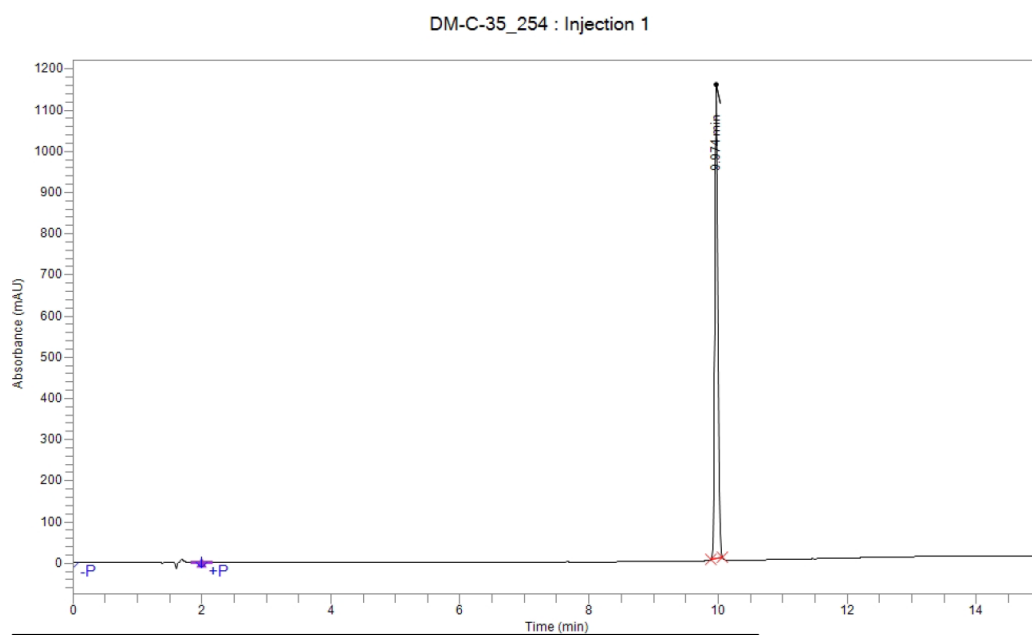

| Time         | Height      | Area        | Area % |
|--------------|-------------|-------------|--------|
| 9.974        | 1,150,590.9 | 4,025,535.8 | 100.00 |
| <b>Total</b> |             | 4,025,535.8 | 100.00 |

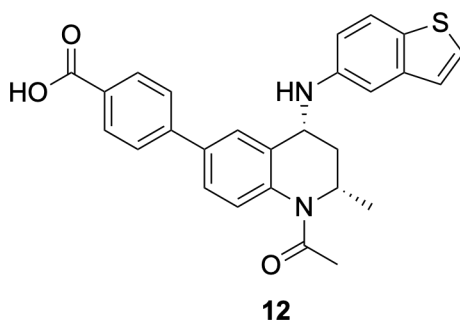

# HPLC data 4-[(2*S*,4*R*)-1-acetyl-4-[(1*H*-indol-5-yl)amino]-2-methyl-1,2,3,4-tetrahydroquinolin-6-yl]benzoic acid (**13**)

Acquisition Method Purity short run @254 nm  
Acquisition Date/Time 4/16/2021 12:29 pm  
Injection Volume 30  
Sample Name DM-C-14\_RPCoI\_TFA\_254  
Sample Description  
Batch Description

DM-C-14\_RPCoI\_TFA\_254 : Injection 1

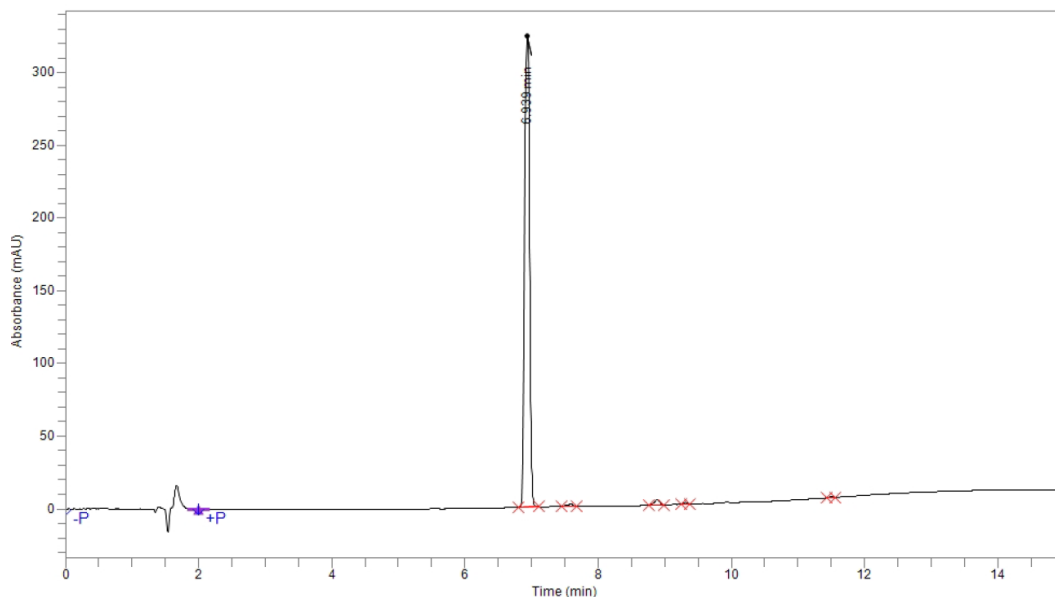

| Time         | Height    | Area        | Area % |
|--------------|-----------|-------------|--------|
| 6.939        | 324,479.4 | 1,697,874.4 | 97.93  |
| 7.591        | 1,563.8   | 9,865.4     | 0.57   |
| 8.894        | 3,554.7   | 19,742.7    | 1.14   |
| 9.313        | 1,079.0   | 3,916.4     | 0.23   |
| 11.498       | 623.0     | 2,302.2     | 0.13   |
| <b>Total</b> |           | 1,733,701.1 | 100.00 |

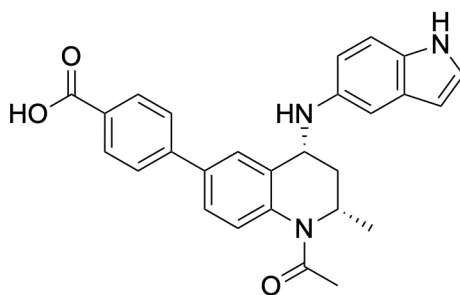

**13**

HPLC data 4- $\{(2S,4R)\}$ -1-acetyl-4- $\{(1,3\text{-benzothiazol-6-yl})\}$ amino-2-methyl-1,2,3,4-tetrahydroquinolin-6-yl $\}$ benzoic acid (**14**)

Acquisition Method Purity short run @254 nm  
Acquisition Date/Time 4/26/2021 5:06 pm  
Injection Volume 10  
Sample Name DM-C-15\_TFA\_254  
Sample Description  
Batch Description

DM-C-15\_TFA\_254 : Injection 1

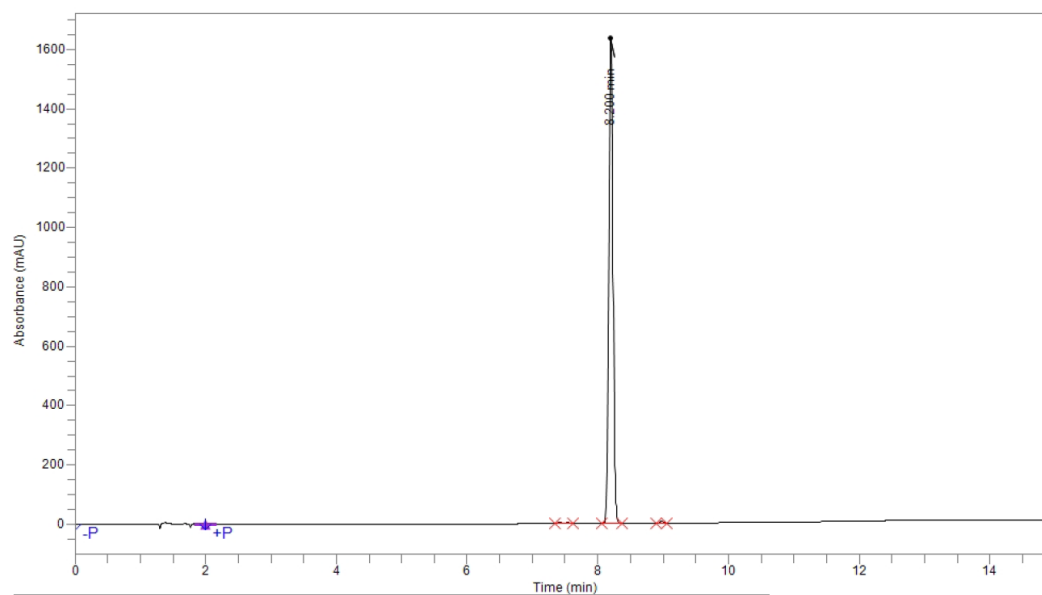

| Time         | Height      | Area        | Area % |
|--------------|-------------|-------------|--------|
| 7.417        | 5,023.1     | 20,225.8    | 0.28   |
| 7.544        | 3,939.2     | 15,633.4    | 0.22   |
| 8.200        | 1,637,536.5 | 7,065,234.4 | 99.14  |
| 8.975        | 6,745.5     | 25,655.1    | 0.36   |
| <b>Total</b> |             | 7,126,748.8 | 100.00 |

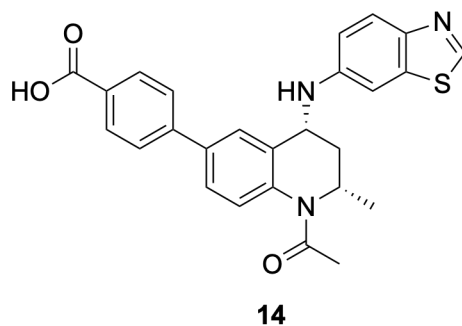

HPLC data 4-*{(2S,4R)-1-acetyl-2-methyl-4-[(quinolin-6-yl)amino]-1,2,3,4-tetrahydroquinolin-6-yl}*benzoic acid (**15**)

Acquisition Method Purity short run @254 nm  
Acquisition Date/Time 8/3/2021 11:14 am  
Injection Volume 10  
Sample Name DM-C-16\_254  
Sample Description  
Batch Description

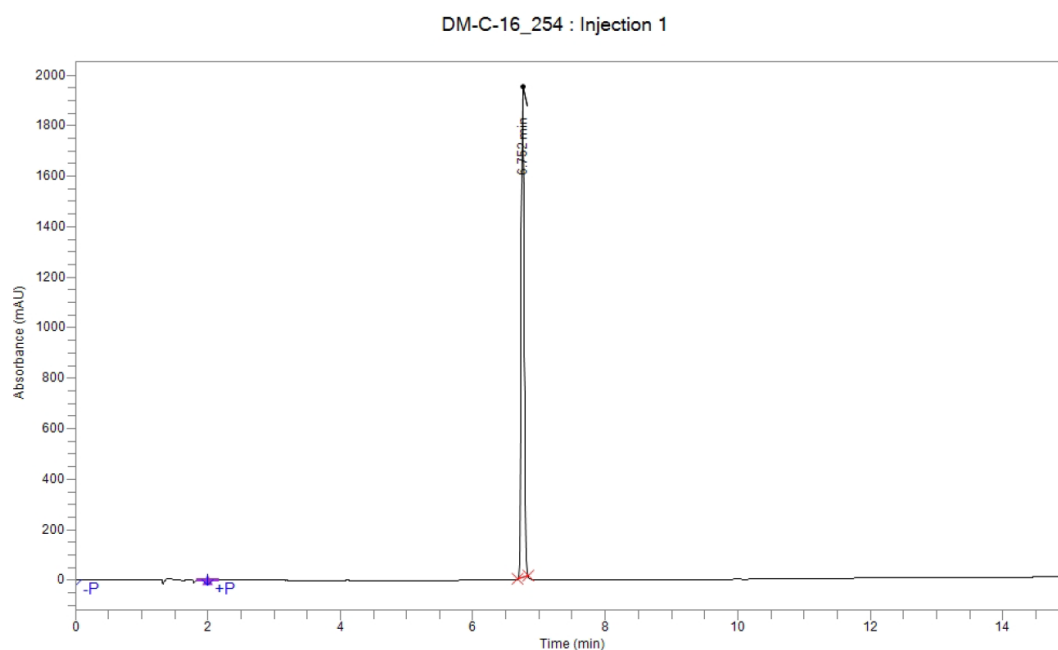

| Time         | Height      | Area        | Area % |
|--------------|-------------|-------------|--------|
| 6.752        | 1,950,635.1 | 6,319,715.2 | 100.00 |
| <b>Total</b> |             | 6,319,715.2 | 100.00 |

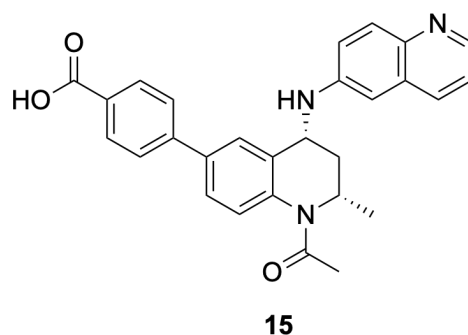

HPLC data ethyl ethyl 4-((2*S*,4*R*)-1-acetyl-4-[(1-benzothiophen-6-yl)amino]-2-methyl-1,2,3,4-tetrahydroquinolin-6-yl)benzoate (**16**)

Acquisition Method Purity short run @254 nm  
Acquisition Date/Time 8/2/2021 1:19 pm  
Injection Volume 10  
Sample Name DM-C-30\_dil\_254  
Sample Description  
Batch Description

DM-C-30\_dil\_254 : Injection 1

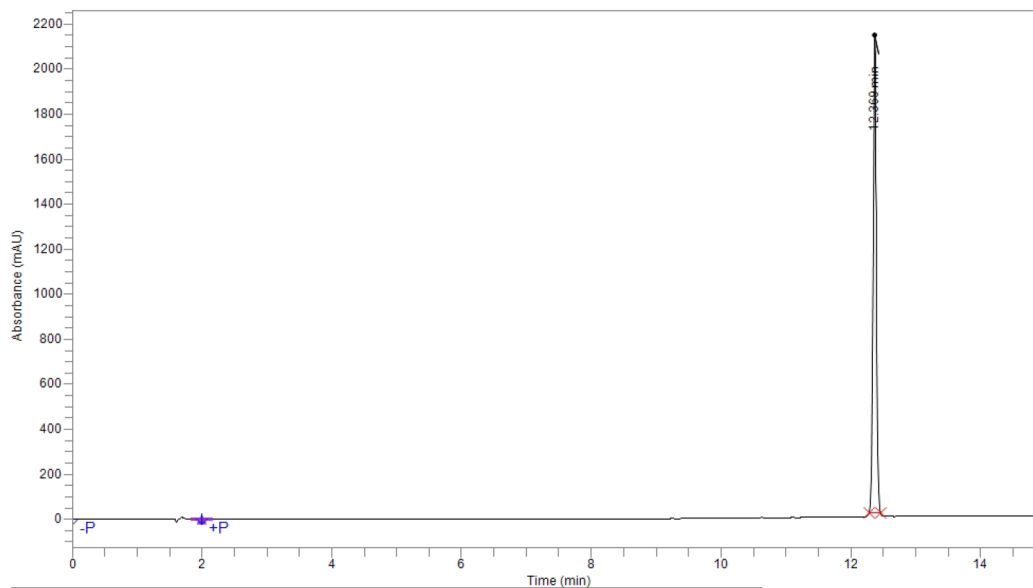

| Time         | Height      | Area        | Area % |
|--------------|-------------|-------------|--------|
| 12.369       | 2,124,976.7 | 7,960,757.9 | 100.00 |
| <b>Total</b> |             | 7,960,757.9 | 100.00 |

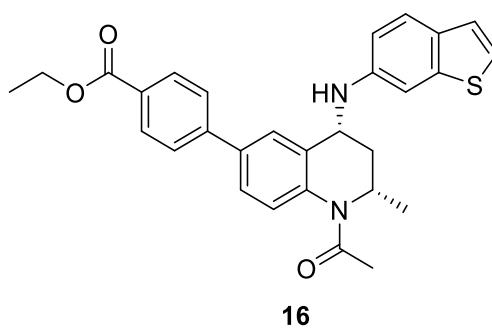



HPLC data ethyl 4-((2*R*,4*S*)-1-acetyl-4-[(1-benzothiophen-6-yl)amino]-2-methyl-1,2,3,4-tetrahydroquinolin-6-yl)benzoate (**17**)

Acquisition Method Purity short run @254 nm  
Acquisition Date/Time 8/2/2021 2:15 pm  
Injection Volume 10  
Sample Name DM-C-34\_dil\_254  
Sample Description  
Batch Description

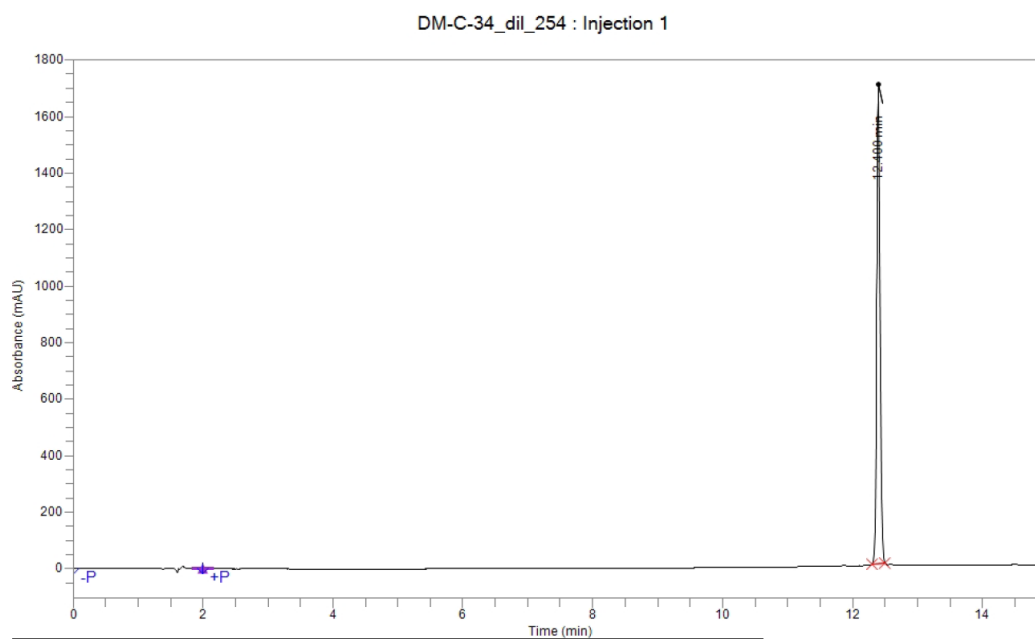

| Time         | Height      | Area        | Area % |
|--------------|-------------|-------------|--------|
| 12.400       | 1,697,084.8 | 6,441,828.6 | 100.00 |
| <b>Total</b> |             | 6,441,828.6 | 100.00 |

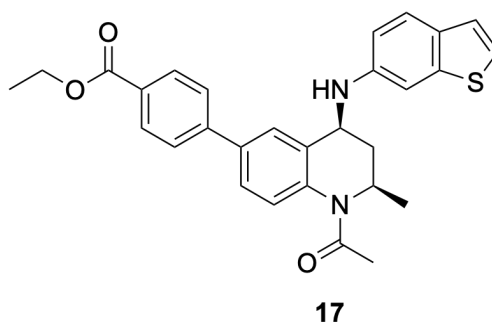

HPLC data ethyl 4-((2*S*,4*R*)-1-acetyl-4-[(1-benzofuran-6-yl)amino]-2-methyl-1,2,3,4-tetrahydroquinolin-6-yl)benzoate (**18**)

Acquisition Method Purity short run @254 nm  
Acquisition Date/Time 7/30/2021 12:43 pm  
Injection Volume 20  
Sample Name DM-C-38\_254  
Sample Description  
Batch Description

DM-C-38\_254 : Injection 1

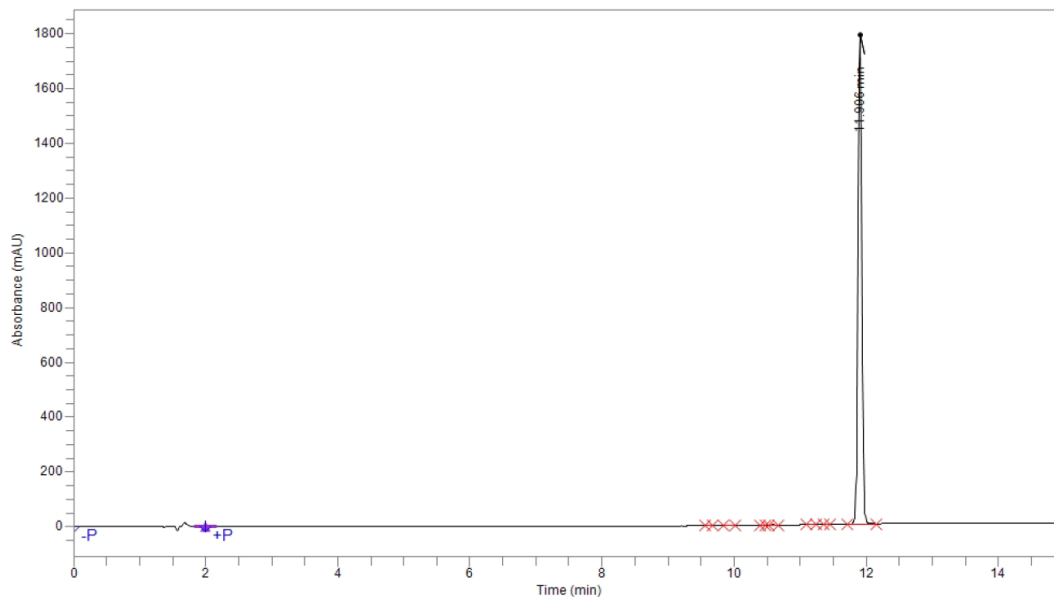

| Time         | Height      | Area        | Area % |
|--------------|-------------|-------------|--------|
| 9.625        | 299.2       | 1,395.7     | 0.02   |
| 9.930        | 1,195.7     | 5,165.4     | 0.08   |
| 10.452       | 130.6       | 477.7       | 0.01   |
| 10.594       | 1,589.5     | 6,002.8     | 0.09   |
| 11.162       | 1,553.5     | 5,675.6     | 0.08   |
| 11.419       | 463.7       | 1,391.3     | 0.02   |
| 11.906       | 1,789,529.3 | 6,775,194.1 | 99.70  |
| <b>Total</b> |             | 6,795,302.6 | 100.00 |

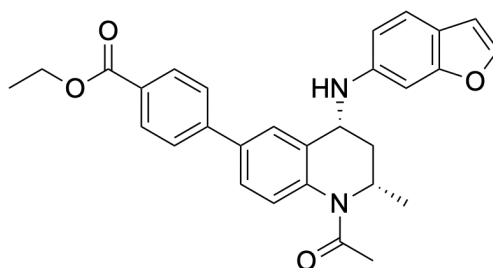

**18**

HPLC data ethyl 4-((2*S*,4*R*)-1-acetyl-4-((1-benzothiophen-5-ylamino)-2-methyl-1,2,3,4-tetrahydroquinolin-6-yl)benzoate (**19**)

Acquisition Method Purity short run @254 nm  
Acquisition Date/Time 8/2/2021 12:23 pm  
Injection Volume 10  
Sample Name DM-C-29\_dil\_254  
Sample Description  
Batch Description

DM-C-29\_dil\_254 : Injection 1

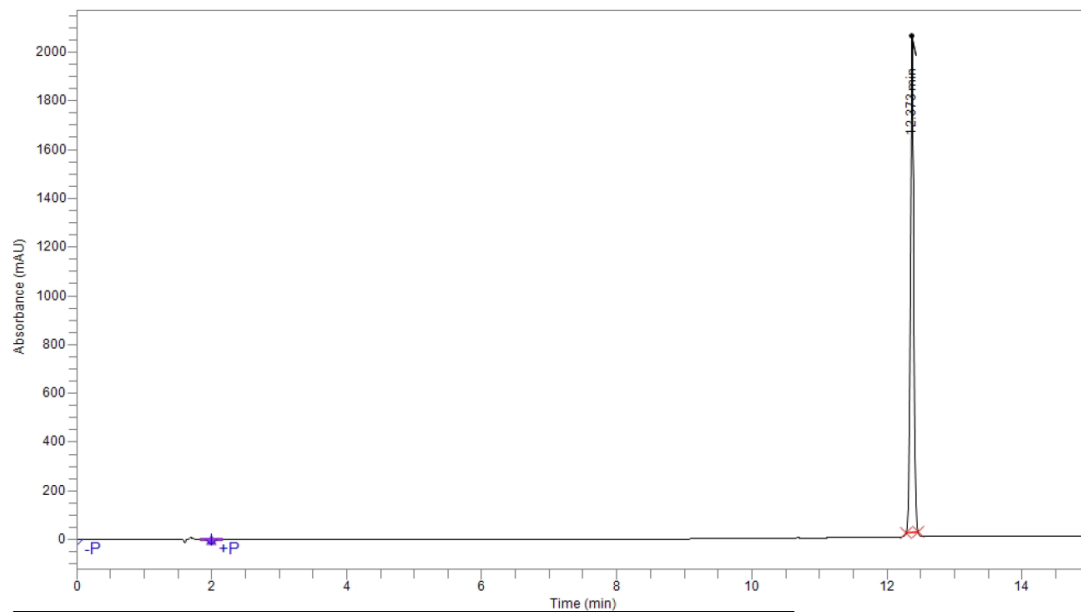

| Time         | Height      | Area        | Area % |
|--------------|-------------|-------------|--------|
| 12.373       | 2,041,138.1 | 7,599,224.0 | 100.00 |
| <b>Total</b> |             | 7,599,224.0 | 100.00 |

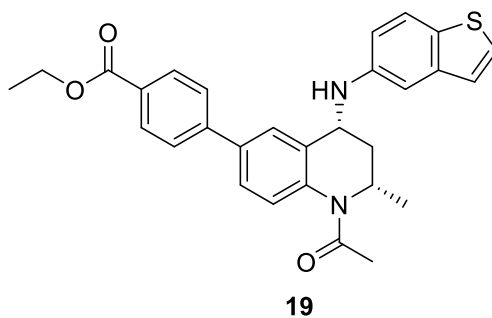

# HPLC data ethyl 4-((2*S*,4*R*)-1-acetyl-4-((1*H*-indol-5-yl)amino)-2-methyl-1,2,3,4-tetrahydroquinolin-6-yl)benzoate (**20**)

Acquisition Method Purity short run @254 nm  
Acquisition Date/Time 4/2/2021 11:33 am  
Injection Volume 20  
Sample Name DM-C-06\_wash\_254  
Sample Description  
Batch Description

DM-C-06\_wash\_254 : Injection 1

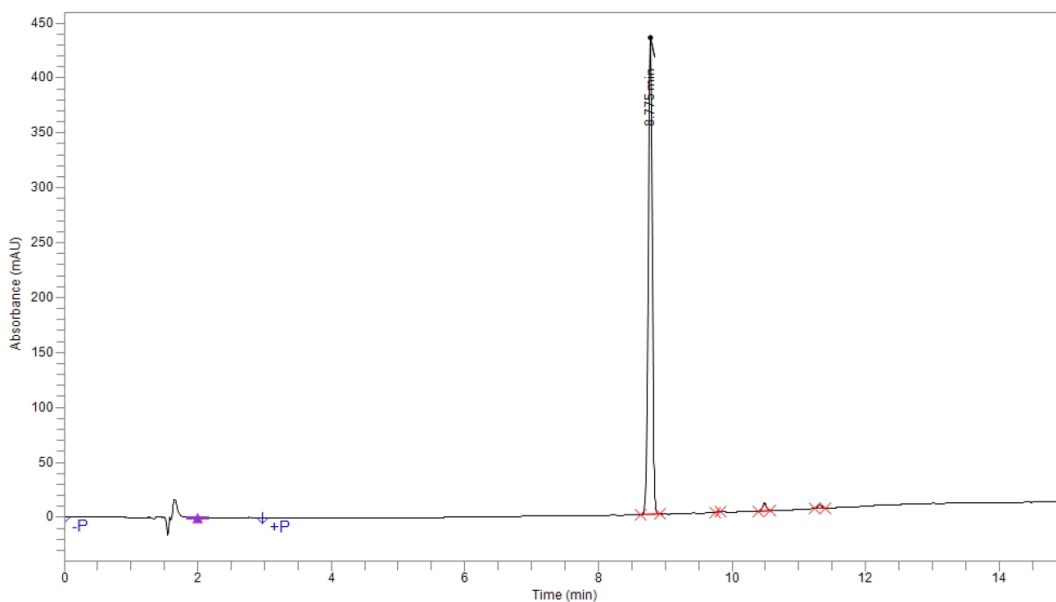

| Time         | Height    | Area        | Area % |
|--------------|-----------|-------------|--------|
| 8.775        | 435,039.4 | 1,740,246.3 | 97.46  |
| 9.801        | 467.8     | 1,309.8     | 0.07   |
| 10.487       | 7,430.7   | 31,173.1    | 1.75   |
| 11.313       | 3,123.3   | 12,951.6    | 0.73   |
| <b>Total</b> |           | 1,785,680.8 | 100.00 |

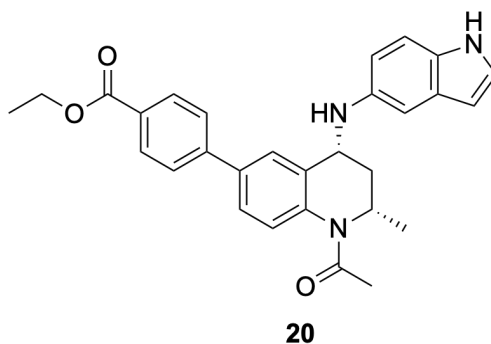

HPLC data ethyl 4-((2*S*,4*R*)1-acetyl-4-[(1,3-benzothiazol-6-yl)amino]-2-methyl-1,2,3,4-tetrahydroquinolin-6-yl)benzoate (**21**)

Acquisition Method Purity short run @254 nm  
Acquisition Date/Time 3/12/2021 12:10 pm  
Injection Volume 10  
Sample Name DM-B-73  
Sample Description  
Batch Description

DM-B-73 : Injection 1

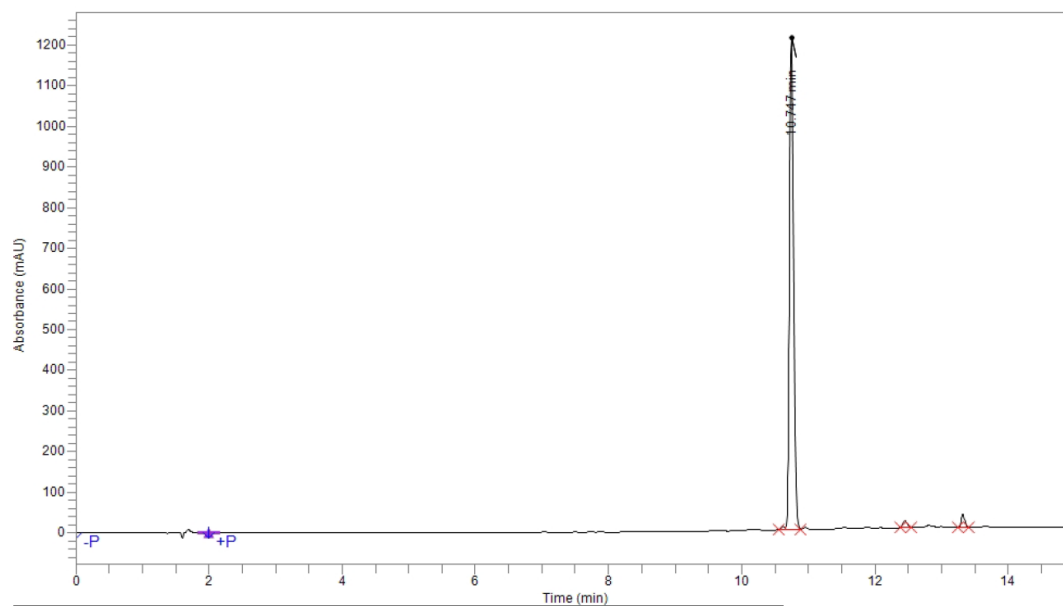

| Time         | Height      | Area        | Area % |
|--------------|-------------|-------------|--------|
| 10.622       | 7,317.9     | 23,694.3    | 0.44   |
| 10.747       | 1,211,063.6 | 5,157,041.3 | 95.98  |
| 12.454       | 16,594.8    | 74,155.0    | 1.38   |
| 13.323       | 31,272.3    | 117,879.9   | 2.19   |
| <b>Total</b> |             | 5,372,770.5 | 100.00 |

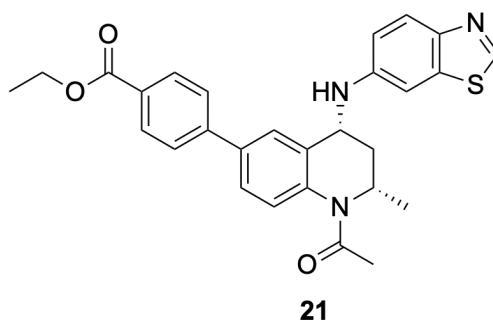

# HPLC data ethyl 4-((2*S*,4*R*)-1-acetyl-2-methyl-4-[(quinolin-6-yl)amino]-1,2,3,4-tetrahydroquinolin-6-yl)benzoate (**22**)

Acquisition Method Purity short run @254 nm  
Acquisition Date/Time 9/28/2020 3:19 pm  
Injection Volume 10  
Sample Name DM-B-27  
Sample Description  
Batch Description

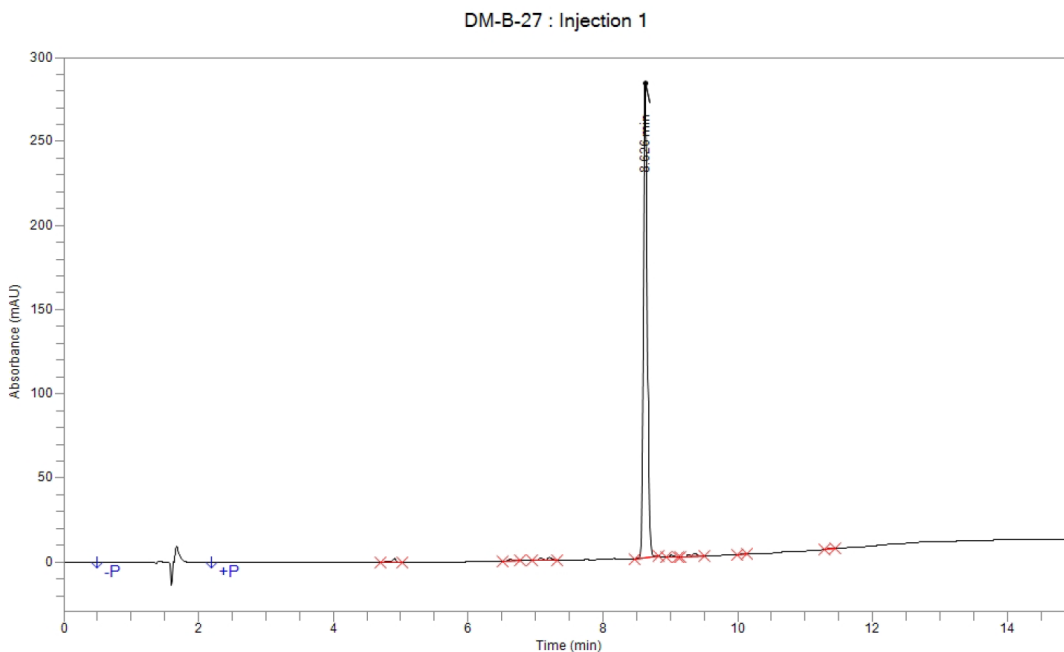

| Time         | Height    | Area        | Area % |
|--------------|-----------|-------------|--------|
| 4.908        | 2,391.5   | 13,656.7    | 1.08   |
| 6.632        | 802.8     | 3,777.1     | 0.30   |
| 7.083        | 1,284.6   | 5,017.9     | 0.40   |
| 7.211        | 1,538.7   | 6,397.1     | 0.51   |
| 8.626        | 282,406.3 | 1,208,302.0 | 95.79  |
| 9.017        | 1,152.0   | 5,256.9     | 0.42   |
| 9.273        | 1,535.1   | 6,169.8     | 0.49   |
| 9.366        | 1,956.0   | 8,364.1     | 0.66   |
| 10.063       | 397.5     | 1,722.0     | 0.14   |
| 11.361       | 601.1     | 2,695.2     | 0.21   |
| <b>Total</b> |           | 1,261,358.8 | 100.00 |

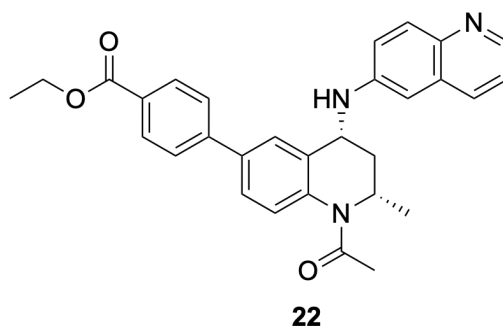

## References

- (1) Savitsky, P.; Bray, J.; Cooper, C. D. O.; Marsden, B. D.; Mahajan, P.; Burgess-Brown, N. A.; Gileadi, O. High-Throughput Production of Human Proteins for Crystallization: The SGC Experience. *J. Struct. Biol.* **2010**, *172*, 3–13. <https://doi.org/10.1016/j.jsb.2010.06.008>.
- (2) Jumper, J.; Evans, R.; Pritzel, A.; Green, T.; Figurnov, M.; Ronneberger, O.; Tunyasuvunakool, K.; Bates, R.; Žídek, A.; Potapenko, A.; Bridgland, A.; Meyer, C.; Kohl, S. A. A.; Ballard, A. J.; Cowie, A.; Romera-Paredes, B.; Nikolov, S.; Jain, R.; Adler, J.; Back, T.; Petersen, S.; Reiman, D.; Clancy, E.; Zielinski, M.; Steinegger, M.; Pacholska, M.; Berghammer, T.; Bodenstein, S.; Silver, D.; Vinyals, O.; Senior, A. W.; Kavukcuoglu, K.; Kohli, P.; Hassabis, D. Highly Accurate Protein Structure Prediction with AlphaFold. *Nature* **2021**, *596*, 583–589. <https://doi.org/10.1038/s41586-021-03819-2>.
- (3) Gosmini, R.; Nguyen, V.-L.; Toum, J.; Simon, C.; Brusq, J.-M. G.; Krysa, G.; Mirguet, O.; Riou-Eymard, A. M.; Boursier, E. V.; Trotter, L.; Bamborough, P.; Clark, H.; Chung, C.-W.; Cutler, L.; Demont, E. H.; Kaur, R.; Lewis, A. J.; Schilling, M. B.; Soden, P. E.; Taylor, S.; Walker, A. L.; Walker, M. D.; Prinjha, R. K.; Nicodeme, E. The Discovery of I-BET726 (GSK1324726A), a Potent Tetrahydroquinoline ApoA1 Up-Regulator and Selective BET Bromodomain Inhibitor. *J. Med. Chem.* **2014**, *57*, 8111–8131. <https://doi.org/10.1021/jm5010539>.
- (4) Shadrack, W. R.; Slavish, P. J.; Chai, S. C.; Waddell, B.; Connelly, M.; Low, J. A.; Tallant, C.; Young, B. M.; Bharatham, N.; Knapp, S.; Boyd, V. A.; Morfouace, M.; Roussel, M. F.; Chen, T.; Lee, R. E.; Guy, R. K.; Shelat, A. A.; Potter, P. M. Exploiting a Water Network to Achieve Enthalpy-Driven, Bromodomain-Selective BET Inhibitors. *Bioorg. Med. Chem.* **2018**, *26*, 25–36. <https://doi.org/10.1016/j.bmc.2017.10.042>.
- (5) Hewings, D. S.; Fedorov, O.; Filippakopoulos, P.; Martin, S.; Picaud, S.; Tumber, A.; Wells, C.; Olcina, M. M.; Freeman, K.; Gill, A.; Ritchie, A. J.; Sheppard, D. W.; Russell, A. J.; Hammond, E. M.; Knapp, S.; Brennan, P. E.; Conway, S. J. Optimization of 3,5-Dimethylisoxazole Derivatives as Potent Bromodomain Ligands. *J. Med. Chem.* **2013**, *56*, 3217–3227. <https://doi.org/10.1021/jm301588r>.
- (6) Jennings, L. E.; Schiedel, M.; Hewings, D. S.; Picaud, S.; Laurin, C. M. C.; Bruno, P. A.; Bluck, J. P.; Scorch, A. R.; See, L.; Reynolds, J. K.; Moroglu, M.; Mistry, I. N.; Hicks, A.; Guzanov, P.; Clayton, J.; Evans, C. N. G.; Stazi, G.; Biggin, P. C.; Mapp, A. K.; Hammond, E. M.; Humphreys, P. G.; Filippakopoulos, P.; Conway, S. J. BET Bromodomain Ligands: Probing the WPF Shelf to Improve BRD4 Bromodomain Affinity and Metabolic Stability. *Bioorg. Med. Chem.* **2018**, *26*, 2937–2957. <https://doi.org/10.1016/j.bmc.2018.05.003>.
- (7) Filippakopoulos, P.; Qi, J.; Picaud, S.; Shen, Y.; Smith, W. B.; Fedorov, O.; Morse, E. M.; Keates, T.; Hickman, T. T.; Felletar, I.; Philpott, M.; Munro, S.; McKeown, M. R.; Wang, Y.; Christie, A. L.; West, N.; Cameron, M. J.; Schwartz, B.; Heightman, T. D.; Thangue, N. L.; French, C. A.; Wiest, O.; Kung, A. L.; Knapp, S.; Bradner, J. E. Selective Inhibition of BET Bromodomains. *Nature* **2010**, *468*, 1067–1073. <https://doi.org/10.1038/nature09504>.
- (8) Niesen, F. H.; Berglund, H.; Vedadi, M. The Use of Differential Scanning Fluorimetry to Detect Ligand Interactions That Promote Protein Stability. *Nat. Protoc.* **2007**, *2*, 2212–2221. <https://doi.org/10.1038/nprot.2007.321>.
- (9) Otwinowski, Z.; Minor, W. Processing of X-Ray Diffraction Data Collected in Oscillation Mode. *Methods Enzymol.* **1997**, *276*, 307–326. [https://doi.org/10.1016/s0076-6879\(97\)76066-x](https://doi.org/10.1016/s0076-6879(97)76066-x).

- (10) Clabbers, M. T. B.; Gruene, T.; Parkhurst, J. M.; Abrahams, J. P.; Waterman, D. G. Electron Diffraction Data Processing with DIALS. *Acta Crystallogr. Sect. D Struct. Biology* **2018**, *74*, 506–518. <https://doi.org/10.1107/s2059798318007726>.
- (11) McCoy, A. J.; Grosse-Kunstleve, R. W.; Adams, P. D.; Winn, M. D.; Storoni, L. C.; Read, R. J. Phaser Crystallographic Software. *J. Appl. Crystallogr.* **2007**, *40*, 658–674. <https://doi.org/10.1107/s0021889807021206>.
- (12) Emsley, P.; Lohkamp, B.; Scott, W. G.; Cowtan, K. Features and Development of Coot. *Acta Crystallogr. Sect. D* **2010**, *66*, 486–501. <https://doi.org/10.1107/s0907444910007493>.
- (13) Afonine, P. V.; Grosse-Kunstleve, R. W.; Echols, N.; Headd, J. J.; Moriarty, N. W.; Mustyakimov, M.; Terwilliger, T. C.; Urzhumtsev, A.; Zwart, P. H.; Adams, P. D. Towards Automated Crystallographic Structure Refinement with Phenix.Refine. *Acta Crystallogr. Sect. D* **2012**, *68*, 352–367. <https://doi.org/10.1107/s0907444912001308>.
